# Supplementary material for: Effect of conformational rigidity on the stereoselectivity of nucleophilic additions to five-membered ring bicyclic oxocarbenium ion intermediates
Source: Royal Society of Chemistry journal article supplement (doi:10.1039/c4ob01251h), 2014-01-01

**Effect of Conformational Rigidity on the Stereoselectivity of Nucleophilic Additions  
to Five-membered Ring Bicyclic Oxocarbenium Ion Intermediates.**

O. Lavinda, Vi Tuong Tran, and K. A. Woerpel\*

*Department of Chemistry, New York University, New York, New York 10003,*

*United States*

*kwoerpel@nyu.edu*

**Table of Contents**

| Nr. | Title                                                                             | Page |
|-----|-----------------------------------------------------------------------------------|------|
| 1.  | Stereochemical Proof of Allyl Product <b>20</b>                                   | S2   |
| 2.  | Stereochemical Proof of Allyl Product <b>21</b> by <sup>13</sup> C NMR Prediction | S2   |
| 3.  | Computational results                                                             | S7   |
| 4.  | NMR spectra                                                                       | S24  |

### Stereochemical Proof of Allyl Products

The stereochemistry of **20** was determined by analysis of nOe data: Relevant DPGSE-nOe data (mixing time 0.5 s): (the peaks in the  $^1\text{H}$  NMR spectra were assigned using  $^1\text{H}$  NMR chemical shifts,  $^{13}\text{C}$  NMR chemical shifts, COSY, and HSQC)

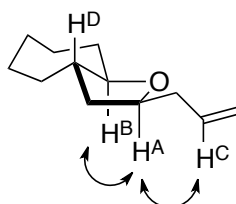

**20**

$\text{H}^{\text{A}}$  irradiated:  $\text{H}^{\text{B}}$  (0.4%)  $\text{H}^{\text{C}}$  (0.2%)

$\text{H}^{\text{B}}$  irradiated:  $\text{H}^{\text{A}}$  (0.8%)

Note: There was no nOe observed between  $\text{H}^{\text{A}}$  and  $\text{H}^{\text{D}}$

### Stereochemical Proof of Allyl Product **21** by $^{13}\text{C}$ NMR Prediction

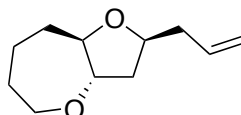

**21**

Stereochemistry of **21** was assigned by  $^{13}\text{C}$  NMR prediction. Gas phase low energy conformers of **21-cis** and **21-trans** diastereomers were located using conformational search option in Spartan'10<sup>1</sup> software package at PM3 level of theory. Conformers were further optimized using B3LYP/6-31G\*\* method<sup>2</sup> in Gaussian09.<sup>3</sup> Polarizable Continuum Model<sup>4</sup> (PCM) was used to introduce benzene as an implicit solvent with the use of *SCRF=(Solvent=Benzene)* keywords. NMR shielding tensor calculations were done at the same level of theory employing *giao* command. Shielding constants were first Boltzmann averaged and the averages were used to calculate the chemical shifts according to the procedure described by Smith et al.<sup>5</sup> Cartesian

coordinates for the optimized geometries of the lowest energy conformations and diagnostic chemical shifts, both experimental and theoretical, are reported below.

### References:

1. *Spartan '10*, Wavefunction, Inc. Irvine, CA.
2. Gaussian 09, Revision B.01, Frisch, M. J.; Trucks, G. W.; Schlegel, H. B.; Scuseria, G. E.; Robb, M. A.; Cheeseman, J. R.; Scalmani, G.; Barone, V.; Mennucci, B.; Petersson, G. A.; Nakatsuji, H.; Caricato, M.; Li, X.; Hratchian, H. P.; Izmaylov, A. F.; Bloino, J.; Zheng, G.; Sonnenberg, J. L.; Hada, M.; Ehara, M.; Toyota, K.; Fukuda, R.; Hasegawa, J.; Ishida, M.; Nakajima, T.; Honda, Y.; Kitao, O.; Nakai, H.; Vreven, T.; Montgomery, J. A., Jr.; Peralta, J. E.; Ogliaro, F.; Bearpark, M.; Heyd, J. J.; Brothers, E.; Kudin, K. N.; Staroverov, V. N.; Kobayashi, R.; Normand, J.; Raghavachari, K.; Rendell, A.; Burant, J. C.; Iyengar, S. S.; Tomasi, J.; Cossi, M.; Rega, N.; Millam, N. J.; Klene, M.; Knox, J. E.; Cross, J. B.; Bakken, V.; Adamo, C.; Jaramillo, J.; Gomperts, R.; Stratmann, R. E.; Yazyev, O.; Austin, A. J.; Cammi, R.; Pomelli, C.; Ochterski, J. W.; Martin, R. L.; Morokuma, K.; Zakrzewski, V. G.; Voth, G. A.; Salvador, P.; Dannenberg, J. J.; Dapprich, S.; Daniels, A. D.; Farkas, Ö.; Foresman, J. B.; Ortiz, J. V.; Cioslowski, J.; Fox, D. J. Gaussian, Inc., Wallingford CT, 2009.
3. (a) Becke, A. D. *J. Chem. Phys.* **1993**, *98*, 1372–1377. (b) Becke, A. D. *J. Chem. Phys.* **1993**, *98*, 5648–5652. (c) Lee, C.; Yang, W.; Parr, R. G. *Phys. Rev. B* **1988**, *37*, 785–789. (d) Stephens, P. J.; Devlin, F. J.; Chabalowski, C. F.; Frisch, M. J. *J. Phys. Chem.* **1994**, *98*, 11623–11627.
4. Tomasi, J.; Mennucci, B.; Cammi, R. *Chem. Rev.*, **2005**, *105*, 2999-3093.
5. Smith, S. G.; Paton, R. S.; Burton, J. W.; Goodman, J. M. *J. Org. Chem.* **2008**, *73* (11), 4053–4062.

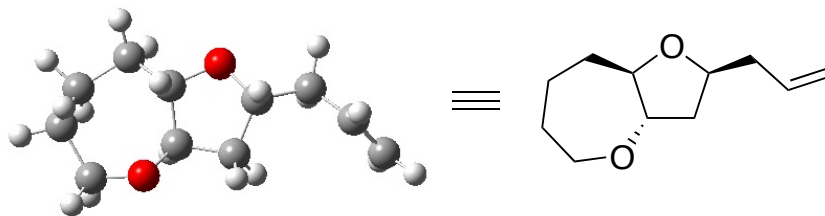

**21-trans**

#p opt=calcfc freq b3lyp/6-31g(d,p) scrf=(solvent=benzene)  
 Number of imaginary frequencies = 0

Zero-point correction= 0.276826 (Hartree/Particle)  
 Thermal correction to Energy= 0.289324  
 Thermal correction to Enthalpy= 0.290268  
 Thermal correction to Gibbs Free Energy= 0.237334  
 Sum of electronic and zero-point Energies= -580.166452  
 Sum of electronic and thermal Energies= -580.153955  
 Sum of electronic and thermal Enthalpies= -580.153010  
 Sum of electronic and thermal Free Energies= -580.205944

| 0 1 |             |             |             |
|-----|-------------|-------------|-------------|
| H   | 2.04245400  | 2.46077200  | -0.51536800 |
| C   | 1.82638500  | 1.66761000  | 0.20906100  |
| H   | 1.40970000  | 2.16215500  | 1.09397600  |
| C   | 3.13039700  | 0.93349100  | 0.59930100  |
| H   | 3.06108800  | 0.59765800  | 1.64208100  |
| H   | 3.95059100  | 1.65952600  | 0.57820300  |
| C   | 3.51783000  | -0.28675600 | -0.26040300 |
| H   | 3.42397000  | -0.06491600 | -1.33079900 |
| H   | 4.57854600  | -0.50858200 | -0.08471900 |
| C   | 2.74989300  | -1.57762400 | 0.06620500  |
| H   | 2.82711900  | -1.77240200 | 1.14991400  |
| H   | 3.21351300  | -2.42114200 | -0.45489000 |
| O   | 1.38342000  | -1.61260300 | -0.33081000 |
| C   | 0.56603900  | -0.62465000 | 0.28170300  |
| H   | 0.78731100  | -0.57323800 | 1.35892800  |
| C   | 0.74301400  | 0.76284500  | -0.37375300 |
| H   | 0.94968900  | 0.56395400  | -1.43962200 |
| C   | -0.92515800 | -0.93532400 | 0.04497100  |
| H   | -1.01930800 | -1.76629000 | -0.65840300 |
| H   | -1.42887900 | -1.22372200 | 0.97157200  |
| C   | -1.51102100 | 0.37988100  | -0.52483200 |
| H   | -1.62061500 | 0.29001600  | -1.61850800 |
| O   | -0.53056000 | 1.39006300  | -0.24321400 |
| C   | -2.84419500 | 0.82581900  | 0.07918600  |

|   |             |             |             |
|---|-------------|-------------|-------------|
| H | -3.04468500 | 1.84283500  | -0.28496700 |
| H | -2.73834300 | 0.88693700  | 1.16858300  |
| C | -3.98558000 | -0.08125300 | -0.28866600 |
| H | -4.18519300 | -0.18665900 | -1.35611200 |
| C | -4.74743900 | -0.74836100 | 0.57889900  |
| H | -4.58851900 | -0.67408100 | 1.65223200  |
| H | -5.56231400 | -1.38656700 | 0.25006400  |

|     | Calculated chemical shift,<br>ppm | Observed chemical shift,<br>ppm |
|-----|-----------------------------------|---------------------------------|
| C-4 | 83.13                             | 83.75                           |
| C-3 | 78.93                             | 80.60                           |

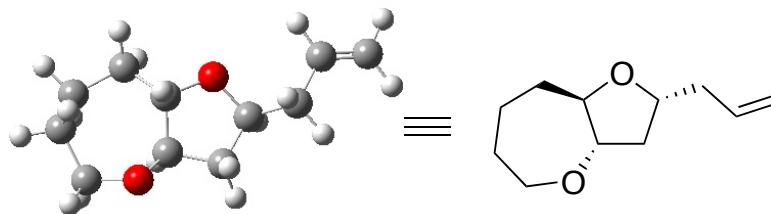

**21-cis**

*#p opt=calcfc freq b3lyp/6-31g(d,p) scrf=(solvent=benzene)*  
 Number of imaginary frequencies = 0

Zero-point correction= 0.276558 (Hartree/Particle)  
 Thermal correction to Energy= 0.289191  
 Thermal correction to Enthalpy= 0.290136  
 Thermal correction to Gibbs Free Energy= 0.236391  
 Sum of electronic and zero-point Energies= -580.166504  
 Sum of electronic and thermal Energies= -580.153871  
 Sum of electronic and thermal Enthalpies= -580.152927  
 Sum of electronic and thermal Free Energies= -580.206672

|     |            |            |             |
|-----|------------|------------|-------------|
| 0 1 |            |            |             |
| H   | 1.25182900 | 2.52947500 | -0.67486400 |
| C   | 1.34276300 | 1.76239900 | 0.10258600  |
| H   | 0.88140700 | 2.18247100 | 1.00335300  |
| C   | 2.83475000 | 1.46919400 | 0.38402600  |
| H   | 2.95941400 | 1.20294800 | 1.44196700  |
| H   | 3.39653200 | 2.39987700 | 0.24733700  |
| C   | 3.49262700 | 0.35729300 | -0.45670500 |
| H   | 3.24384500 | 0.46135000 | -1.52020400 |

|   |             |             |             |
|---|-------------|-------------|-------------|
| H | 4.58247000  | 0.46676400  | -0.38316400 |
| C | 3.17005000  | -1.07056400 | 0.00711100  |
| H | 3.38741200  | -1.15486700 | 1.08574700  |
| H | 3.81480400  | -1.78315200 | -0.51661400 |
| O | 1.84502800  | -1.52331900 | -0.25296400 |
| C | 0.82219800  | -0.78277800 | 0.39067000  |
| H | 1.08386900  | -0.60708400 | 1.44711900  |
| C | 0.51048100  | 0.54752700  | -0.32057400 |
| H | 0.65522400  | 0.35675800  | -1.39564400 |
| C | -0.51367800 | -1.51674500 | 0.27996100  |
| H | -0.56442600 | -1.98615200 | -0.70960900 |
| H | -0.64611300 | -2.29514700 | 1.03538000  |
| C | -1.54321100 | -0.38679100 | 0.39995900  |
| O | -0.87721800 | 0.80847600  | -0.06692200 |
| H | -1.81239300 | -0.22749500 | 1.45487100  |
| C | -2.82928600 | -0.60909800 | -0.40633200 |
| H | -3.29517100 | -1.54700800 | -0.07877400 |
| H | -2.53908400 | -0.73789300 | -1.45881800 |
| C | -3.80756700 | 0.52617300  | -0.28144600 |
| H | -3.42323800 | 1.50518000  | -0.56358700 |
| C | -5.06437800 | 0.40946600  | 0.14811100  |
| H | -5.72591100 | 1.26802400  | 0.21931700  |
| H | -5.48143000 | -0.55175500 | 0.44107700  |

|     | Calculated chemical shift,<br>ppm | Observed chemical shift,<br>ppm |
|-----|-----------------------------------|---------------------------------|
| C-4 | 82.36                             | 81.73                           |
| C-3 | 80.33                             | 81.10                           |

## Computational details

### 1. Conformational Analysis of Oxocarbenium Ions

To locate low energy conformations of oxocarbenium ion intermediates, initial guess structures were generated using semi-empirical PM3 method in Spartan'10.<sup>1</sup> The conformational search was performed several times until an adequate sampling of conformational space was achieved. Conformers within 10 kcal/mol of each other were carried forward for optimization at the higher level of theory. Usually, the number of unique conformations found in the searches would not exceed three structures. The final structures were subjected to optimization using B3LYP<sup>2</sup> hybrid functional in Gaussian G09-B01<sup>3</sup> software package using Pople's<sup>4</sup> 6-31+G\*\* basis set. B3LYP methods have been shown to reproduce successfully experimental geometries in a range of molecules.<sup>5</sup> To better simulate experimental conditions carried out in this work, we used Polarizable Continuum Model (PCM)<sup>6</sup> for introducing dichloromethane as an implicit solvent with the use of *SCRF=(Solvent=Dichloromethane)* keywords. Obtained structures were characterized as local minima by harmonic frequency analysis. All local minima had zero negative frequencies.

### 2. Transition States Structures for Nucleophilic Additions of Allyltrimethylsilane to Oxocarbenium Ions 26 and 29

Transition states were modeled using geometries of the lowest energy conformations found in the previous search and the optimized structure of allyltrimethylsilane. Both synclinal (60°) and antiperiplanar (180°) torsional angles between the approaching nucleophile and the oxocarbenium ion were considered.<sup>7,8</sup> The nucleophile was oriented such as to minimize the possible steric interactions, and the electrophilic attack was modeled to be anti to the silyl group, in accordance with the previous studies.<sup>9</sup> Several geometries for synclinal and antiperiplanar transition states were considered, but the synclinal transition states where the silyl group is gauche to the oxygen atom were the lowest energy (by up to 1.5 kcal/mol). Starting geometries containing single imaginary

frequency were generated by constraining the distance between the two reactive carbons that form the new bond to 1.8 Å, and allowing for optimization with constrain (using *AddRedundant* option in Gaussian). The resulting structures were next subjected to the transition state search with no constrains imposed. For both optimizations with constrain and the transition state searches, the B3LYP computational method was replaced with M06-2X method for several reasons. Previous computational studies on the addition of allylic silanes to oxocarbenium ions reported failure of B3LYP method to locate transition states.<sup>7</sup> M06-2X has shown accuracy comparable to CCSD methods, but at a lower computational cost,<sup>10</sup> and was recently used to simulate transition states of allyltrimethylsilane additions to propargylic cations.<sup>11</sup> Both optimizations with constrain and transition state search calculations were performed in solvent using *SCRF=(Solvent=Dichloromethane)* keywords. Because energies calculated in solvent medium are temperature dependent, relative energies were computed both at T=273 K, and T=195 K. Due to pseudorotation, seven-membered rings exhibit low frequency modes. To achieve satisfactory convergence and reliable imaginary frequencies, the integration grid was set equal to “*UltraFine*” using a “*Tight*” optimization criteria.<sup>12</sup> Harmonic frequency analysis verified that transition state structures were optimized to the first-order saddle points. Gibbs free energies were calculated as the sums of electronic and thermal free energies, including zero-point correction. Structures reported in the manuscript were visualized using GaussView5<sup>13</sup> software.

## References:

1. *Spartan'10*, Wavefunction, Inc. Irvine, CA.
2. (a) Becke, A. D. *J. Chem. Phys.* **1993**, *98*, 1372–1377. (b) Becke, A. D. *J. Chem. Phys.* **1993**, *98*, 5648–5652. (c) Lee, C.; Yang, W.; Parr, R. G. *Phys. Rev. B* **1988**, *37*, 785–789. (d) Stephens, P. J.; Devlin, F. J.; Chabalowski, C. F.; Frisch, M. J. *J. Phys. Chem.* **1994**, *98*, 11623–11627.
3. Gaussian 09, Revision B.01, Frisch, M. J.; Trucks, G. W.; Schlegel, H. B.; Scuseria, G. E.; Robb, M. A.; Cheeseman, J. R.; Scalmani, G.; Barone, V.; Mennucci, B.; Petersson, G. A.; Nakatsuji, H.; Caricato, M.; Li, X.; Hratchian, H. P.; Izmaylov,



- A. F.; Bloino, J.; Zheng, G.; Sonnenberg, J. L.; Hada, M.; Ehara, M.; Toyota, K.; Fukuda, R.; Hasegawa, J.; Ishida, M.; Nakajima, T.; Honda, Y.; Kitao, O.; Nakai, H.; Vreven, T.; Montgomery, J. A., Jr.; Peralta, J. E.; Ogliaro, F.; Bearpark, M.; Heyd, J. J.; Brothers, E.; Kudin, K. N.; Staroverov, V. N.; Kobayashi, R.; Normand, J.; Raghavachari, K.; Rendell, A.; Burant, J. C.; Iyengar, S. S.; Tomasi, J.; Cossi, M.; Rega, N.; Millam, N. J.; Klene, M.; Knox, J. E.; Cross, J. B.; Bakken, V.; Adamo, C.; Jaramillo, J.; Gomperts, R.; Stratmann, R. E.; Yazyev, O.; Austin, A. J.; Cammi, R.; Pomelli, C.; Ochterski, J. W.; Martin, R. L.; Morokuma, K.; Zakrzewski, V. G.; Voth, G. A.; Salvador, P.; Dannenberg, J. J.; Dapprich, S.; Daniels, A. D.; Farkas, Ö.; Foresman, J. B.; Ortiz, J. V.; Cioslowski, J.; Fox, D. J. Gaussian, Inc., Wallingford CT, 2009.
4. Hehre, W. J.; Random, L.; Schleyer, P. v. R.; Pople, J. A. *Ab Initio Molecular Orbital Theory*; Wiley: New York, 1986.
  5. Wiberg, K. B. *J. Comput. Chem.* **2003**, *25*, 1342–1346.
  6. Tomasi, J.; Mennucci, B.; Cammi, R. *Chem. Rev.*, **2005**, *105*, 2999–3093.
  7. Tietze, L. F.; Kinzel, T.; Schmatz, S. *J. Am. Chem. Soc.* **2006**, *128*, 11483–11495 and references within.
  8. Denmark, S. E.; Almstead, N. G. *J. Org. Chem.* **1994**, *59*, 5130–5132.
  9. Kahn, S. D.; Pau, C. F.; Chamberlin, A. R.; Hehre, W. J. *J. Am. Chem. Soc.* **1987**, *109*, 650–663.
  10. Zhao, Y.; Truhlar, D. G. *Theor. Chem. Accounts* **2008**, *120*, 215–241.
  11. Nitsch, D.; Huber, S. M.; Pothig, A.; Narayanan, A.; Olah, G. A.; Prakash, G. K.; Bach, T. *J. Am. Chem. Soc.* **2014**, *136*, 2851–2857.
  12. Æ. Fisher, G. W. Frisch, G. W. Trucks, Gaussian 03 User's Reference, Gaussian, Inc., Pittsburgh, PA, 2003.
  13. GaussView, Version 5, Dennington, R.; Keith, T.; Millam, J. *Semichem Inc.*, Shawnee Mission KS, 2009.

1. Low Energy Conformers of Oxocarbenium Ions using PCM(CH<sub>2</sub>Cl<sub>2</sub>)-M062X/631+G\*\* method

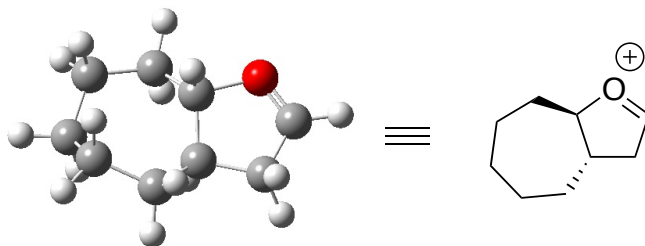

26

#p mp2/6-31+g(d,p) opt freq scrf=(solvent=dichloromethane)  
Number of imaginary frequencies = 0

|                                              |                             |
|----------------------------------------------|-----------------------------|
| Zero-point correction=                       | 0.233740 (Hartree/Particle) |
| Thermal correction to Energy=                | 0.242379                    |
| Thermal correction to Enthalpy=              | 0.243323                    |
| Thermal correction to Gibbs Free Energy=     | 0.200551                    |
| Sum of electronic and zero-point Energies=   | -425.463922                 |
| Sum of electronic and thermal Energies=      | -425.455283                 |
| Sum of electronic and thermal Enthalpies=    | -425.454339                 |
| Sum of electronic and thermal Free Energies= | -425.497111                 |

|     |             |             |             |
|-----|-------------|-------------|-------------|
| 1 1 |             |             |             |
| H   | -0.24075200 | -2.63096800 | -0.29579200 |
| C   | -0.44918300 | -1.67355000 | 0.18446800  |
| H   | -0.22029800 | -1.77113900 | 1.24862300  |
| C   | -1.93136600 | -1.32220100 | -0.01047600 |
| H   | -2.50772100 | -2.07267800 | 0.53368000  |
| H   | -2.18675900 | -1.43910500 | -1.06755500 |
| C   | -2.36805600 | 0.07818400  | 0.44058200  |
| H   | -3.45953100 | 0.09367800  | 0.41741300  |
| H   | -2.08425800 | 0.25368800  | 1.48300700  |
| C   | -1.85477000 | 1.20930800  | -0.46441900 |
| H   | -2.55344400 | 2.04726500  | -0.43296300 |
| H   | -1.86628200 | 0.84988100  | -1.49781400 |
| C   | -0.45724100 | 1.75717400  | -0.13237100 |
| H   | -0.04183100 | 2.23926400  | -1.02103100 |
| H   | -0.53201200 | 2.52529600  | 0.63990500  |
| C   | 0.52518900  | 0.69752800  | 0.36991400  |
| H   | 0.30942200  | 0.47032800  | 1.41702300  |
| C   | 0.44954700  | -0.61527200 | -0.39851100 |
| H   | 0.32383700  | -0.48901000 | -1.47605800 |

|   |            |             |             |
|---|------------|-------------|-------------|
| C | 2.00720900 | 1.09373500  | 0.27750600  |
| H | 2.22704100 | 1.72204500  | -0.59703000 |
| H | 2.41588300 | 1.60321900  | 1.14968000  |
| O | 1.89628500 | -1.13884300 | -0.30715800 |
| C | 2.66605600 | -0.20029600 | 0.04149300  |
| H | 3.72212300 | -0.43867600 | 0.10707000  |

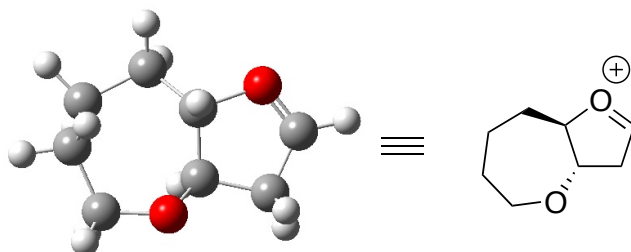

27

#p mp2/6-31+g(d,p) opt freq scrf=(solvent=dichloromethane)  
 Number of imaginary frequencies = 0

Zero-point correction= 0.208670 (Hartree/Particle)  
 Thermal correction to Energy= 0.217113  
 Thermal correction to Enthalpy= 0.218057  
 Thermal correction to Gibbs Free Energy= 0.175577  
 Sum of electronic and zero-point Energies= -461.325454  
 Sum of electronic and thermal Energies= -461.317011  
 Sum of electronic and thermal Enthalpies= -461.316067  
 Sum of electronic and thermal Free Energies= -461.358547

|     |             |             |             |
|-----|-------------|-------------|-------------|
| 1 1 |             |             |             |
| H   | 0.50181200  | 2.53610500  | -0.63549700 |
| C   | 0.42761700  | 1.75516600  | 0.12087300  |
| H   | -0.03009200 | 2.19238800  | 1.01060200  |
| C   | 1.82430500  | 1.19991600  | 0.47475200  |
| H   | 1.83411600  | 0.88492600  | 1.52083400  |
| H   | 2.53037900  | 2.02697700  | 0.39985000  |
| C   | 2.32600600  | 0.02927400  | -0.38716800 |
| H   | 2.12719300  | 0.19685400  | -1.44915000 |
| H   | 3.41284400  | -0.02155700 | -0.28382300 |
| C   | 1.81298700  | -1.34763500 | 0.02885400  |
| H   | 1.97488700  | -1.49809400 | 1.10175400  |
| H   | 2.33787600  | -2.12775900 | -0.51792900 |
| O   | 0.41910900  | -1.60132000 | -0.26635100 |
| C   | -0.44551600 | -0.68027000 | 0.36183600  |
| H   | -0.16465300 | -0.52918500 | 1.41034400  |
| C   | -0.45450200 | 0.64955800  | -0.39874900 |

|   |             |             |             |
|---|-------------|-------------|-------------|
| H | -0.32507800 | 0.46054100  | -1.46468300 |
| C | -1.89637600 | -1.15751000 | 0.26374600  |
| H | -2.03121500 | -1.79238300 | -0.62307500 |
| H | -2.28039600 | -1.70360400 | 1.12356300  |
| O | -1.91624200 | 1.08310300  | -0.31051100 |
| C | -2.62983200 | 0.09406900  | 0.02512500  |
| H | -3.69874800 | 0.26512200  | 0.08650700  |

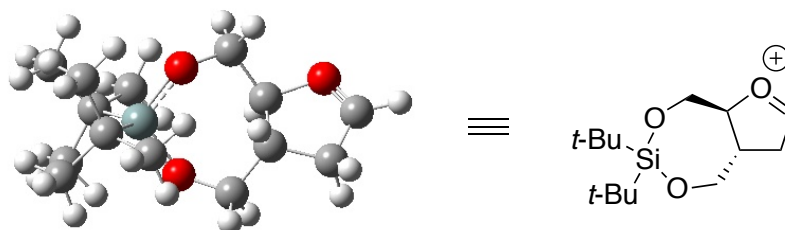

S1

(oxocarbenium ion intermediate resulting from acetate 6)

#p b3lyp/6-31+g(d,p) opt freq scrf=(solvent=dichloromethane)  
Number of imaginary frequencies = 0

|                                              |                             |
|----------------------------------------------|-----------------------------|
| Zero-point correction=                       | 0.395897 (Hartree/Particle) |
| Thermal correction to Energy=                | 0.417265                    |
| Thermal correction to Enthalpy=              | 0.418209                    |
| Thermal correction to Gibbs Free Energy=     | 0.347380                    |
| Sum of electronic and zero-point Energies=   | -1064.455314                |
| Sum of electronic and thermal Energies=      | -1064.433945                |
| Sum of electronic and thermal Enthalpies=    | -1064.433001                |
| Sum of electronic and thermal Free Energies= | -1064.503830                |

1 1

|   |            |             |             |
|---|------------|-------------|-------------|
| H | 4.17190200 | 1.86435400  | 0.65202500  |
| C | 3.79256200 | 0.84290200  | 0.75832500  |
| C | 2.29224000 | 0.64230700  | 0.43794300  |
| C | 2.25778100 | -0.68192700 | -0.33834300 |
| O | 3.69873900 | -0.87705100 | -0.77990000 |
| C | 4.45777200 | -0.07112000 | -0.17893400 |
| H | 4.07821600 | 0.51982200  | 1.77469600  |
| H | 1.96756500 | 1.44678200  | -0.22760000 |
| H | 2.07899700 | -1.54928800 | 0.30044200  |
| H | 5.52222900 | -0.14093500 | -0.39865400 |
| C | 1.37558700 | 0.59237500  | 1.67010300  |
| H | 1.26773900 | 1.59886400  | 2.08925100  |

|    |             |             |             |
|----|-------------|-------------|-------------|
| H  | 1.83003600  | -0.04569500 | 2.43739900  |
| C  | 1.38220000  | -0.69204800 | -1.59779000 |
| H  | 1.25534400  | -1.71780300 | -1.95880000 |
| H  | 1.88457600  | -0.11147000 | -2.37989800 |
| O  | 0.10290200  | 0.04019400  | 1.37518100  |
| Si | -0.87348000 | 0.00305900  | 0.00763200  |
| O  | 0.13422700  | -0.08338100 | -1.34440100 |
| C  | -1.80991000 | 1.65481800  | -0.25338100 |
| C  | -0.80591200 | 2.82200600  | -0.09529100 |
| H  | -0.37806300 | 2.86555300  | 0.91195200  |
| H  | -1.32186500 | 3.77593100  | -0.26863400 |
| H  | 0.01282500  | 2.75971900  | -0.82035100 |
| C  | -2.41915700 | 1.73118200  | -1.67347900 |
| H  | -3.16638800 | 0.95195100  | -1.85128200 |
| H  | -1.65046400 | 1.64571800  | -2.44782000 |
| H  | -2.92017800 | 2.70014700  | -1.80436900 |
| C  | -2.93440300 | 1.83311100  | 0.79241300  |
| H  | -3.72837600 | 1.08894000  | 0.67629100  |
| H  | -3.39660800 | 2.82200500  | 0.66995600  |
| H  | -2.55955300 | 1.77201800  | 1.82048400  |
| C  | -1.87877600 | -1.61189000 | 0.23246300  |
| C  | -0.90754600 | -2.81239900 | 0.12537300  |
| H  | -1.45994700 | -3.74736400 | 0.28958300  |
| H  | -0.11489300 | -2.76702100 | 0.88026000  |
| H  | -0.44505600 | -2.88315900 | -0.86487100 |
| C  | -2.55022200 | -1.65848600 | 1.62540200  |
| H  | -3.08318800 | -2.61204800 | 1.74241900  |
| H  | -3.28232400 | -0.85738900 | 1.76343000  |
| H  | -1.81372400 | -1.58656100 | 2.43175900  |
| C  | -2.96306000 | -1.76201800 | -0.85940400 |
| H  | -3.46166100 | -2.73477300 | -0.75136100 |
| H  | -2.54296700 | -1.71985900 | -1.87078100 |
| H  | -3.73732700 | -0.99224300 | -0.78182200 |

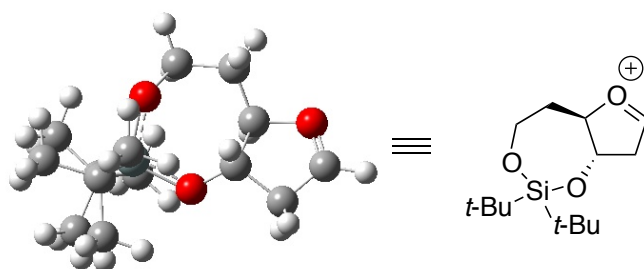

S2

(oxocarbenium ion intermediate resulting from acetate 7)

#p b3lyp/6-31+g(d,p) opt freq scrf=(solvent=dichloromethane)  
Number of imaginary frequencies = 0

|                                              |                             |
|----------------------------------------------|-----------------------------|
| Zero-point correction=                       | 0.395921 (Hartree/Particle) |
| Thermal correction to Energy=                | 0.417022                    |
| Thermal correction to Enthalpy=              | 0.417966                    |
| Thermal correction to Gibbs Free Energy=     | 0.347911                    |
| Sum of electronic and zero-point Energies=   | -1064.460753                |
| Sum of electronic and thermal Energies=      | -1064.439652                |
| Sum of electronic and thermal Enthalpies=    | -1064.438708                |
| Sum of electronic and thermal Free Energies= | -1064.508763                |

|     |             |             |             |
|-----|-------------|-------------|-------------|
| 1 1 |             |             |             |
| H   | -2.80743600 | 1.99547800  | -1.92423600 |
| C   | -2.78888000 | 0.95485800  | -1.58969000 |
| C   | -1.78313600 | 0.60929300  | -0.47003200 |
| C   | -2.49638400 | -0.53731400 | 0.28171900  |
| O   | -3.96553500 | -0.22454000 | 0.00775600  |
| C   | -4.06466200 | 0.53388300  | -0.99612100 |
| H   | -2.61899600 | 0.33114400  | -2.48467000 |
| H   | -1.69836500 | 1.47316400  | 0.20005800  |
| H   | -5.07240200 | 0.78849700  | -1.32217000 |
| H   | -2.34850900 | -1.48883900 | -0.23807200 |
| C   | -2.26698000 | -0.65601600 | 1.77152300  |
| H   | -2.96911000 | -1.38316100 | 2.19370800  |
| H   | -2.43774500 | 0.30982600  | 2.25848400  |
| O   | -0.53277800 | 0.21166600  | -0.95993400 |
| Si  | 0.81025700  | 0.00433700  | 0.08170500  |
| O   | 0.16228100  | -0.24169200 | 1.60895900  |
| C   | -0.83966600 | -1.14799500 | 2.06880300  |
| H   | -0.72522100 | -1.23104600 | 3.15267200  |
| H   | -0.69008800 | -2.14730600 | 1.64419900  |
| C   | 1.72897700  | -1.54188500 | -0.58912000 |
| C   | 2.61402800  | -1.19336400 | -1.80924500 |
| H   | 3.41926200  | -0.49735700 | -1.55617200 |
| H   | 2.03375400  | -0.75933000 | -2.63116300 |
| H   | 3.08515500  | -2.10964900 | -2.18944700 |
| C   | 0.70854500  | -2.61760600 | -1.03716500 |
| H   | 0.04499500  | -2.25115000 | -1.82584500 |
| H   | 0.08817800  | -2.97950500 | -0.21052900 |
| H   | 1.25073800  | -3.48779600 | -1.43088600 |
| C   | 2.61884100  | -2.14677600 | 0.52468900  |
| H   | 3.39700200  | -1.45550100 | 0.86234500  |
| H   | 3.12277500  | -3.04458800 | 0.14252700  |
| H   | 2.03438700  | -2.44510800 | 1.40143400  |

|   |             |            |             |
|---|-------------|------------|-------------|
| C | 1.76292800  | 1.66098000 | 0.22099700  |
| C | 2.01114000  | 2.26512100 | -1.18183700 |
| H | 2.50929700  | 3.23826300 | -1.07710000 |
| H | 1.07392800  | 2.42996700 | -1.72405300 |
| H | 2.65382900  | 1.63646300 | -1.80414200 |
| C | 3.11611200  | 1.46529800 | 0.94380200  |
| H | 3.61372000  | 2.43750200 | 1.06042100  |
| H | 3.79872700  | 0.81843200 | 0.38376100  |
| H | 2.98870500  | 1.03975200 | 1.94530500  |
| C | 0.92040500  | 2.67212000 | 1.03724000  |
| H | 1.47776000  | 3.61383800 | 1.13166800  |
| H | 0.70174500  | 2.30699700 | 2.04451100  |
| H | -0.02904000 | 2.91322500 | 0.54590900  |

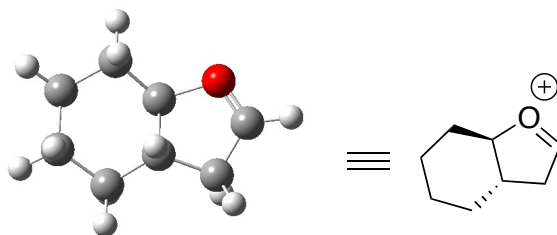

S3

**(oxocarbenium ion intermediate leading to allylated product 3)**

#p mp2/6-31+g(d,p) opt freq scrf=(solvent=dichloromethane)  
Number of imaginary frequencies = 0

|                                              |                             |
|----------------------------------------------|-----------------------------|
| Zero-point correction=                       | 0.204087 (Hartree/Particle) |
| Thermal correction to Energy=                | 0.211473                    |
| Thermal correction to Enthalpy=              | 0.212418                    |
| Thermal correction to Gibbs Free Energy=     | 0.172572                    |
| Sum of electronic and zero-point Energies=   | -386.310722                 |
| Sum of electronic and thermal Energies=      | -386.303335                 |
| Sum of electronic and thermal Enthalpies=    | -386.302391                 |
| Sum of electronic and thermal Free Energies= | -386.342237                 |

|     |             |             |             |
|-----|-------------|-------------|-------------|
| 1 1 |             |             |             |
| H   | -0.83568600 | -2.50777700 | 0.20943900  |
| C   | -0.84708300 | -1.50484400 | -0.21610600 |
| C   | -2.14907900 | 0.72031100  | -0.24436600 |
| C   | 0.31097400  | 0.73005900  | -0.27583500 |
| C   | -0.90678300 | 1.50406100  | 0.21150900  |
| C   | 0.26341900  | -0.65665600 | 0.31830500  |
| C   | -2.13110000 | -0.74887300 | 0.20302100  |

|   |             |             |             |
|---|-------------|-------------|-------------|
| H | -2.20858200 | 0.76499400  | -1.33593100 |
| H | 0.23485200  | 0.62664400  | -1.36440400 |
| H | -0.88444700 | 1.59562900  | 1.30121800  |
| H | 0.27485400  | -0.64283000 | 1.41151300  |
| H | -2.22626400 | -0.79935800 | 1.29164500  |
| H | -0.77748300 | -1.57725200 | -1.30287800 |
| H | -3.04981800 | 1.20030400  | 0.14164900  |
| H | -0.91237400 | 2.51150100  | -0.20629900 |
| H | -2.99311200 | -1.27193200 | -0.21240900 |
| C | 1.74559000  | 1.15782800  | 0.04387600  |
| H | 2.18751500  | 1.91340500  | -0.60340800 |
| H | 1.86707300  | 1.49136300  | 1.08462300  |
| O | 1.68636000  | -1.16279300 | 0.00584900  |
| C | 2.43707200  | -0.14632800 | -0.07942200 |
| H | 3.49452800  | -0.33569600 | -0.22744300 |

**2. Transition States for Nucleophilic Additions of Allyltrimethylsilane to Oxocarbenium Ions 26 and 29 Calculated with PCM(CH<sub>2</sub>Cl<sub>2</sub>)-M062X/631+G\*\* method at 195 K**

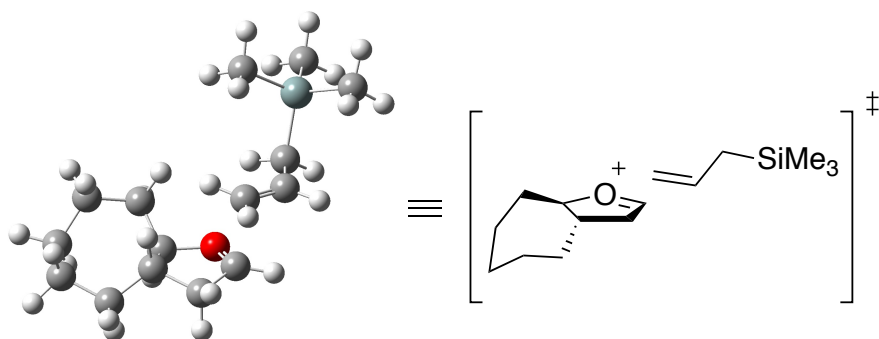

**S4**

**(synclinal transition state for the inside attack of the allyltrimethylsilane to oxocarbenium ion 26)**

*#p M062x/6-31+G\* opt=(readfc,ts,noeigen) Temperature=195 freq guess=(mix,always)  
 SCRF=(Solvent=Dichloromethane) scf=novaracc SCF=Tight int=grid=ultrafine  
 iop(1/8=5)*

Number of imaginary frequencies = 1

|                                 |                             |
|---------------------------------|-----------------------------|
| Zero-point correction=          | 0.415944 (Hartree/Particle) |
| Thermal correction to Energy=   | 0.425782                    |
| Thermal correction to Enthalpy= | 0.426399                    |



|                                              |             |
|----------------------------------------------|-------------|
| Thermal correction to Gibbs Free Energy=     | 0.388304    |
| Sum of electronic and zero-point Energies=   | -952.827213 |
| Sum of electronic and thermal Energies=      | -952.817376 |
| Sum of electronic and thermal Enthalpies=    | -952.816758 |
| Sum of electronic and thermal Free Energies= | -952.854854 |

1 1

|    |             |             |             |
|----|-------------|-------------|-------------|
| H  | -1.47314500 | 1.90276100  | -1.62744900 |
| C  | -1.61551500 | 1.41694500  | -0.65699900 |
| H  | -0.64661400 | 1.43088800  | -0.14261700 |
| C  | -2.65229400 | 2.18480600  | 0.18615800  |
| H  | -2.42215800 | 2.05387300  | 1.25089100  |
| H  | -2.51675200 | 3.25012800  | -0.02233600 |
| C  | -4.12752500 | 1.80044900  | -0.03715600 |
| H  | -4.32524700 | 1.61363200  | -1.10226700 |
| H  | -4.74398000 | 2.66422500  | 0.23294800  |
| C  | -4.60366900 | 0.61400600  | 0.81761000  |
| H  | -4.33868400 | 0.81984700  | 1.86359800  |
| H  | -5.69756000 | 0.56494200  | 0.78117800  |
| C  | -2.53424500 | -0.81309000 | 0.31882100  |
| H  | -2.08768000 | -0.40933700 | 1.23696200  |
| C  | -2.03167100 | -0.02107500 | -0.89276500 |
| H  | -2.74647700 | -0.09616400 | -1.71842400 |
| C  | -1.96032500 | -2.21268600 | 0.05788500  |
| H  | -2.62971400 | -2.79712900 | -0.59589900 |
| H  | -1.75181900 | -2.81489700 | 0.94119100  |
| O  | -0.86115000 | -0.79429000 | -1.39219700 |
| C  | -0.76752200 | -1.91760600 | -0.78559600 |
| H  | -0.08707200 | -2.64437100 | -1.21409000 |
| C  | 0.67980400  | -1.37452500 | 1.04889500  |
| H  | 0.43233000  | -2.15663200 | 1.75958500  |
| H  | 0.20281400  | -0.40542700 | 1.18345900  |
| C  | 1.70193600  | -1.52273900 | 0.17152300  |
| C  | -4.05893200 | -0.76457700 | 0.42936100  |
| H  | -4.48763800 | -1.07984600 | -0.53202500 |
| H  | -4.38388700 | -1.49929000 | 1.17465300  |
| H  | 2.20433700  | -2.49046100 | 0.13447900  |
| C  | 2.20671300  | -0.47754500 | -0.73297600 |
| H  | 2.57230700  | -0.90051800 | -1.67556400 |
| H  | 1.44195900  | 0.27944800  | -0.94929100 |
| Si | 3.67117100  | 0.46790200  | 0.08886300  |
| C  | 4.36742200  | 1.62955100  | -1.21146200 |
| H  | 5.18851100  | 2.22377800  | -0.79538000 |
| H  | 4.75625300  | 1.07054000  | -2.06941300 |
| H  | 3.59981800  | 2.32167200  | -1.57433700 |
| C  | 4.96139600  | -0.77580100 | 0.65120900  |

|   |            |             |             |
|---|------------|-------------|-------------|
| H | 4.56424800 | -1.43741900 | 1.42922000  |
| H | 5.30285800 | -1.39720300 | -0.18413600 |
| H | 5.83500300 | -0.26026700 | 1.06527400  |
| C | 2.97353700 | 1.42170300  | 1.54910900  |
| H | 3.75637600 | 2.02602600  | 2.02088200  |
| H | 2.17180100 | 2.09829500  | 1.23069700  |
| H | 2.56795800 | 0.74569900  | 2.31000800  |

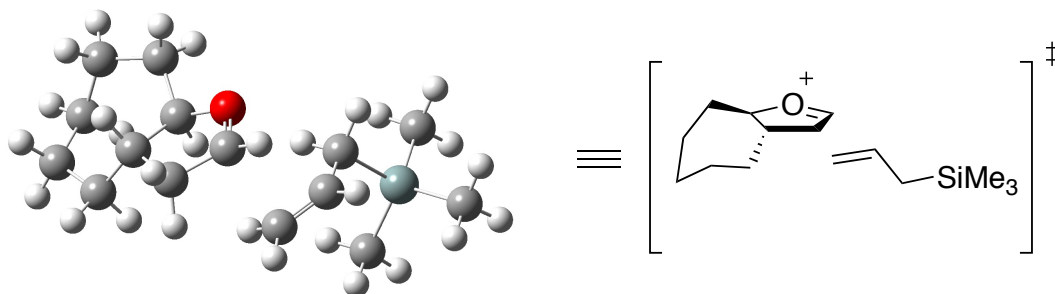

S5

**(synclinal transition state for the outside attack of the allyltrimethylsilane to oxocarbenium ion 26)**

*#p M062x/6-31+G\* opt=(readfc,ts,noeigen) Temperature=195 freq guess=(mix,always)  
 SCRF=(Solvent=Dichloromethane) scf=novaracc SCF=Tight int=grid=ultrafine  
 iop(1/8=5)*

Number of imaginary frequencies = 1

|                                              |                             |
|----------------------------------------------|-----------------------------|
| Zero-point correction=                       | 0.416028 (Hartree/Particle) |
| Thermal correction to Energy=                | 0.425942                    |
| Thermal correction to Enthalpy=              | 0.426559                    |
| Thermal correction to Gibbs Free Energy=     | 0.388159                    |
| Sum of electronic and zero-point Energies=   | -952.824548                 |
| Sum of electronic and thermal Energies=      | -952.814634                 |
| Sum of electronic and thermal Enthalpies=    | -952.814016                 |
| Sum of electronic and thermal Free Energies= | -952.852416                 |

1 1

|   |            |            |             |
|---|------------|------------|-------------|
| H | 1.63208500 | 1.91395000 | -1.66599500 |
| C | 2.39897500 | 1.15341500 | -1.48630900 |
| H | 2.65262900 | 0.70912700 | -2.45535500 |
| C | 3.65455600 | 1.79172000 | -0.86258500 |
| H | 4.53930400 | 1.21306800 | -1.15543800 |
| H | 3.77761900 | 2.77989300 | -1.31558200 |
| C | 3.65484300 | 1.92531600 | 0.67191200  |

|    |             |             |             |
|----|-------------|-------------|-------------|
| H  | 2.66006600  | 2.21598100  | 1.03884100  |
| H  | 4.32309000  | 2.75097300  | 0.93828000  |
| C  | 4.15881000  | 0.67359800  | 1.40913700  |
| H  | 5.12697600  | 0.38991100  | 0.97467900  |
| H  | 4.35518300  | 0.93102300  | 2.45588900  |
| C  | 2.76573300  | -0.95662900 | -0.00480000 |
| H  | 3.62905600  | -1.06762000 | -0.67284300 |
| C  | 1.80806800  | 0.07647000  | -0.60149600 |
| H  | 1.18240800  | 0.51341000  | 0.18646400  |
| C  | 1.94278400  | -2.26412600 | -0.03274400 |
| H  | 1.61217800  | -2.58816100 | 0.95645000  |
| H  | 2.48503400  | -3.10588200 | -0.47804100 |
| O  | 0.86074800  | -0.73155800 | -1.40497000 |
| C  | 0.80244000  | -1.92390800 | -0.94475100 |
| H  | 0.21648000  | -2.63284900 | -1.51850300 |
| C  | -0.85862100 | -1.80454300 | 0.77484300  |
| H  | -0.78386900 | -2.82878700 | 1.12782700  |
| H  | -0.32283800 | -1.04131900 | 1.33956200  |
| C  | 3.23291100  | -0.54690500 | 1.39306900  |
| H  | 2.34384800  | -0.35187500 | 2.01058600  |
| H  | 3.75400800  | -1.39294100 | 1.85478100  |
| C  | -2.02356900 | -0.09415700 | -0.64714000 |
| H  | -1.22587500 | 0.60518600  | -0.36692600 |
| H  | -2.17103000 | -0.05848700 | -1.73326000 |
| C  | -1.75131500 | -1.46191200 | -0.18479200 |
| H  | -2.32100700 | -2.26225000 | -0.65969100 |
| Si | -3.64220000 | 0.57798300  | 0.15996000  |
| C  | -3.95666300 | 2.26845400  | -0.59361500 |
| H  | -4.10344100 | 2.19647000  | -1.67668200 |
| H  | -4.85579000 | 2.72009800  | -0.15994600 |
| H  | -3.11576800 | 2.94519100  | -0.40697100 |
| C  | -5.04680700 | -0.60957500 | -0.22019400 |
| H  | -5.15772200 | -0.76171700 | -1.29958000 |
| H  | -4.88240800 | -1.58643900 | 0.24793300  |
| H  | -5.99392700 | -0.21233200 | 0.16144300  |
| C  | -3.34654000 | 0.70207400  | 2.01004900  |
| H  | -2.49106200 | 1.35099700  | 2.22961400  |
| H  | -4.22523600 | 1.12287300  | 2.51137600  |
| H  | -3.14881700 | -0.28254000 | 2.44790600  |

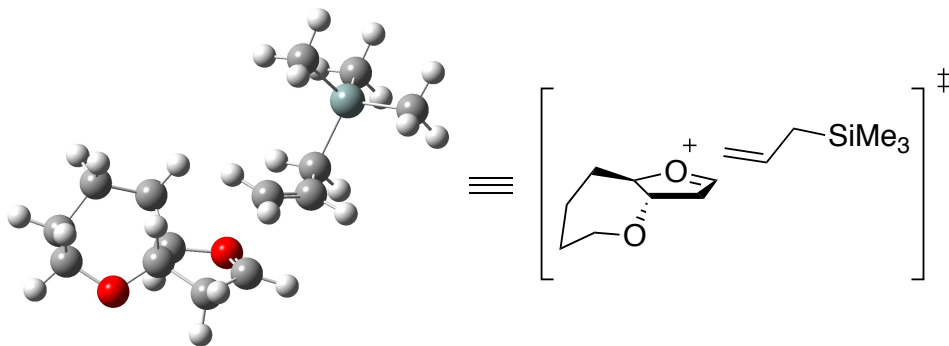

S6

**(synclinal transition state for the outside attack of the allyltrimethylsilane to oxocarbenium ion 27)**

*#p M062x/6-31+G\* opt=(readfc,ts,noeigen) Temperature=195 freq guess=(mix,always)  
 SCRF=(Solvent=Dichloromethane) scf=novaracc SCF=Tight int=grid=ultrafine  
 iop(1/8=5)*

Number of imaginary frequencies = 1

|                                              |                             |
|----------------------------------------------|-----------------------------|
| Zero-point correction=                       | 0.392001 (Hartree/Particle) |
| Thermal correction to Energy=                | 0.412474                    |
| Thermal correction to Enthalpy=              | 0.413418                    |
| Thermal correction to Gibbs Free Energy=     | 0.341819                    |
| Sum of electronic and zero-point Energies=   | -988.737221                 |
| Sum of electronic and thermal Energies=      | -988.716748                 |
| Sum of electronic and thermal Enthalpies=    | -988.715804                 |
| Sum of electronic and thermal Free Energies= | -988.787404                 |

|     |             |             |             |
|-----|-------------|-------------|-------------|
| 1 1 |             |             |             |
| H   | -1.64552500 | 2.01885600  | -1.60899700 |
| C   | -1.74165500 | 1.49799400  | -0.65197500 |
| H   | -0.76872300 | 1.55521900  | -0.15061400 |
| C   | -2.81746600 | 2.16542400  | 0.23149000  |
| H   | -2.54229400 | 2.05329400  | 1.28758800  |
| H   | -2.79670800 | 3.23919900  | 0.02682700  |
| C   | -4.25573800 | 1.64470100  | 0.05010100  |
| H   | -4.50611600 | 1.51742600  | -1.01079800 |
| H   | -4.94202000 | 2.40730500  | 0.43537400  |
| C   | -4.58553700 | 0.36409100  | 0.82205500  |
| H   | -4.29944600 | 0.48629500  | 1.87732700  |
| H   | -5.65768900 | 0.16495800  | 0.77689700  |
| C   | -2.58232400 | -0.77450600 | 0.28938400  |
| H   | -2.19487400 | -0.36562600 | 1.23407400  |
| C   | -2.08662100 | 0.04757500  | -0.91443800 |
| H   | -2.81289000 | -0.05837600 | -1.72553400 |
| C   | -1.98491700 | -2.15565300 | 0.01919700  |

|    |             |             |             |
|----|-------------|-------------|-------------|
| H  | -2.66225900 | -2.72043200 | -0.64262900 |
| H  | -1.77190200 | -2.76893400 | 0.89283300  |
| O  | -0.89650300 | -0.68939500 | -1.39722400 |
| C  | -0.79731500 | -1.82239000 | -0.81180900 |
| H  | -0.08343300 | -2.52473700 | -1.22553800 |
| C  | 0.63435400  | -1.26241700 | 1.11319800  |
| H  | 0.37935600  | -2.06339600 | 1.80008200  |
| H  | 0.16826100  | -0.29180800 | 1.28035100  |
| C  | 1.63656000  | -1.40069000 | 0.21382000  |
| H  | 2.12085700  | -2.37572000 | 0.13661700  |
| C  | 2.15114000  | -0.33545500 | -0.66413200 |
| H  | 2.40835300  | -0.72349200 | -1.65741900 |
| H  | 1.43291000  | 0.48684900  | -0.77422600 |
| Si | 3.75664600  | 0.42736000  | 0.07777400  |
| C  | 4.40035400  | 1.66905200  | -1.17485900 |
| H  | 5.30994000  | 2.15351000  | -0.80295200 |
| H  | 4.64254400  | 1.17973300  | -2.12443900 |
| H  | 3.65847700  | 2.45020000  | -1.37291400 |
| C  | 5.00075100  | -0.94995400 | 0.36895400  |
| H  | 4.64350200  | -1.65826900 | 1.12479600  |
| H  | 5.19964600  | -1.50630100 | -0.55380700 |
| H  | 5.95155600  | -0.53626700 | 0.72283700  |
| C  | 3.29300000  | 1.26499800  | 1.69328000  |
| H  | 4.16690100  | 1.75404100  | 2.13778400  |
| H  | 2.52406000  | 2.02962200  | 1.53448400  |
| H  | 2.90805300  | 0.54032200  | 2.41924100  |
| O  | -3.97988400 | -0.82849500 | 0.31826300  |

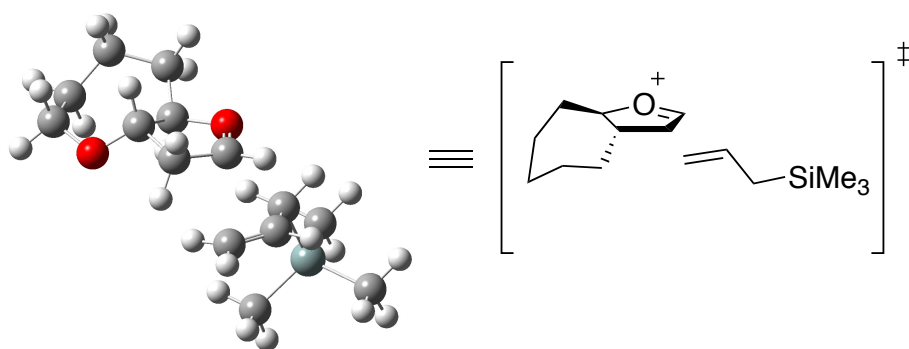

S7

(synclinal transition state for the outside attack of the allyltrimethylsilane to oxocarbenium ion 27)

#p M062x/6-31+G\* opt=(readfc,ts,noeigen) Temperature=195 freq guess=(mix,always)  
 SCRF=(Solvent=Dichloromethane) scf=novaracc SCF=Tight int=grid=ultrafine  
 iop(1/8=5)

Number of imaginary frequencies = 1

Zero-point correction= 0.392021 (Hartree/Particle)  
 Thermal correction to Energy= 0.412558  
 Thermal correction to Enthalpy= 0.413503  
 Thermal correction to Gibbs Free Energy= 0.341579  
 Sum of electronic and zero-point Energies= -988.735062  
 Sum of electronic and thermal Energies= -988.714524  
 Sum of electronic and thermal Enthalpies= -988.713580  
 Sum of electronic and thermal Free Energies= -988.785503

1 1  
 H 1.65357800 2.04792400 -1.55382800  
 C 2.40999200 1.26886800 -1.42081800  
 H 2.66441300 0.88288800 -2.41378400  
 C 3.67310100 1.84239300 -0.74343300  
 H 4.55756800 1.30763900 -1.11032100  
 H 3.78777100 2.87787900 -1.07499400  
 C 3.69090800 1.80098800 0.79586700  
 H 2.73049100 2.12313100 1.21841600  
 H 4.43496400 2.52618700 1.14446400  
 C 4.10648800 0.45825000 1.40394900  
 H 5.04936100 0.12404500 0.94591200  
 H 4.26522400 0.56647700 2.47840100  
 C 2.79644300 -0.89455400 -0.03166500  
 H 3.69350000 -0.96041500 -0.66414800  
 C 1.81859900 0.14996800 -0.59310600  
 H 1.20959100 0.53205100 0.23404100  
 C 1.99823100 -2.20684100 -0.09605600  
 H 1.67783600 -2.52533800 0.89824200  
 H 2.54991800 -3.03900900 -0.54597200  
 O 0.88199800 -0.64917700 -1.40954300  
 C 0.86011600 -1.85652400 -0.99822200  
 H 0.25082700 -2.55212400 -1.56374300  
 C -0.84754300 -1.81031600 0.82004200  
 H -0.75639500 -2.84631200 1.13406600  
 H -0.31601200 -1.06175300 1.40774200  
 C -1.99736200 -0.06652200 -0.57744100  
 H -1.22622300 0.63493000 -0.23430600  
 H -2.08214000 0.00319500 -1.66919000  
 C -1.71629200 -1.44914600 -0.15005000  
 H -2.26854900 -2.23948300 -0.66128500

|    |             |             |             |
|----|-------------|-------------|-------------|
| Si | -3.66924600 | 0.54925800  | 0.15226200  |
| C  | -3.96845400 | 2.26697000  | -0.54605900 |
| H  | -4.04208500 | 2.24145400  | -1.63873300 |
| H  | -4.90323800 | 2.68343000  | -0.15455600 |
| H  | -3.15586800 | 2.94970100  | -0.27469800 |
| C  | -5.03099600 | -0.63648100 | -0.36790500 |
| H  | -5.07154200 | -0.74058000 | -1.45789600 |
| H  | -4.88345200 | -1.63195500 | 0.06533800  |
| H  | -6.00558600 | -0.26718300 | -0.02960700 |
| C  | -3.50120600 | 0.59675800  | 2.02204000  |
| H  | -2.68044800 | 1.25517700  | 2.32817800  |
| H  | -4.42251800 | 0.97192900  | 2.48132000  |
| H  | -3.30535900 | -0.40203600 | 2.42743700  |
| O  | 3.14446000  | -0.59261300 | 1.29066400  |

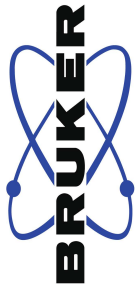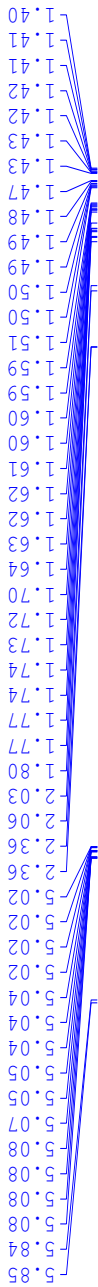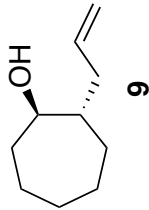

Current Data Parameters  
NAME VTT-III-36-B2  
EXPNO 2  
PROCNO 1

F2 - Acquisition Parameters  
Date\_ 20120213  
Time 11.46  
INSTRUM 5 mm BBO BB-1H  
PROBHD zg30  
PULPROG 65536  
TD 16  
SOLVENT CDC13  
NS 2  
DS 2  
SWH 10330.578 Hz  
FIDRES 0.157632 Hz  
AQ 3.1719923 sec  
RG 228.1  
DW 48.400 usec  
DE 6.50 usec  
TE 298.2 K  
D1 2.0000000 sec  
TDO 1

==== CHANNEL f1 =====  
NUC1 1H  
P1 9.20 usec  
PL1 -3.00 dB  
PL1W 37.58904266 W  
SF01 500.2020889 MHz

F2 - Processing parameters  
SI 32768  
SF 500.1990130 MHz  
WDW no  
SSB 0 Hz  
LB 0  
GB 0  
PC 1.00



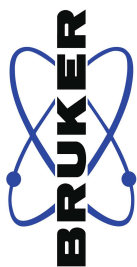

Current Data Parameters  
NAME VII-III-36-B2  
EXPNO 3  
PROCNO 1

F2 - Acquisition Parameters  
Date\_ 20120213  
Time 11.48  
INSTRUM spect  
PROBHD 5 mm BBO BB-1H  
PULPROG zgpg30  
TD 65536  
SOLVENT CDCl3  
NS 128  
DS 4  
SWH 30030.029 Hz  
FIDRES 0.458222 Hz  
AQ 1.0912244 sec  
RG 32768  
DW 16.650 usec  
DE 850 usec  
TE 298.6 K  
D1 2.00000000 sec  
D11 0.03000000 sec  
TD0 1

===== CHANNEL f1 =====  
NUC1 13C  
P1 9.75 usec  
PL1 2.00 dB  
PL1W 49.29017639 W  
SFO1 125.7877161 MHz  
===== CHANNEL f2 =====  
CFPRNG2 waltz16  
NUC2 1H  
PCPD2 70.00 usec  
PCPD1 -3.00 dB  
PL12 13.50 dB  
PL13 13.50 dB  
PL1Z 13.50 dB  
PL1ZW 37.58904266 W  
PL12W 0.84151381 W  
PL13W 0.84151381 W  
SFO2 500.2010008 MHz

F2 - Processing parameters  
SI 32768  
SF 125.7751128 MHz  
WDW EM  
SSB 0  
LB 1.00 Hz  
GB 0  
PC 1.40

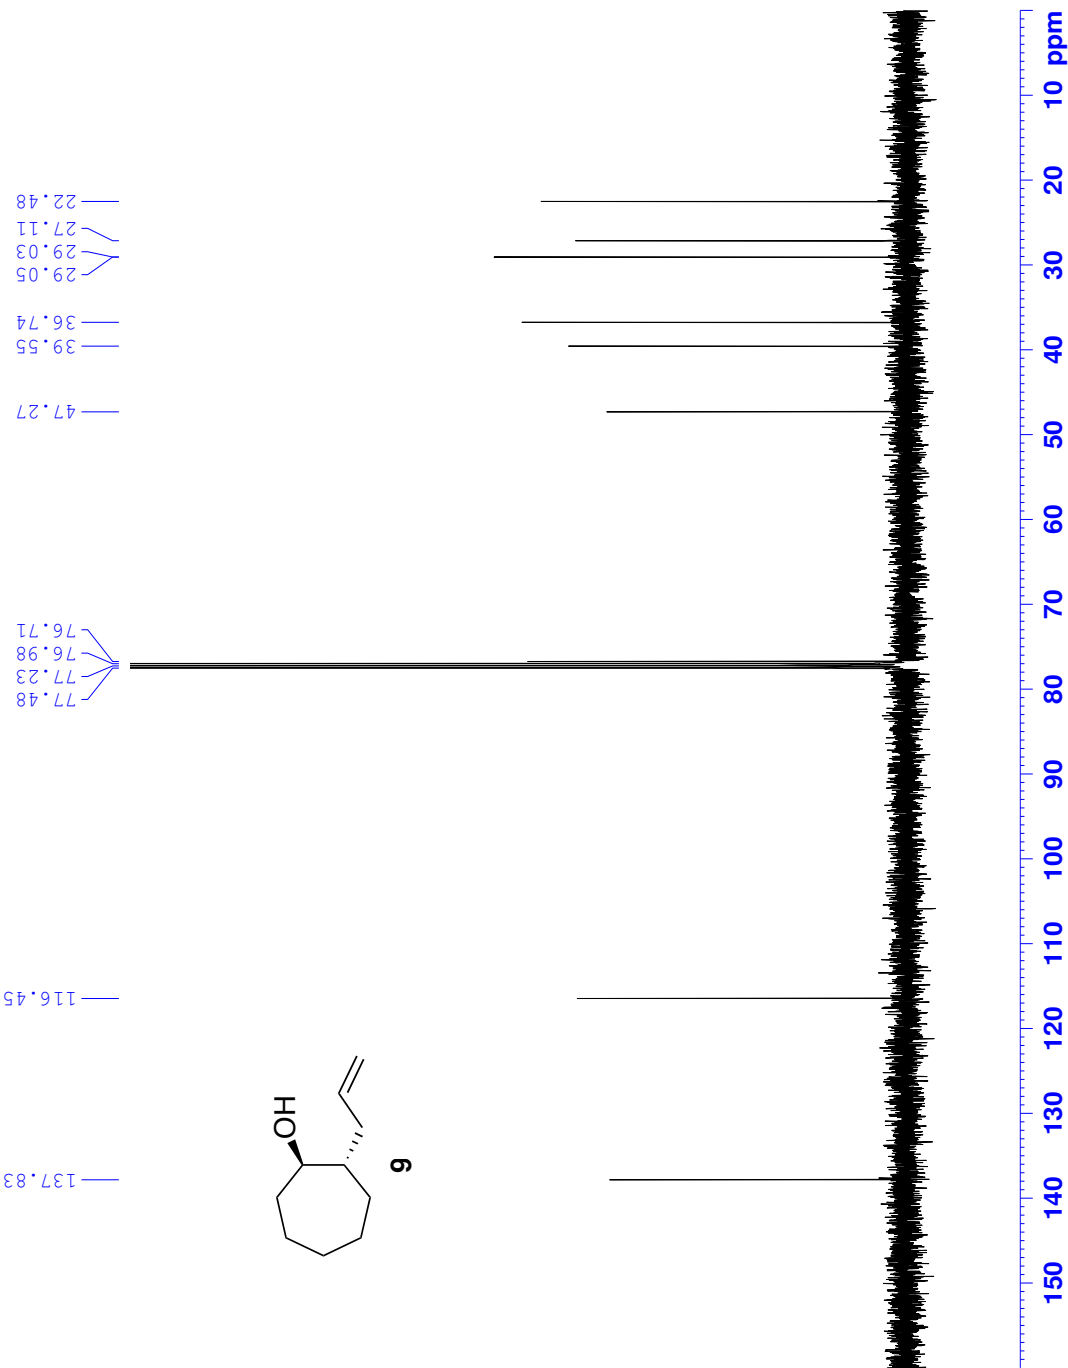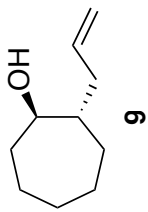

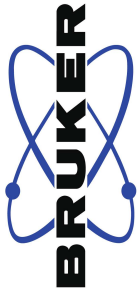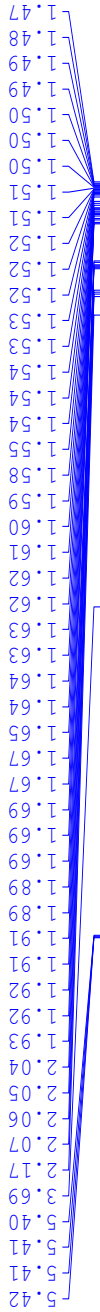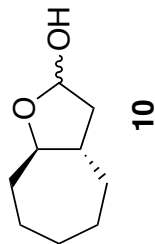

Current Data Parameters  
NAME VTT-III-39-A  
EXPNO 1  
PROCNO 1

F2 - Acquisition Parameters  
Date\_ 20120208  
Time 13.03  
INSTRUM spect  
PROBHD 5 mm PAQXI 1H/  
PULPROG zg30  
TD 65536  
SOLVENT CDC13  
NS 16  
DS 2  
SWH 12335.526 Hz  
FIDRES 0.188225 Hz  
AQ 2.6564426 sec  
RG 113.19  
DW 40.533 usec  
DE 6.50 usec  
TE 298.1 K  
D1 1.00000000 sec  
TD0 1

==== CHANNEL f1 =====  
NUC1 1H  
P1 9.79 usec  
PLW1 9.30000019 W  
SF01 600.1937064 MHz

F2 - Processing parameters  
SI 65536  
SF 600.1900131 MHz  
WDW EM  
SSB 0  
LB 0 0.30 Hz  
GB 0  
PC 1.00

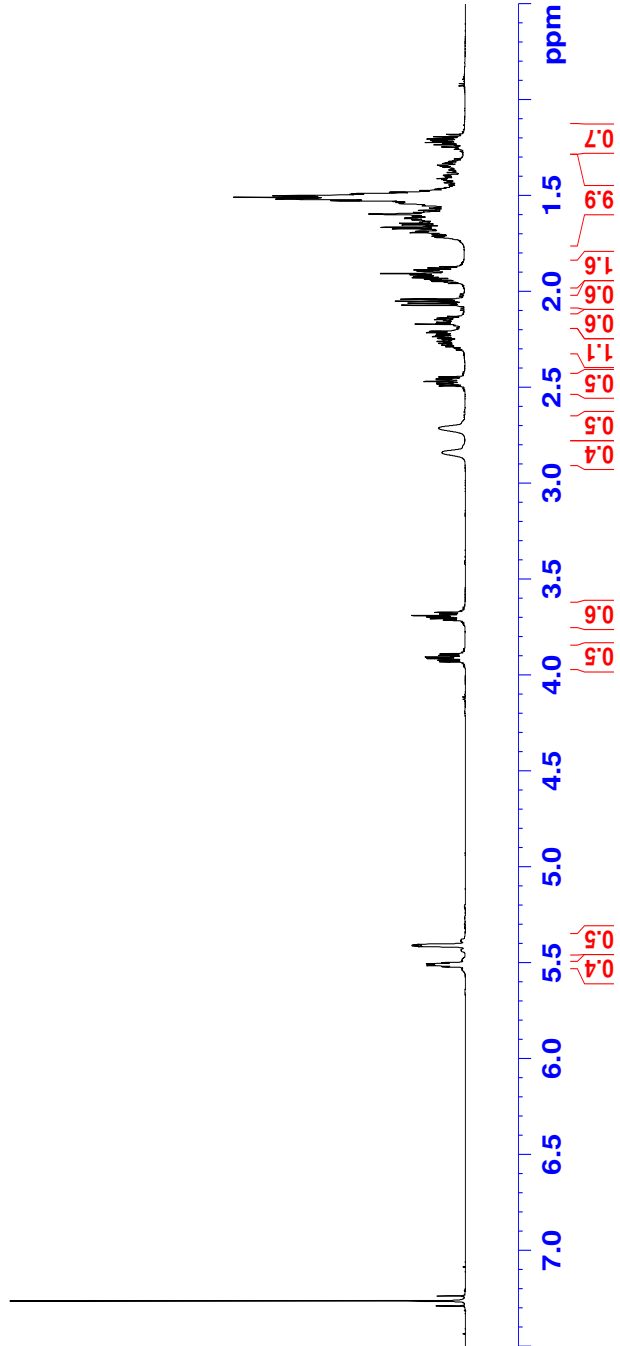

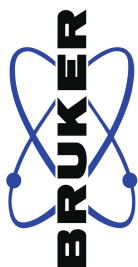

Current Data Parameters  
NAME VTI-III-39-A  
EXPNO 2  
PROCNO 1

F2 - Acquisition Parameters  
Date\_ 20120208  
Time 13.05  
INSTRUM spect  
PROBHD 5 mm PAQXI\_H/  
PULPROG zgpg30  
TD 65536  
SOLVENT CDCl3  
NS 111  
DS 4  
SWH 36057.691 Hz  
FIDRES 0.550197 Hz  
AQ 0.9088159 sec  
RG 184.65  
DW 13.867 usec  
DE 6.50 usec  
TE 298.1 K  
D1 2.0000000 sec  
D11 0.03000000 sec  
TD0 1

==== CHANNEL f1 =====  
NUC1 13C  
P1 15.00 usec  
PLW1 106.0000000 W  
SFO1 150.9329866 MHz  
  
==== CHANNEL f2 =====  
CFDPRG2 waltz16  
NUC2 1H  
PCPD2 70.00 usec  
PLW2 9.30000019 W  
PLWI2 0.18190999 W  
PLWI3 0.08913500 W  
SFO2 600.1924008 MHz

F2 - Processing parameters  
SI 32768  
SF 150.9178639 MHz  
WDW EM  
SSB 0  
LB 1.00 Hz  
GB 0  
PC 1.40

45.00  
43.04  
42.64  
41.72  
35.43  
33.08  
30.33  
29.59  
28.25  
28.00  
26.08  
25.77  
25.65  
25.11

98.37  
98.22  
85.89  
82.92  
77.44  
77.23  
77.02

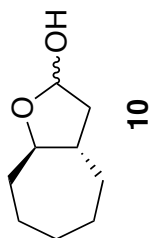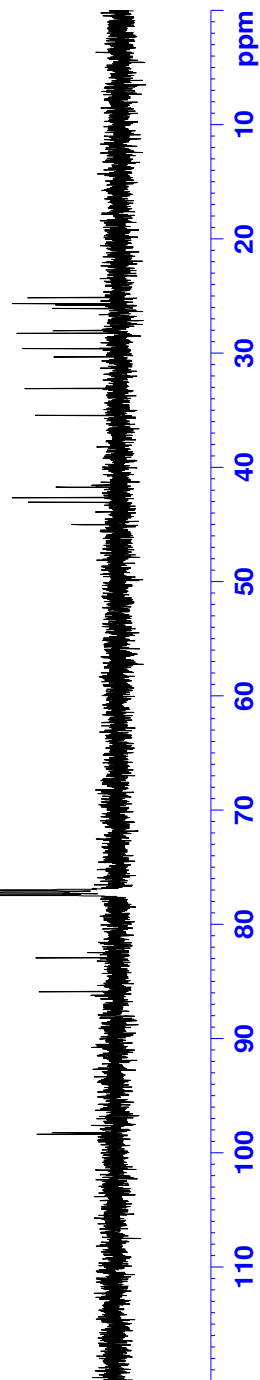

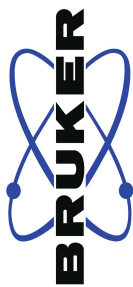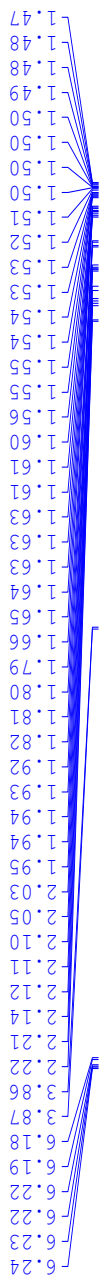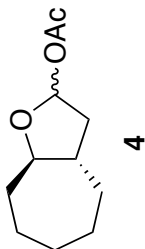

Current Data Parameters  
NAME VTT-III-41-A2  
EXPNO 1  
PROCNO 1

F2 - Acquisition Parameters  
Date\_ 20120213  
Time 12.17  
INSTRUM spect  
PROBHD 5 mm BBO BB-1H  
PULPROG zg30  
TD 65536  
SOLVENT CDCl3  
NS 16  
DS 2  
SWH 10330.578 Hz  
FIDRES 0.157632 Hz  
AQ 3.1719923 sec  
RG 114  
DW 48.400 usec  
DE 6.50 usec  
TE 296.2 K  
D1 2.00000000 sec  
TD0 1

==== CHANNEL f1 =====  
NUC1 1H  
P1 9.20 usec  
PL1 -3.00 dB  
PL1W 37.58904266 W  
SFO1 500.2020889 MHz

F2 - Processing parameters  
SI 32768  
SF 500.1990083 MHz  
WDW no  
SSB 0  
LB 0 Hz  
GB 0  
PC 1.00

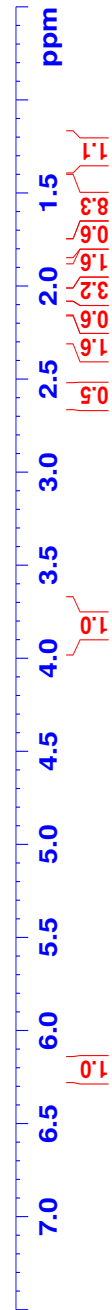

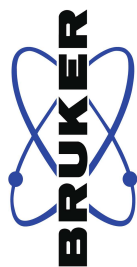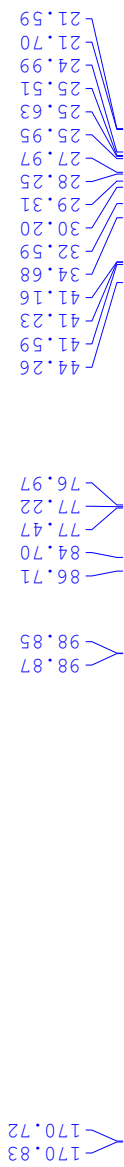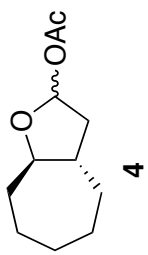

Current Data Parameters  
 NAME VTI-III-41-A2  
 EXPNO 2  
 PROCNO 1

F2 - Acquisition Parameters  
 Date\_ 20120213  
 Time\_ 12.19  
 INSTRUM spect  
 PROBHD 5 mm BBO BB-1H  
 PULPROG zgpg30  
 ID 65536  
 SOLVENT CDC13  
 NS 128  
 DS 4  
 SWH 30030.029 Hz  
 FIDRES 0.458222 Hz  
 AQ 1.0912244 sec  
 RG 32768  
 DW 16.650 usec  
 DE 0.000000 sec  
 TE 298.5 K  
 D1 2.0000000 sec  
 D11 0.0300000 sec  
 TDO 1

===== CHANNEL f1 =====  
 NUC1 13C  
 P1 9.75 usec  
 PL1 2.00 dB  
 PL1W 49.29017639 W  
 SF01 125.7877161 MHz

===== CHANNEL f2 =====  
 CPDPRG2 waltz16  
 NUC2 1H  
 P2 70.00 usec  
 PL2 13.50 dB  
 PL12 13.50 dB  
 PL13 13.50 dB  
 PL14 13.50 dB  
 PL1W 37.58904266 W  
 SF02 500.2010008 MHz

F2 - Processing parameters  
 SI 32768  
 SF 125.7751165 MHz  
 WDW no  
 SSB 0 Hz  
 LB 0  
 GB 0  
 PC 1.40

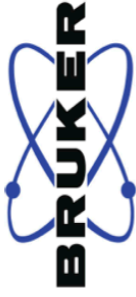

Current Data Parameters  
NAME VII-IV-73-A2  
EXPNO 1  
PROCNO 1

F2 - Acquisition Parameters  
Date\_ 20130228  
Time 14.16  
INSTRUM spect  
PROBHD 5 mm PAQXI 1H/  
PULPROG zg30  
ID 65536  
SOLVENT CDCl3  
NS 8  
DS 0  
SWH 12335.526 Hz  
FIDRES 0.188225 Hz  
AQ 2.6564426 sec  
RG 184.65  
DW 40.533 usec  
DE 6.50 usec  
TE 298.2 K  
D1 2.0000000 sec  
TD0 1

==== CHANNEL f1 =====  
NUC1 1H  
P1 9.79 usec  
PL1 9.3000019 W  
SFO1 600.1937064 MHz  
F2 - Processing parameters  
SI 65536  
SF 600.1900139 MHz  
WDW EM  
SSB 0  
LB 0.30 Hz  
GB 0  
PC 1.00

5.48  
5.47  
5.46  
5.46  
5.45  
5.45  
3.88  
3.87  
3.86  
3.85  
3.84  
3.82  
3.81  
3.80  
3.79  
3.79  
3.78  
3.78  
3.76  
3.75  
3.74  
2.63  
2.63  
2.62  
2.61  
2.61  
2.23  
2.22  
2.21  
2.20  
2.19  
2.18  
2.17  
1.86  
1.85  
1.84  
1.84  
1.83  
1.82  
1.82  
1.81  
1.80  
1.80  
1.79  
1.79  
1.78  
1.78  
1.77  
1.76  
1.55

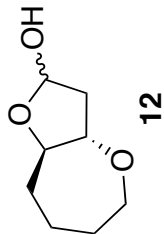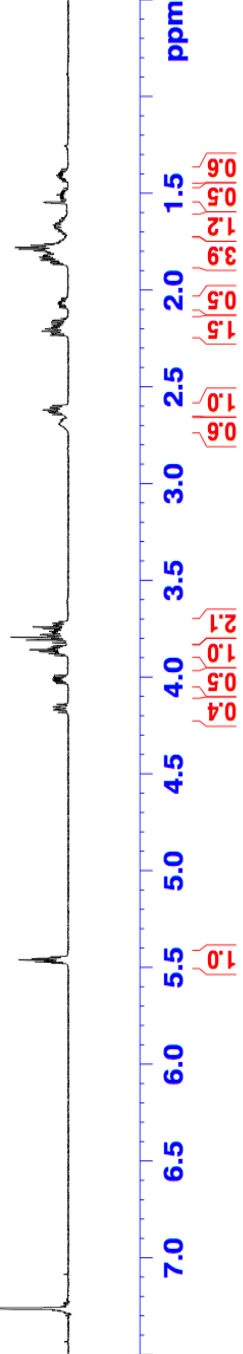

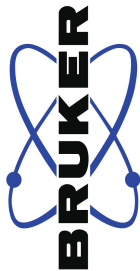

Current Data Parameters  
NAME VTT-IV-73-A  
EXPNO 2  
PROCNO 1

F2 - Acquisition Parameters

Date\_ 20130213  
Time 17.20  
INSTRUM spect  
PROBHD 5 mm PAOXI 1H/  
PULPROG zgpg30  
TD 65336  
SOLVENT CDC13  
NS 128  
DS 0  
SWH 36057.691 Hz  
FIDRES 0.550197 Hz  
AQ 0.9088159 sec  
RG 184.65  
DW 13.867 usec  
DE 6.50 usec  
TE 298.1 K  
D1 2.5000000 sec  
D11 0.03000000 sec  
TD0 1

==== CHANNEL f1 =====  
NUC1 13C  
PI 15.00 usec  
PLW1 106.00000000 W  
SFO1 150.9329866 MHz

==== CHANNEL f2 =====  
CPDPRG2 waltz16  
NUC2 1H  
PCPD2 70.00 usec  
PLW2 9.30000019 W  
PLW12 0.18190999 W  
PLW13 0.08913500 W  
SFO2 600.1924008 MHz

F2 - Processing parameters

SI 32768  
SF 150.9178634 MHz  
WDW EM  
SSB 0  
LB 1.00 Hz  
GB 0  
PC 1.40

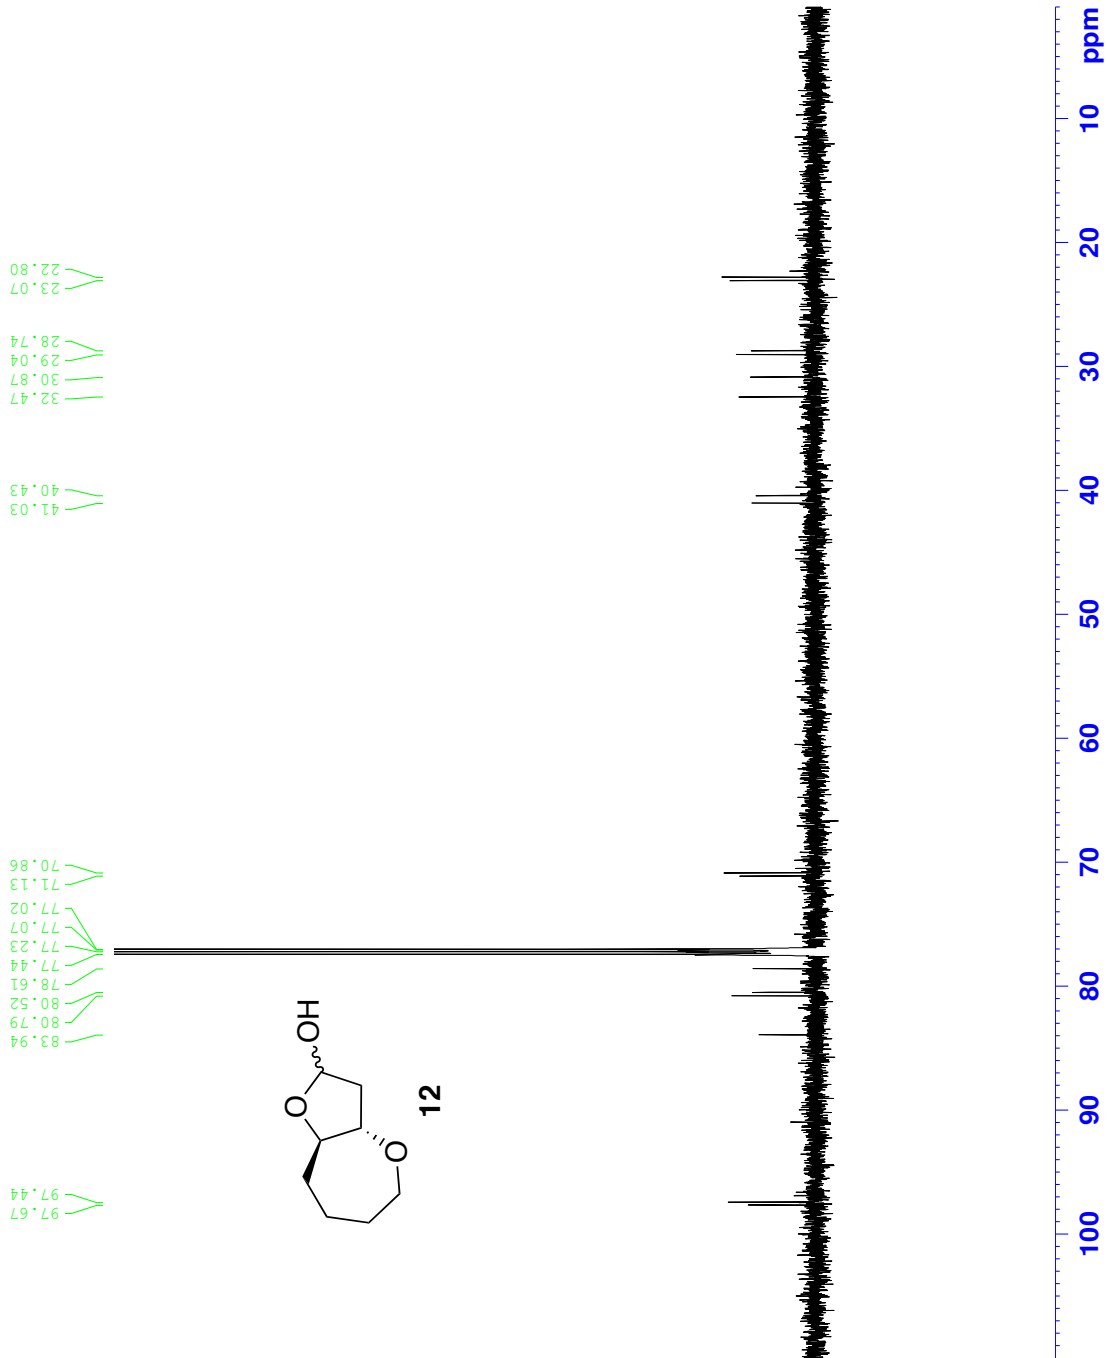





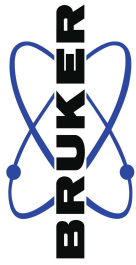

Current Data Parameters  
NAME VTI-III-186-A  
EXPNO 2  
PROCNO 1

F2 - Acquisition Parameters  
Date\_ 20120730  
Time 21.59  
INSTRUM spect  
PROBHD 5 mm PABBO BB/  
PULPROG zgpg30  
TD 65536  
SOLVENT CDCl3  
NS 128  
DS 4  
SWH 36067.691 Hz  
FIDRES 0.550197 Hz  
AQ 0.9088159 sec  
RG 184.65  
DW 13.867 usec  
DE 6.50 usec  
TE 298.1 K  
D1 2.5000000 sec  
D11 0.0300000 sec  
TDO 1

==== CHANNEL f1 =====  
NUC1 <sup>13</sup>C  
P1 10.00 usec  
PL1 104.0000000 W  
SFO1 150.9329866 MHz

==== CHANNEL f2 =====  
CPDPRG2 waltz16  
NUC2 <sup>1</sup>H  
PCPD2 1H  
PLW2 70.00 usec  
PLM12 26.50000000 W  
PLM13 0.65438998 W  
SFO2 600.1924008 MHz

F2 - Processing parameters  
SI 32768  
SF 150.9178600 MHz  
WDW EM  
SSB 0  
LB 1.00 Hz  
GB 0  
PC 1.40

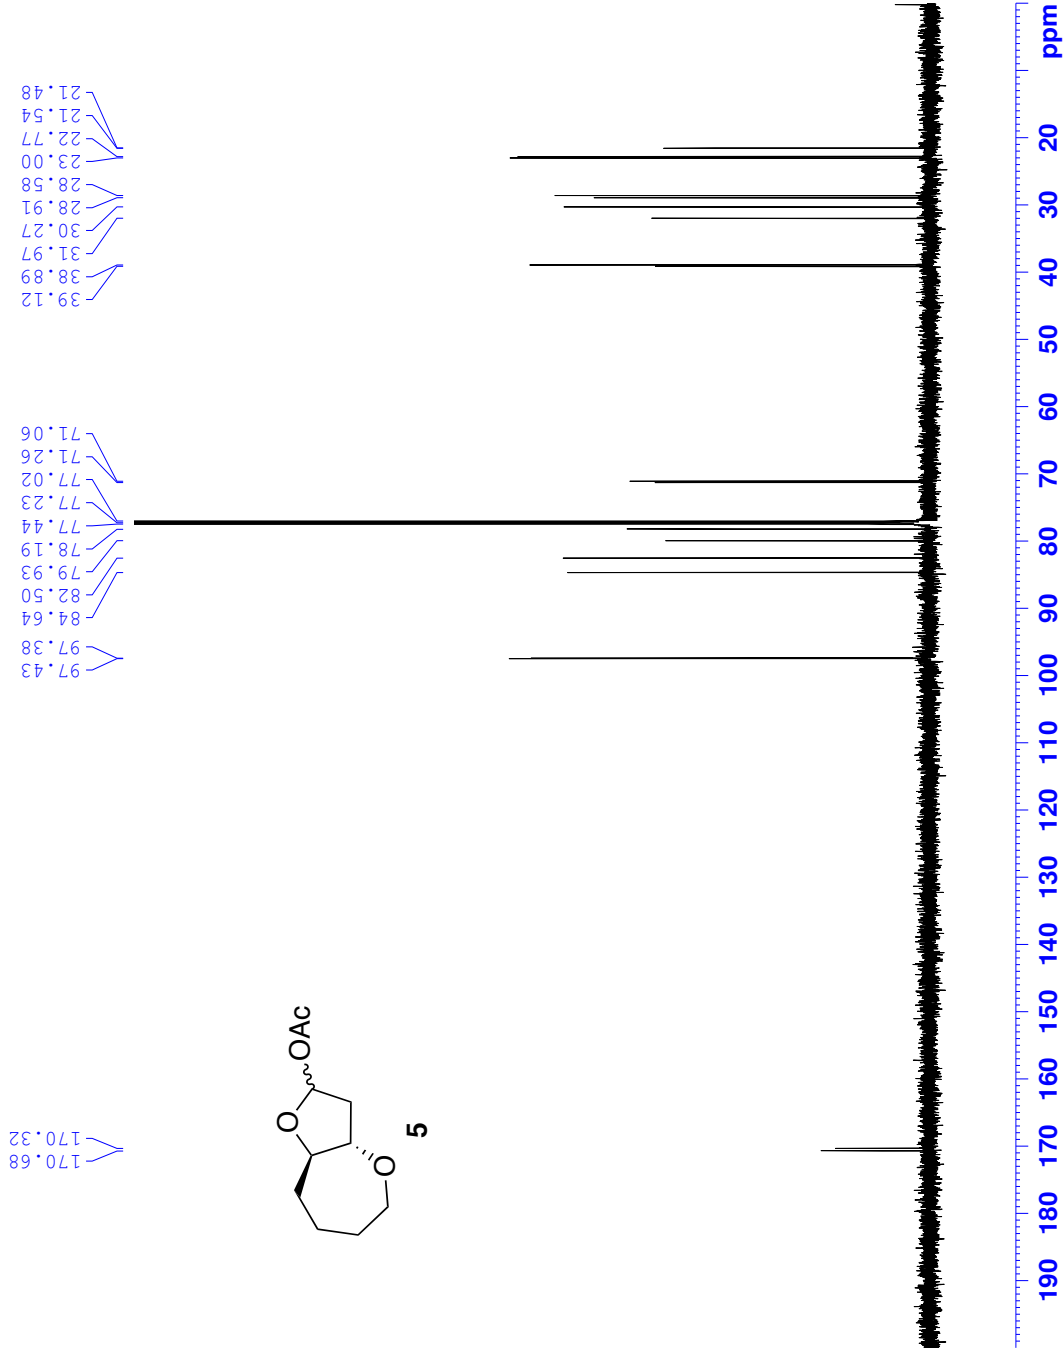

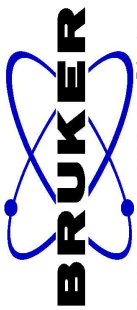

NAME VTT-IV-51-CR

EXPNO 2

PROCNO 1

Date\_ 20130122

Time 14.13

INSTRUM spect

PROBHD 5 mm BBO BB-1H

PULPROG zg30

TD 65536

SOLVENT CDCl3

NS 8

DS 0

SWH 10330.578 Hz

FIDRES 0.157632 Hz

AQ 3.1720407 sec

RG 256

DW 48.400 usec

DE 6.50 usec

TE 298.2 K

D1 2.00000000 sec

TD0 1

==== CHANNEL f1 =====

NUC1 1H

P1 9.20 usec

PL1 -3.00 dB

PL1W 37.58904266 W

SFO1 500.2020889 MHz

SI 32768

SF 500.1990137 MHz

WDW EM

SSB 0

LB 0.30 Hz

GB 0

PC 1.00

1.08  
1.07  
1.06  
1.04  
1.02  
1.00

4.57  
4.57

5.66  
5.65  
5.65

7.26

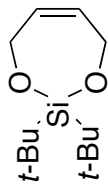

14

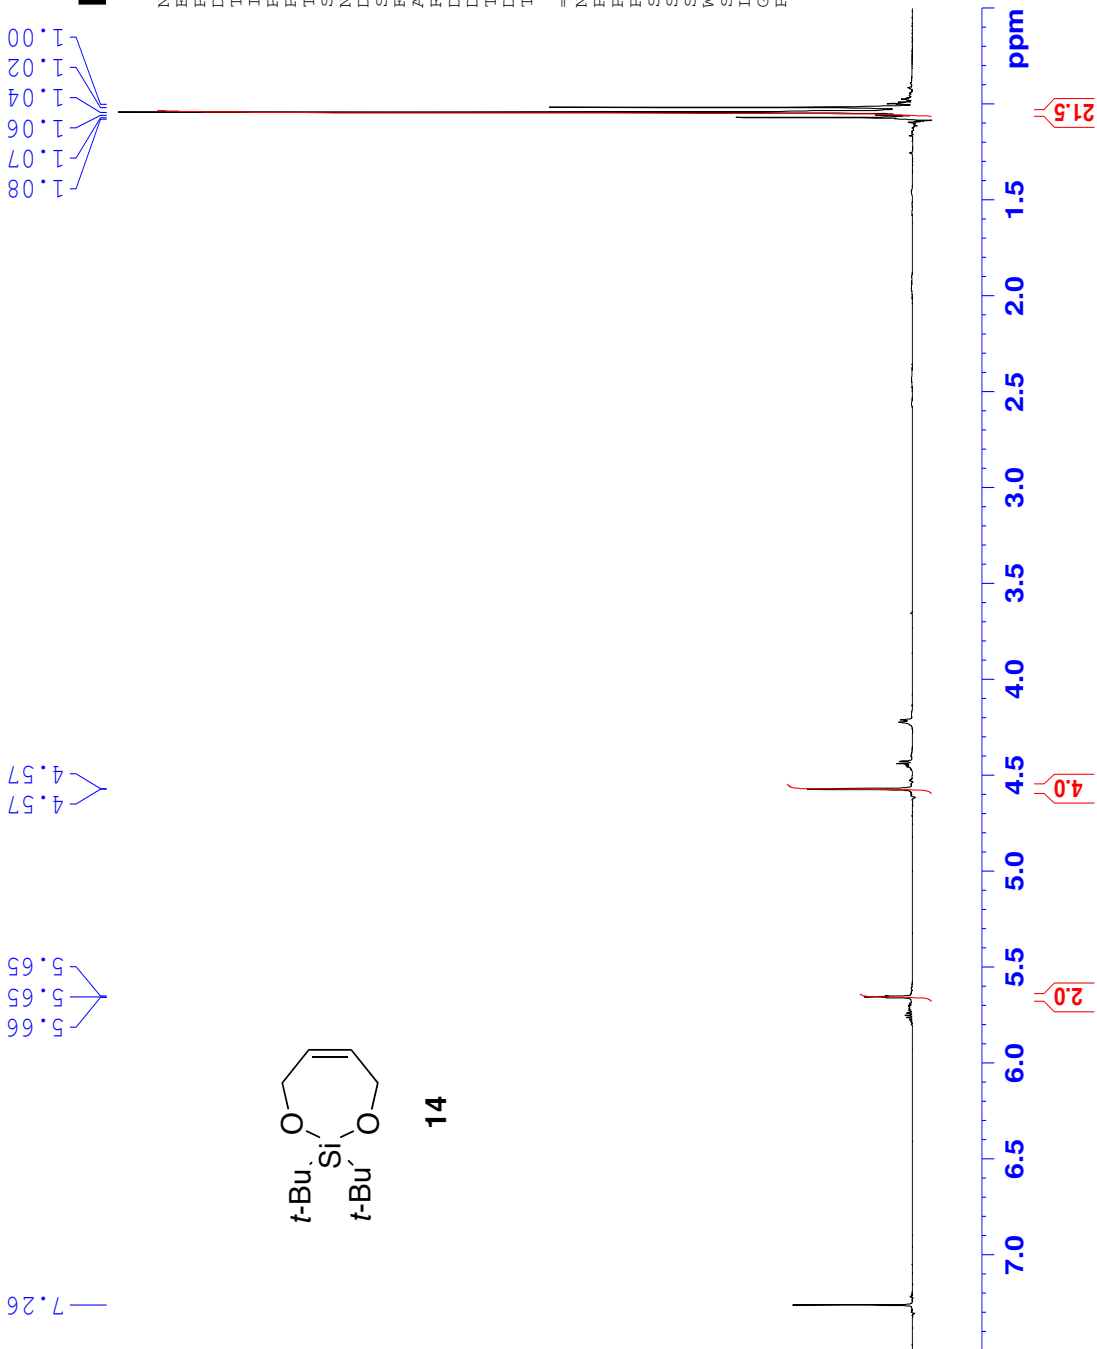

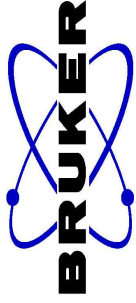

NAME VTT-IV-51-CR  
EXPNO 3  
PROCNO 1  
Date\_ 20130122  
Time\_ 14.15  
INSTRUM Spect  
PROBHD 5 mm BBO BB-IH  
PULPROG zgpg30  
TD 65536  
SOLVENT CDC13  
NS 128  
DS 0  
SWH 30030.029 Hz  
FIDRES 0.458222 Hz  
AQ 1.0912410 sec  
RG 32.768  
DW 16.650 usec  
DE 6.50 usec  
TE 298.6 K  
D1 2.00000000 sec  
D11 0.03000000 sec  
TD0 1

==== CHANNEL f1 =====  
NUC1 13C  
P1 9.75 usec  
PL1 2.00 dB  
PL1W 49.29017639 W  
SFO1 125.7877161 MHz

==== CHANNEL f2 =====  
CPDPRG2 waltz16  
NUC2 1H  
PCPD2 70.00 usec  
PL2 -3.00 dB  
PLI2 13.50 dB  
PLI3 13.50 dB  
PL2W 37.58904266 W  
PLI2W 0.84151381 W  
PLI3W 0.84151381 W  
SFO2 500.2010008 MHz  
SI 32.768  
SF 125.7751120 MHz  
WDW EM  
SSB 0  
LB 1.00 Hz  
GB 0  
PC 1.40

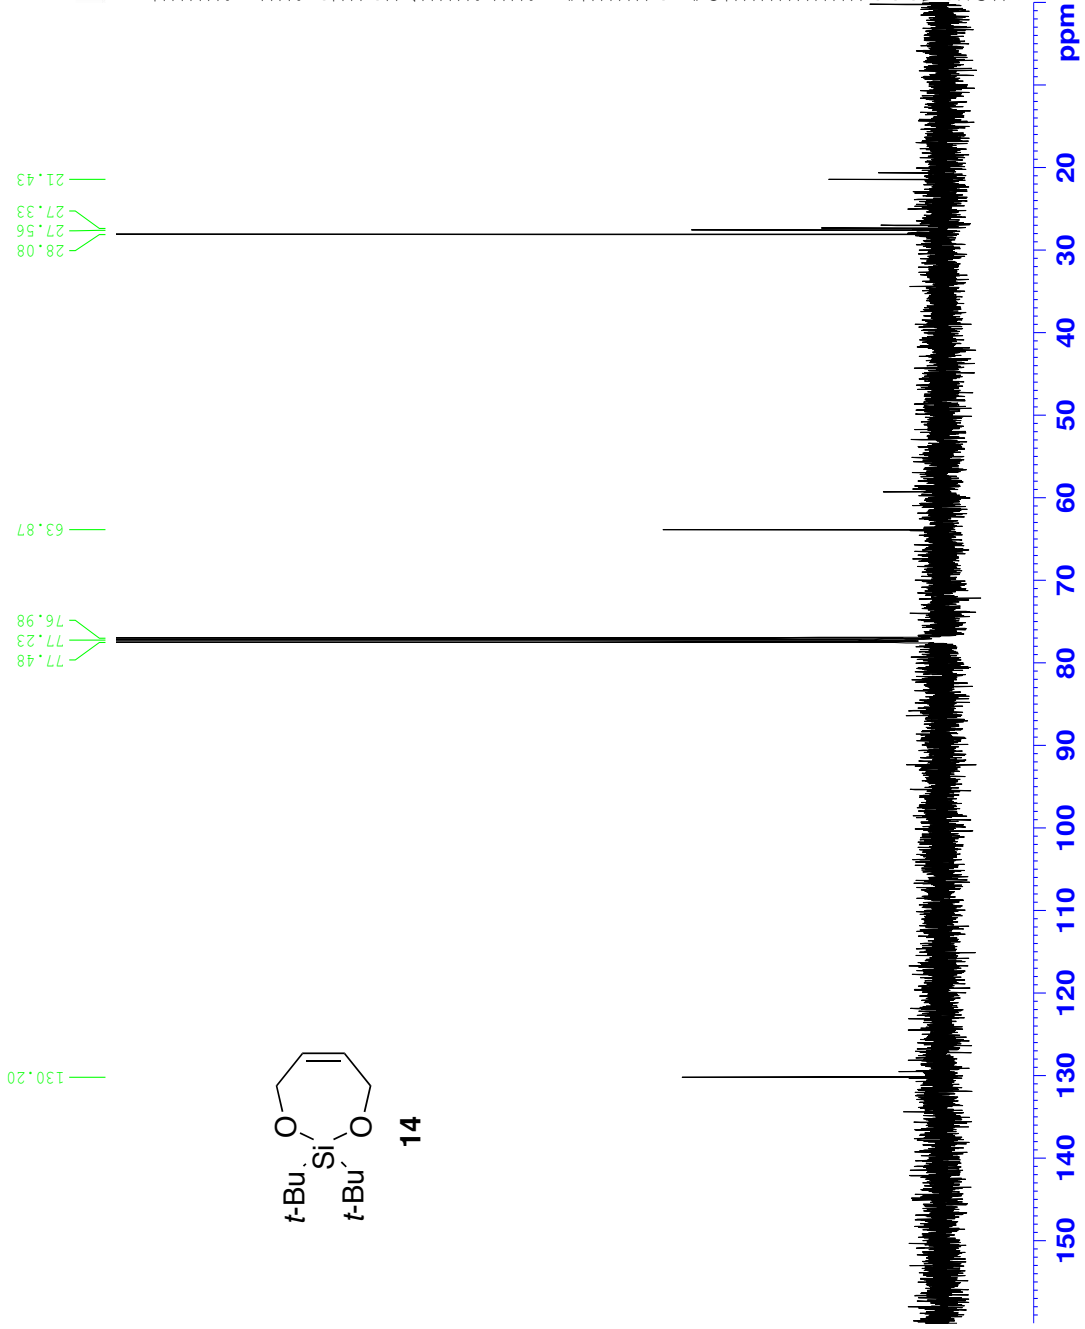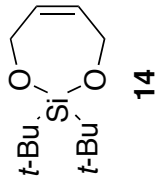

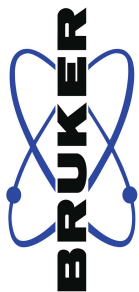

Current Data Parameters  
NAME VIT-IV-53-CR2  
EXPNO 1  
PROCNO 1

F2 - Acquisition Parameters  
Date\_ 20130124  
Time\_ 15.10  
INSTRUM spect  
PROBHD 5 mm PAQXI IH/  
PULPROG zg30  
TD 65536  
SOLVENT CDCl3  
NS 8  
DS 0  
SWH 12335.526 Hz  
FIDRES 0.188225 Hz  
AQ 2.6564426 sec  
RG 126.35  
DW 40.533 usec  
DE 6.50 usec  
TE 298.2 K  
D1 2.0000000 sec  
TDO 1

==== CHANNEL f1 =====  
NUC1 1H  
P1 9.79 usec  
PL1 9.30000019 W  
SFO1 600.1937064 MHz

F2 - Processing parameters  
SI 65536  
SF 600.1900130 MHz  
WDW EM  
SSB 0  
LB 0.30 Hz  
GB 0  
PC 1.00

1.09  
1.07  
1.08  
1.06  
1.05  
1.04  
1.03  
1.02

4.47  
4.46  
4.44  
4.44  
4.44  
4.44  
4.09  
4.08  
4.08  
4.08  
4.07  
4.06  
4.06  
3.30  
3.29  
3.28  
3.26  
3.25

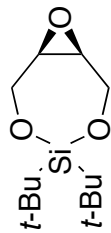

15

7.26

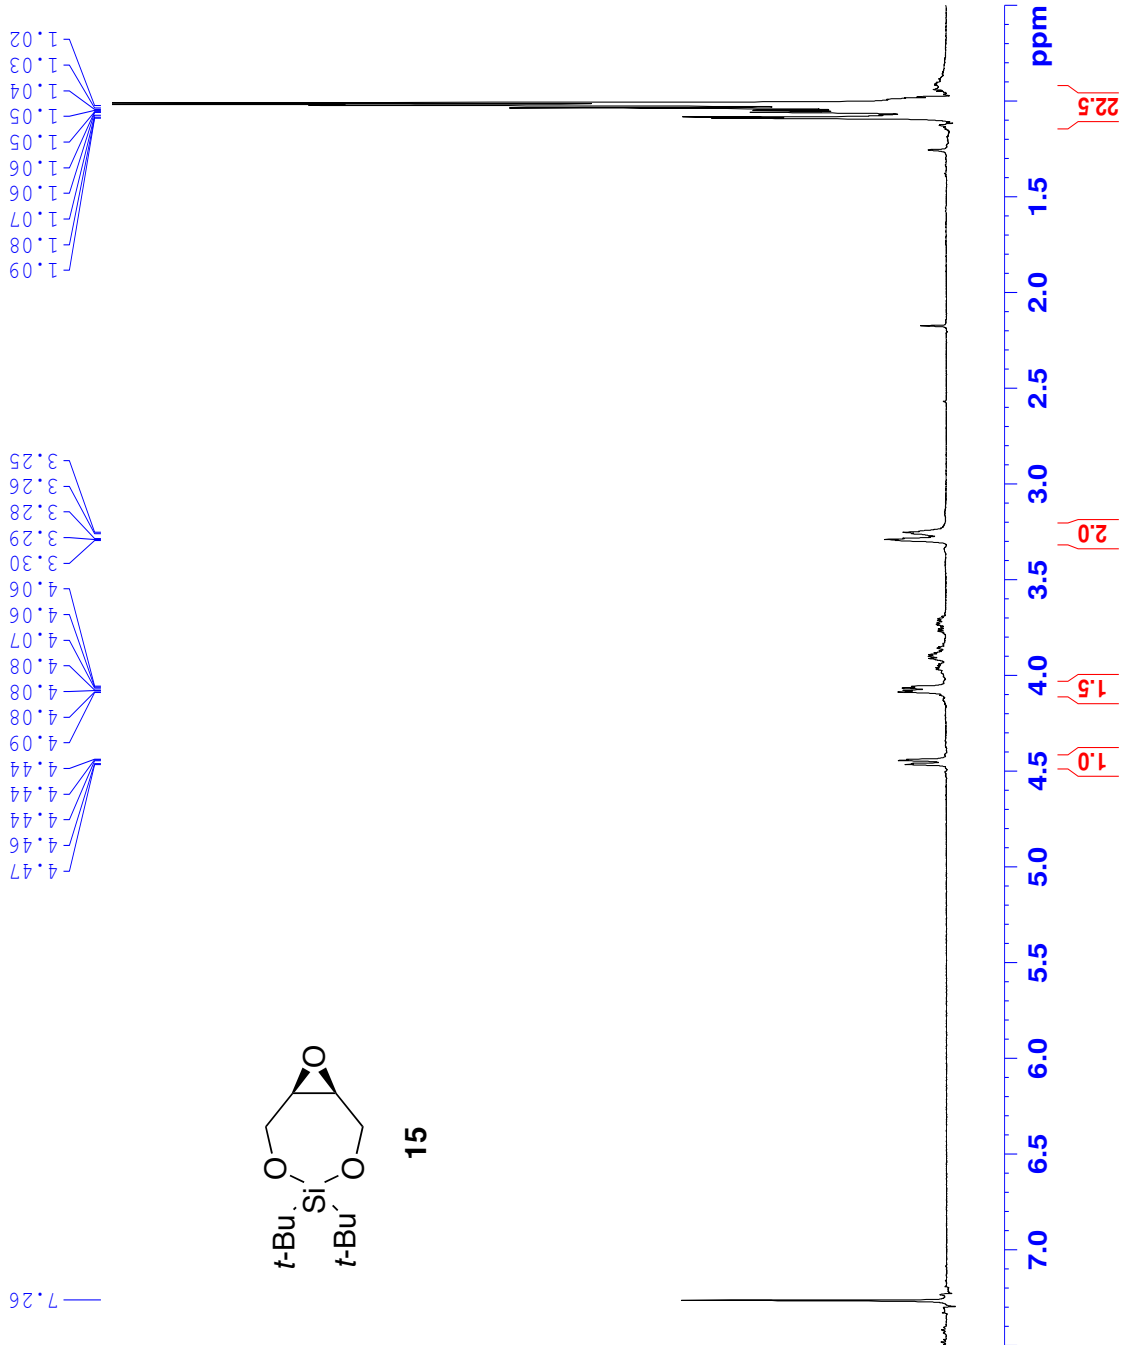

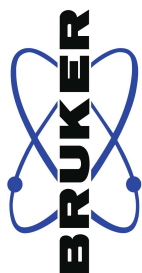

Current Data Parameters  
NAME VIT-IV-53-CR2  
EXPNO 2  
PROCNO 1

F2 - Acquisition Parameters  
Date\_ 20190124  
Time 13.12  
INSTRUM spect  
PROBHD 5 mm PAXX-1H  
PULPROG zgpg30  
TD 65536  
SOLVENT CDCl3  
NS 128  
DS 0  
SWH 36057.691 Hz  
FIDRES 0.550197 Hz  
AQ 0.9088159 sec  
RG 184.65  
DW 13.867 usec  
DE 6.50 usec  
TE 298.2 K  
D1 2.5000000 sec  
D11 0.0300000 sec  
TD0 1

==== CHANNEL f1 =====  
NUC1 13C  
P1 15.00 usec  
PLW1 106.0000000 W  
SFO1 150.9329866 MHz

==== CHANNEL f2 =====  
CPDPRG2 waitz16  
NUC2 1H  
PCPDZ 70.00 usec  
PLW2 9.30000019 W  
PLWI2 0.16190999 W  
PLWI3 0.00913500 W  
SFO2 600.1924008 MHz

F2 - Processing parameters  
SI 52768  
SF 150.9178633 MHz  
WDW EM  
SSB 0  
LB 1.00 Hz  
GB 0  
PC 1.40

27.80  
27.66  
27.50  
27.47  
27.31

56.13  
60.50  
64.11

77.44  
77.23  
77.02

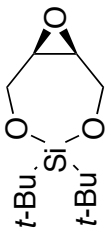

15

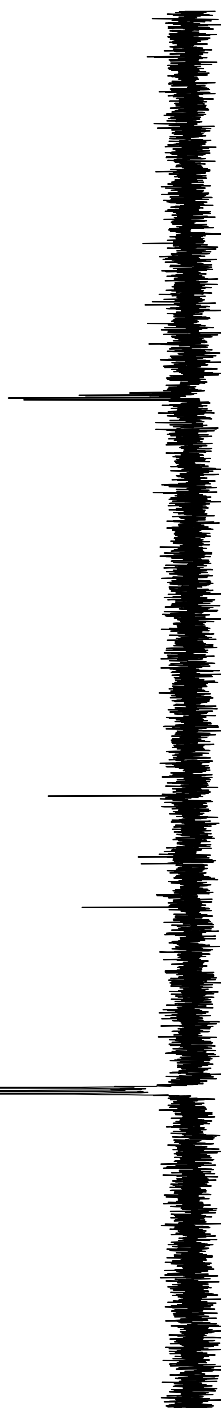

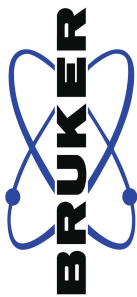

Current Data Parameters  
NAME VTI-II-135-C  
EXPNO 2  
PROCNO 1

F2 - Acquisition Parameters  
Date\_ 20110822  
Time 14.15  
INSTRUM spect  
PROBHD 5 mm BBO BB-1H  
PULPROG zg30  
ID 65536  
SOLVENT CDCl3  
NS 16  
DS 2  
SWH 10330.578 Hz  
FIDRES 0.157632 Hz  
AQ 3.1719923 sec  
RG 256  
DW 48.400 usec  
DE 6.50 usec  
TE 298.2 K  
D1 2.0000000 sec  
TD0 1

==== CHANNEL f1 =====  
NUC1 1H  
P1 9.20 usec  
PL1 -3.00 dB  
PL1W 37.58904266 W  
SFO1 500.2020889 MHz

F2 - Processing Parameters  
SI 32768  
SF 500.1990134 MHz  
WDW EM  
SSB 0  
LB 0  
GB 0  
PC 1.00

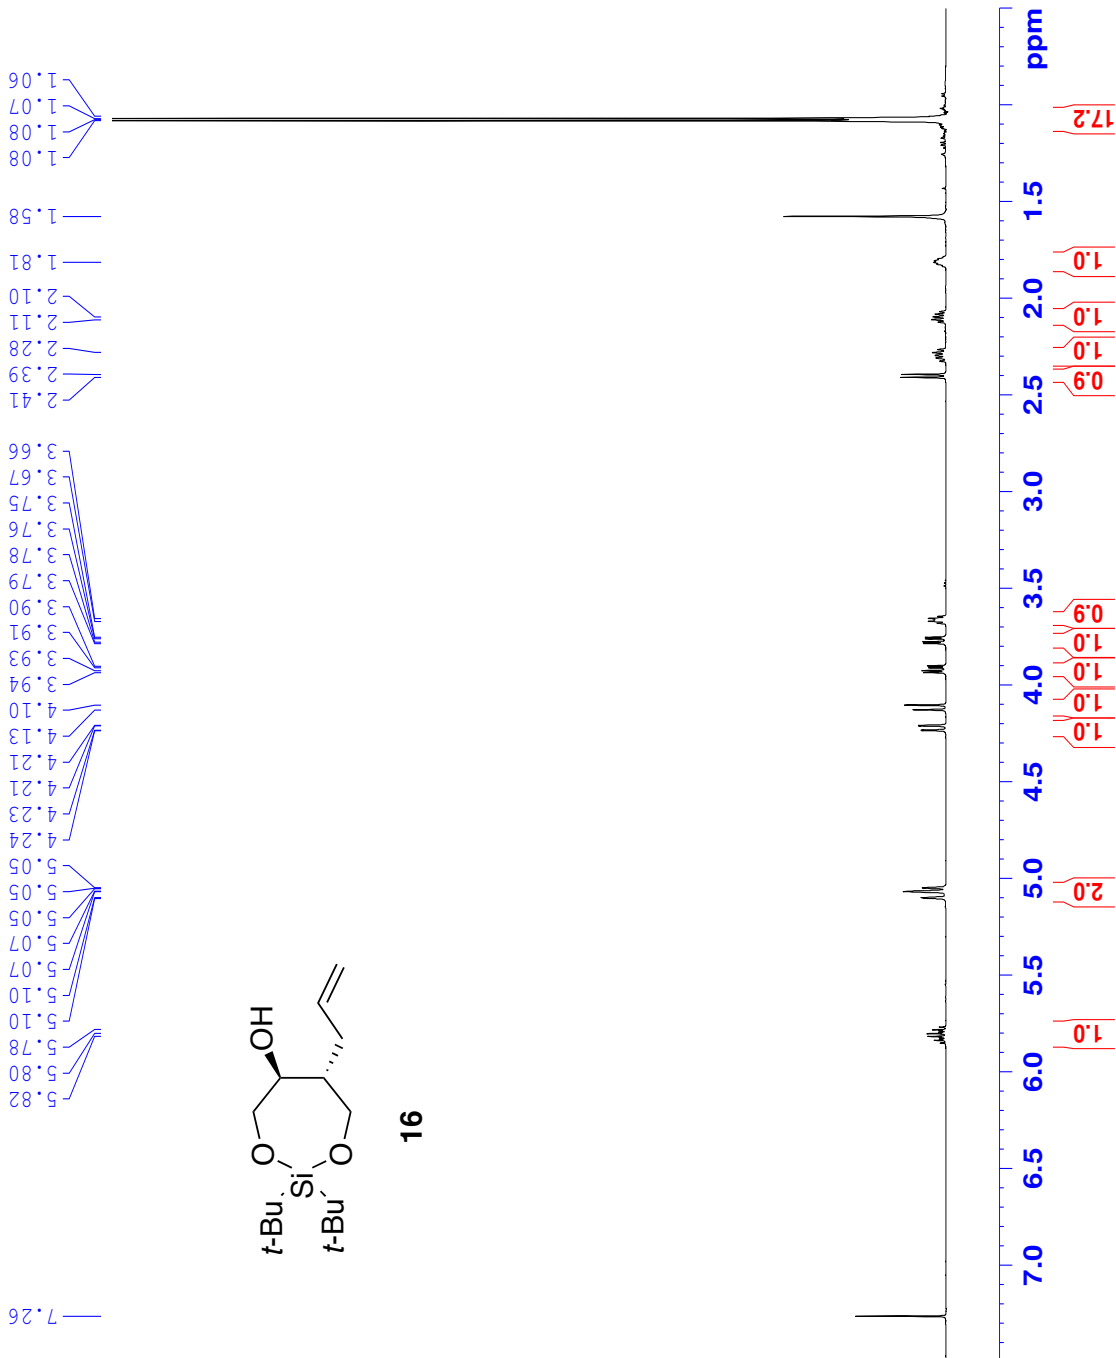

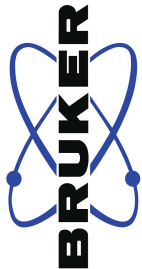

Current Data Parameters  
NAME VIT-II-135-C  
EXPNO 3  
PROCNO 1

F2 - Acquisition Parameters  
Date\_ 20110822  
Time 14.24  
INSTRUM spect  
PROBHD 5 mm BBO BB-IH  
PULPROG zgpg30  
ID 65536  
SOLVENT CDCl3  
NS 177  
DS 4  
SWH 30030.024 Hz  
FIDRES 0.758222 Hz  
AQ 1.091224 sec  
RG 16384  
DW 16.650 usec  
DE 6.50 usec  
TE 298.7 K  
D1 2.00000000 sec  
D11 0.03000000 sec  
TD0 1

==== CHANNEL f1 =====  
NUC1 13C  
P1 10.25 usec  
PL1 2.00 dB  
PL1W 49.29017639 W  
SFO1 125.7877161 MHz

==== CHANNEL f2 =====  
CPDPRG2 waltz16  
NUC2 1H  
PCPD2 70.00 usec  
PL2 -3.00 dB  
PL12 14.63 dB  
PL13 14.91 dB  
PL2W 37.58904266 W  
PL12W 0.64872593 W  
PL13W 0.60822082 W  
SFO2 500.2010008 MHz

F2 - Processing Parameters  
SF 32768  
WDW EM  
SSB 0  
LB 1.00 Hz  
GB 0  
PC 1.40

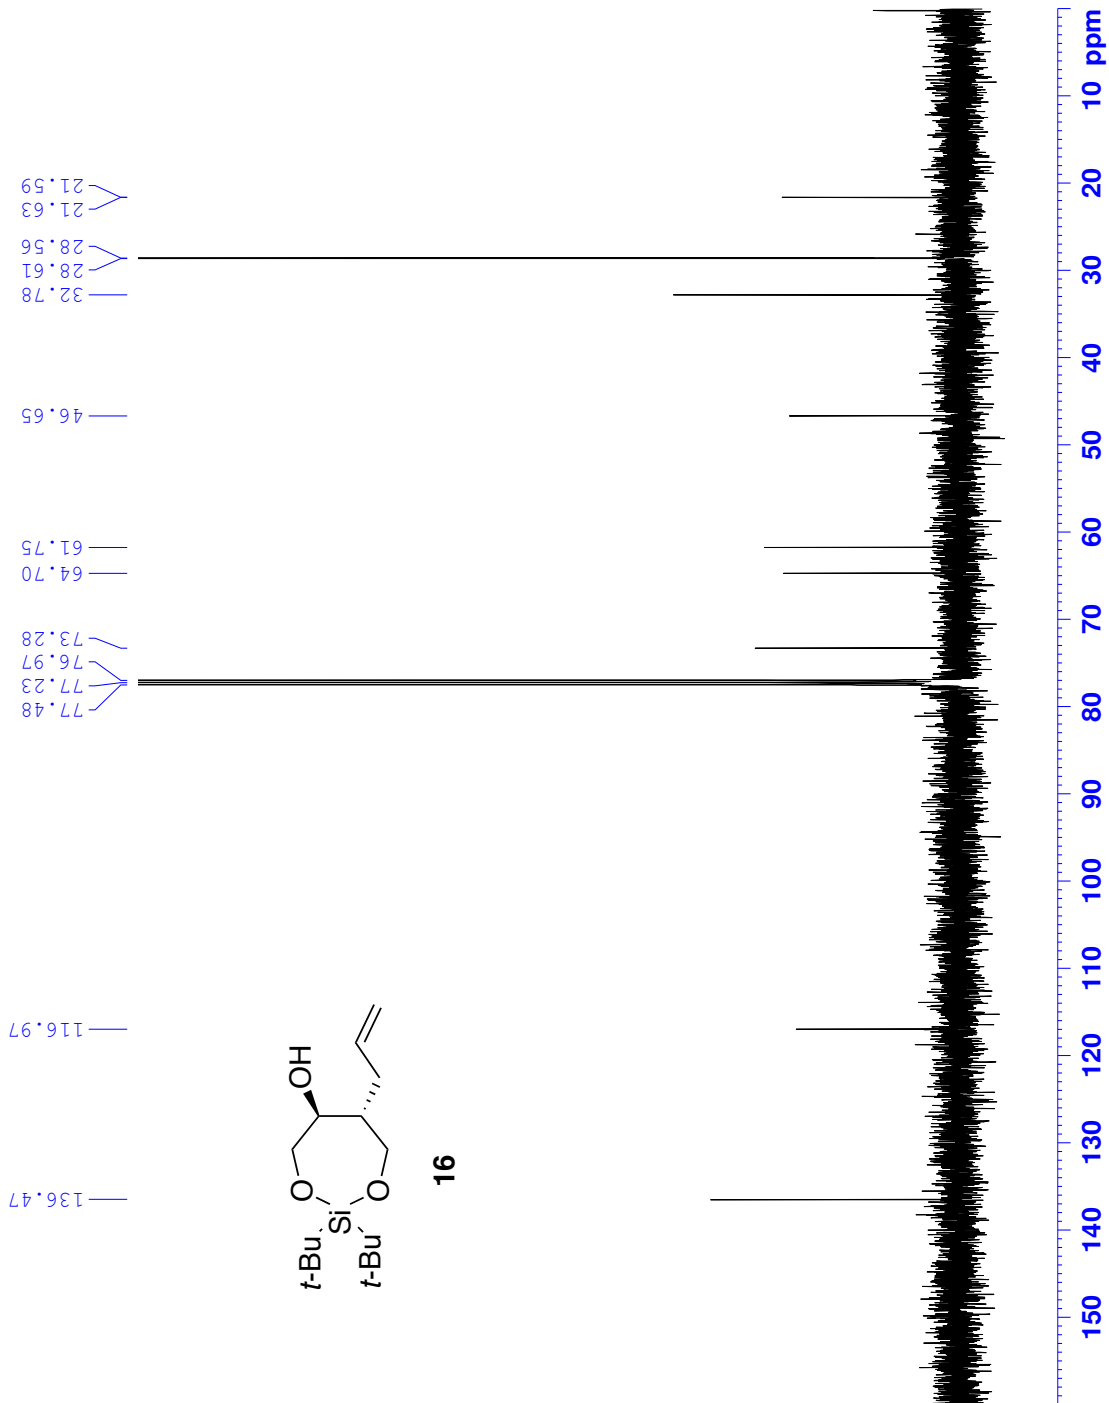

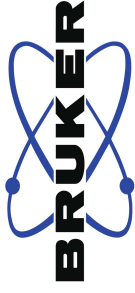

Current Data Parameters  
NAME VTT-II-140-A  
EXNO 2  
PROCNO 1

F2 - Acquisition Parameters  
Date\_ 20110907  
Time 13.38  
INSTRUM spect  
PROBHD 5 mm EBO BB-1H  
PULPROG zg30  
TD 65536  
SOLVENT CDCl3  
NS 1  
DS 2  
SWH 10330.578 Hz  
FIDRES 0.157632 Hz  
AQ 3.1719923 sec  
RG 90.5  
DW 48.400 usec  
DE 6.50 usec  
TE 298.2 K  
D1 2.0000000 sec  
TD0 1

==== CHANNEL f1 =====  
NUC1 1H  
P1 9.20 usec  
PL1 -3.00 dB  
PL1W 37.58904266 W  
SFO1 500.2020889 MHz

F2 - Processing parameters  
SI 32768  
SF 500.1990127 MHz  
WDW no  
SSB 0  
LB 0 Hz  
GB 0  
PC 1.00

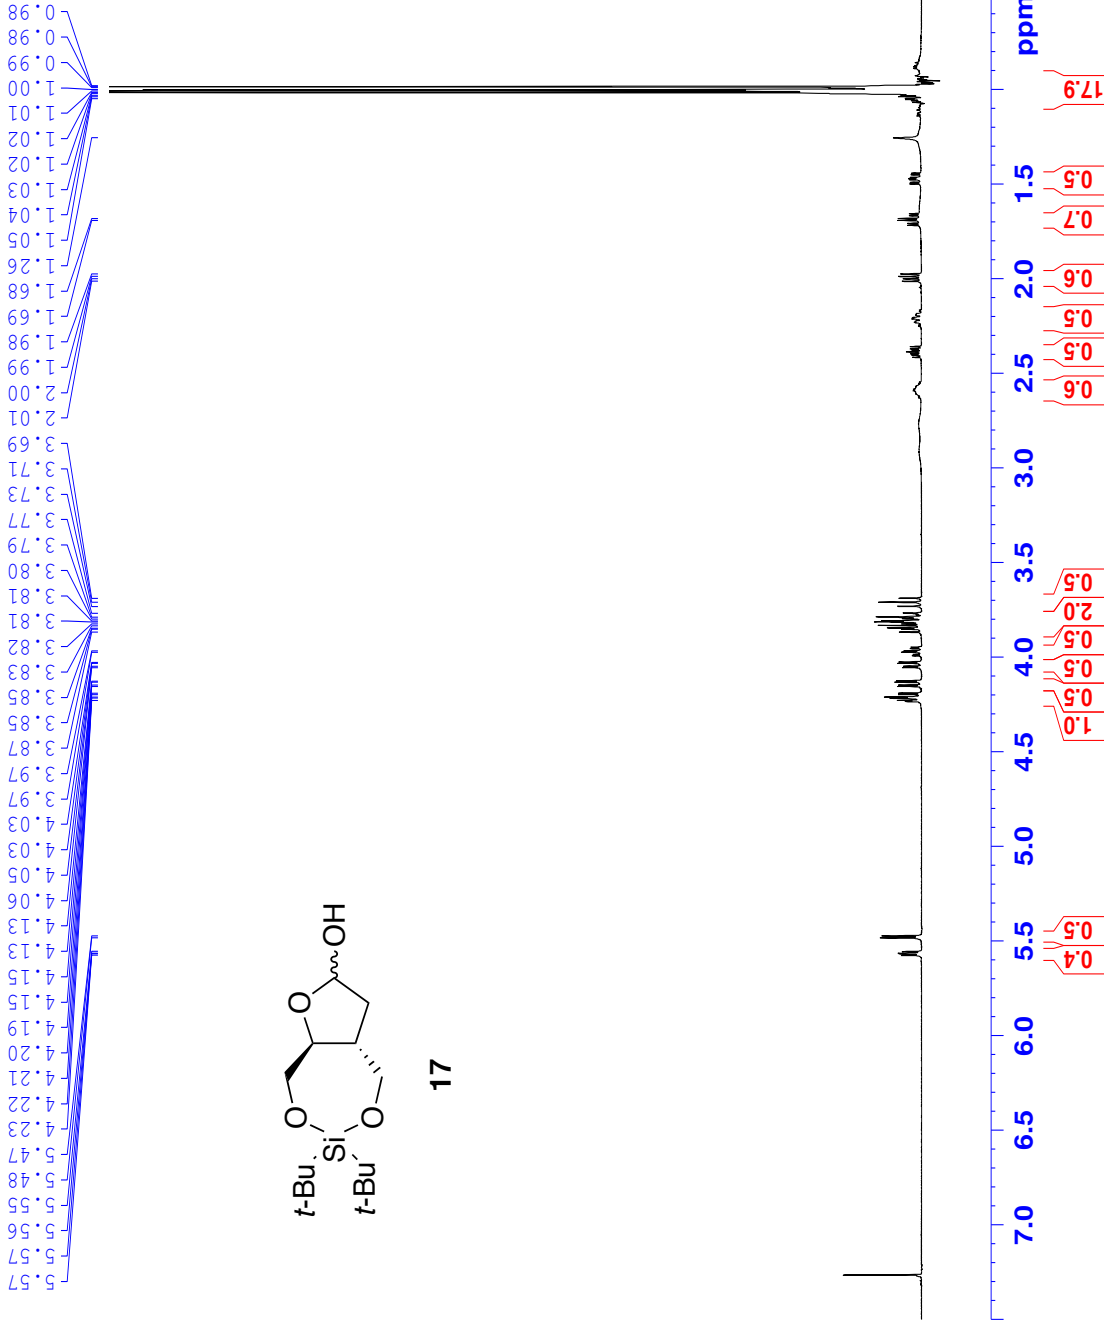



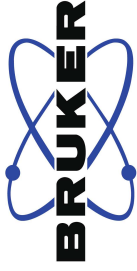

Current Data Parameters  
NAME VTT-II-140-A  
EXPNO 3  
PROCNO 1

F2 - Acquisition Parameters  
Date\_ 20110907  
Time 13.45  
INSTRUM spect  
PROBHD 5 mm BBO BB-IH  
PULPROG zgpg30  
ID 65536  
SOLVENT CDCl3  
DS 61  
SS 30030.029 Hz  
SFH 0.458222 Hz  
FIDRES 1.0912244 sec  
AQ 13004  
RG 16.650 usec  
DE 299.3 K  
TE 2.0000000 sec  
D1 0.0300000 sec  
D11 1  
TD0

==== CHANNEL f1 =====  
NUC1 13C  
P1 10.25 usec  
PL1 2.00 dB  
PL1W 49.29017639 W  
SFO1 125.7877161 MHz

==== CHANNEL f2 =====  
CFPRG2 waltz16  
NUC2 13C  
PCPD2 70.00 usec  
PL2 -3.00 dB  
PL12 14.63 dB  
PL13 14.91 dB  
PL12W 37.58904266 W  
PL13W 0.64872593 W  
SFO2 500.2010008 MHz

F2 - Processing parameters  
SI 32768  
SF 125.7751116 MHz  
WDW EM  
SSB 0  
LB 1.00 Hz  
GB 0  
PC 1.40

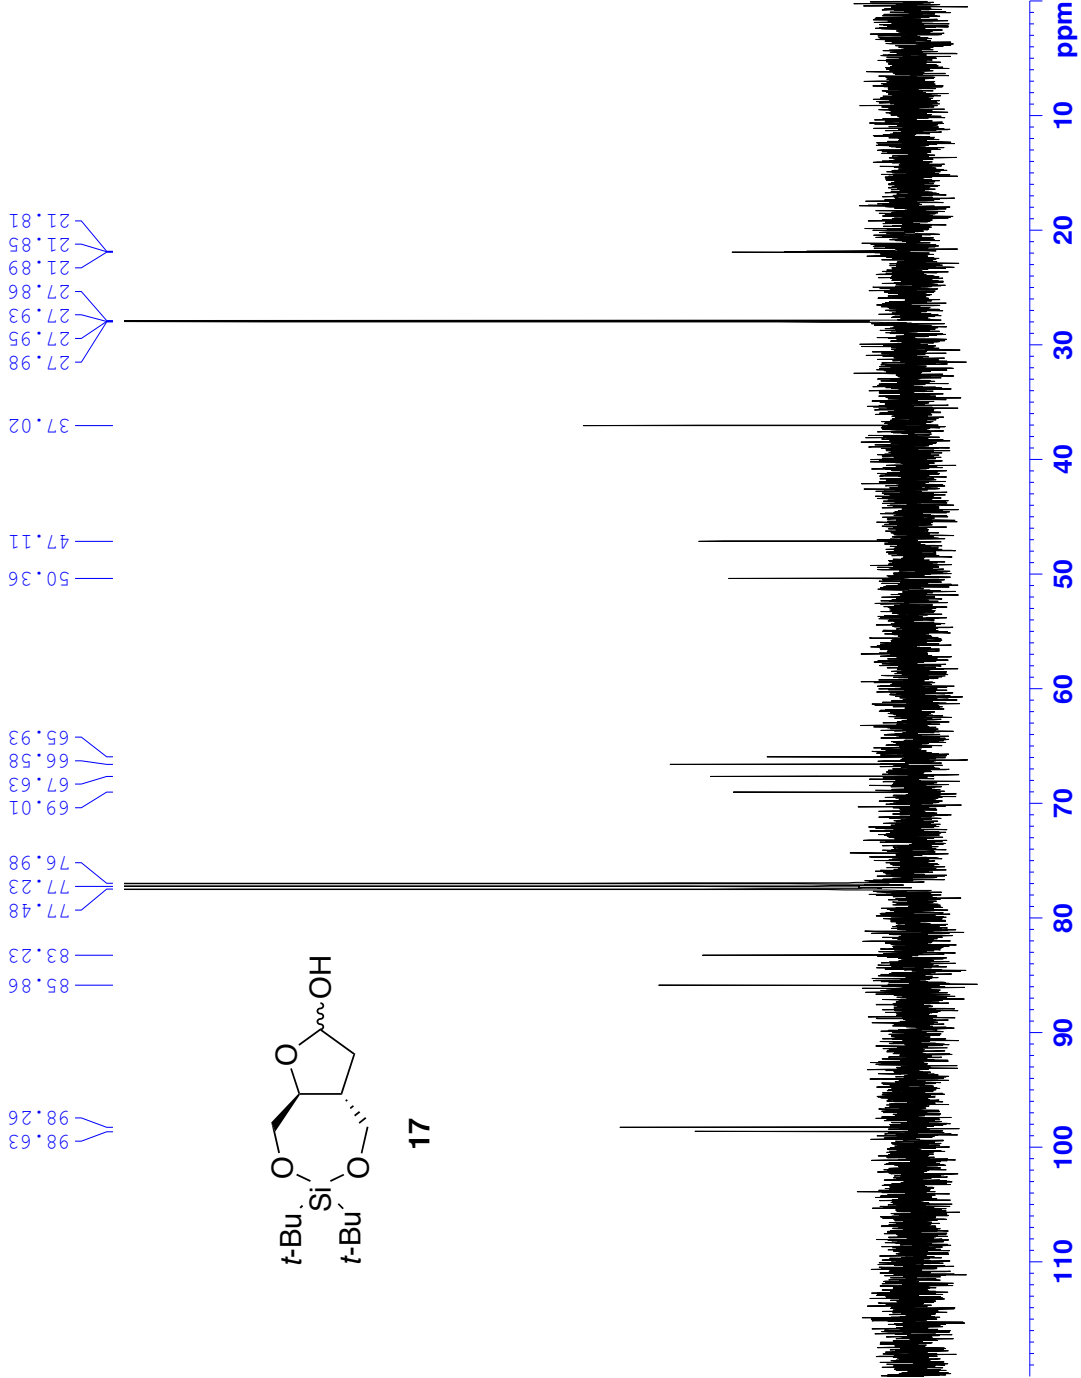

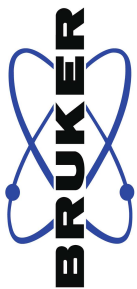

Current Data Parameters  
NAME VTI-II-145-A  
EXPNO 2  
PROCNO 1

F2 - Acquisition Parameters  
Date\_ 20110912  
Time 12.53  
INSTRUM spect  
PROBHD 5 mm BBO BB-1H  
PULPROG zg30  
TD 65536  
SOLVENT CDC13  
NS 16  
DS 2  
SWH 10330.578 Hz  
FIDRES 0.157632 Hz  
AQ 3.1719923 sec  
RG 64  
DW 48.400 usec  
DE 6.50 usec  
TE 298.1 K  
D1 2.00000000 sec  
TD0 1

==== CHANNEL f1 =====  
NUC1 1H  
P1 9.20 usec  
PL1 -3.00 dB  
PL1W 37.58904266 W  
SF01 500.2020889 MHz

F2 - Processing parameters  
SI 32768  
SF 500.1990100 MHz  
WDW no  
SSB 0 Hz  
LB 0  
GB 0  
PC 1.00

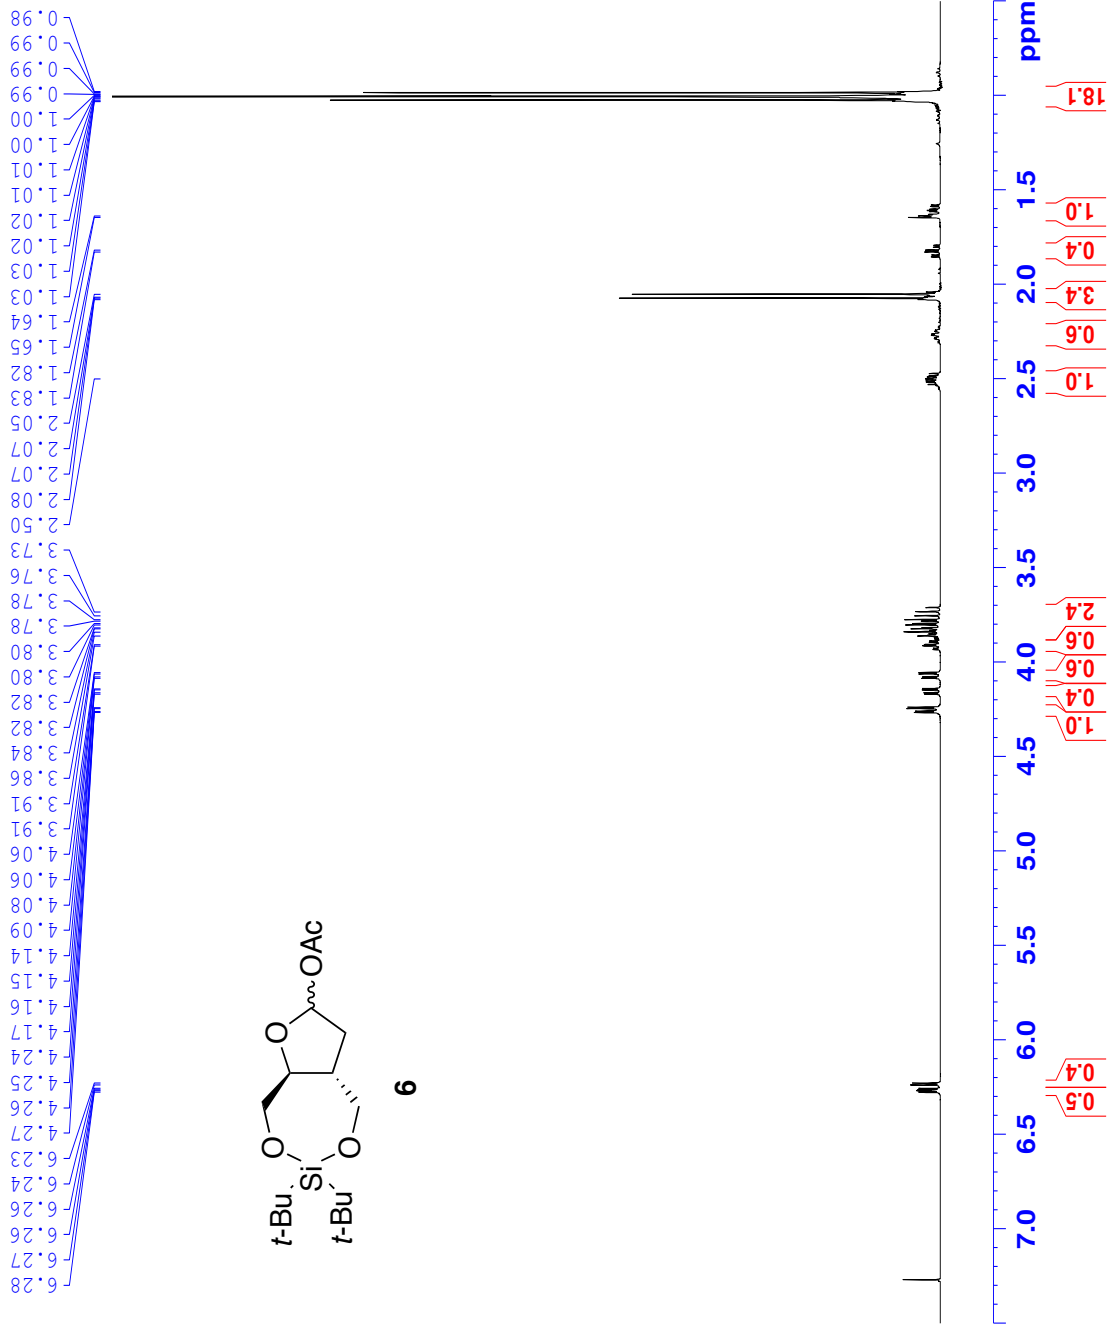

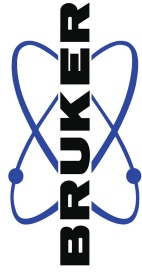

Current Data Parameters  
NAME VII-II-145-A  
EXPNO 3  
PROCNO 1

F2 - Acquisition Parameters  
Date\_ 20110912  
Time 12.56  
INSTRUM spect  
PROBHD 5 mm BBO BB-1H  
PULPROG zgpg30  
TD 65536  
SOLVENT CDCl3  
NS 513  
DS 4  
SWH 30030.029 Hz  
FIDRES 0.458222 Hz  
AQ 1.0912244 sec  
RG 5160.6  
DW 16.650 usec  
DE 6.50 usec  
TE 298.4 K  
D1 2.00000000 sec  
D11 0.03000000 sec  
TD0 1

==== CHANNEL f1 =====  
NUC1 13C  
P1 10.25 usec  
PL1 2.00 dB  
PL1W 49.29017639 W  
SFO1 125.7877161 MHz

==== CHANNEL f2 =====  
CFPRG2 waltz16  
NUC2 1H  
PCPD2 70.00 usec  
PL2 3.00 dB  
PL12 14.63 dB  
PL13 14.91 dB  
PL2W 37.58904266 W  
PL12W 0.64872593 W  
PL13W 0.60822082 W  
SFO2 500.2010008 MHz

F2 - Processing parameters  
SI 32768  
SF 125.7751143 MHz  
WDW EM  
SSB 0  
LB 1.00 Hz  
GB 0  
PC 1.40

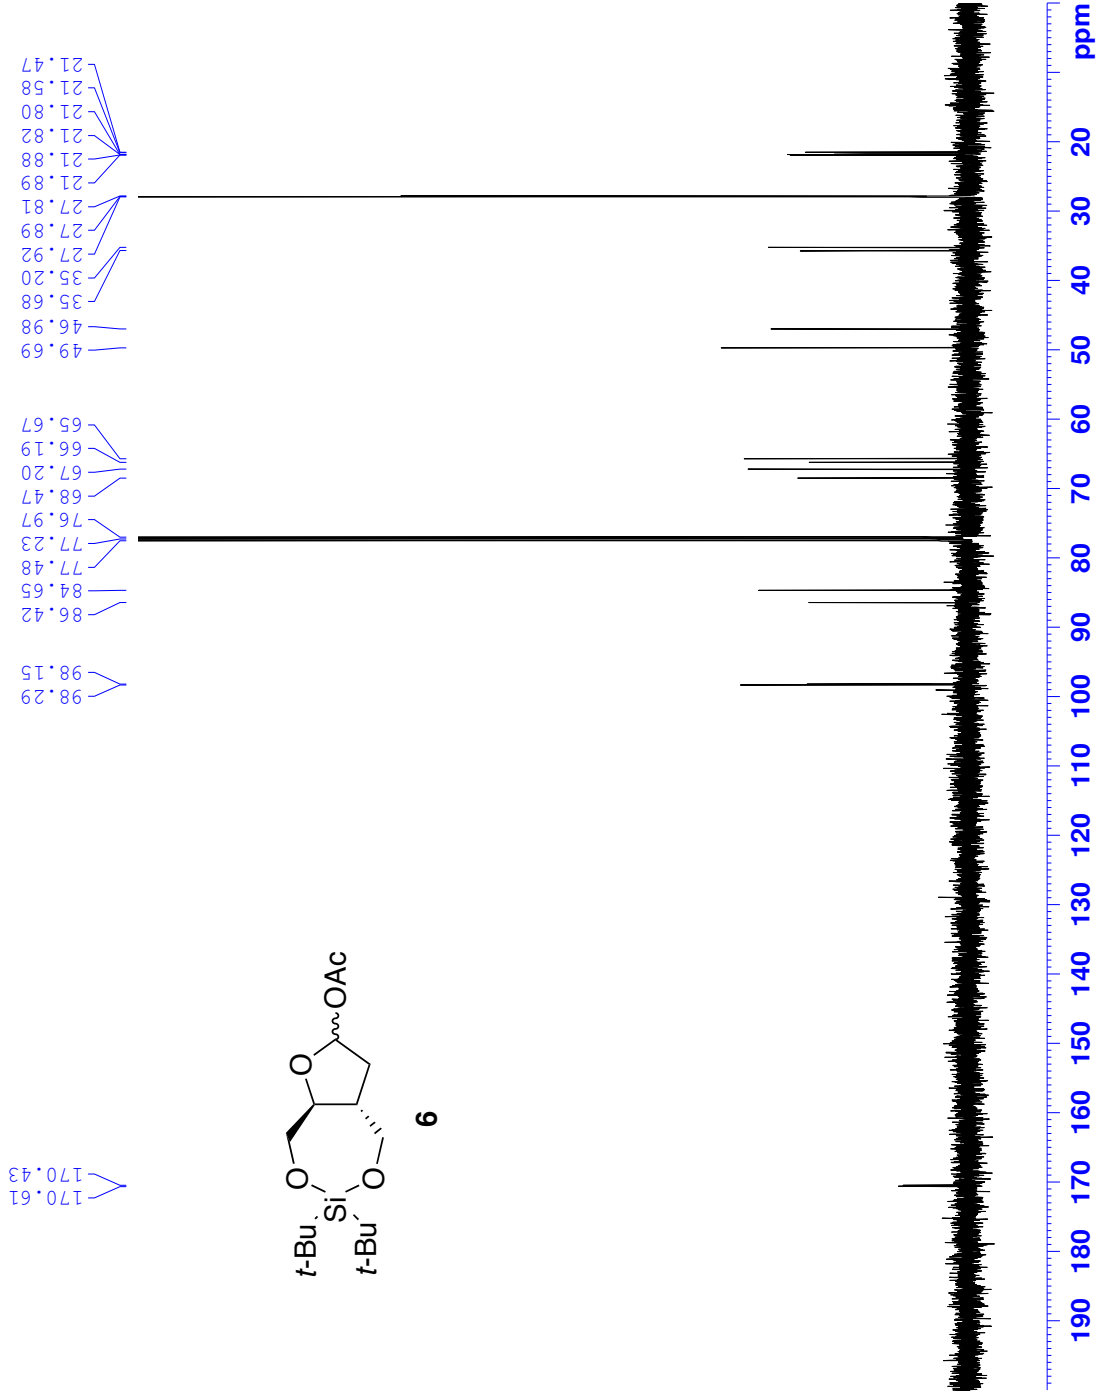

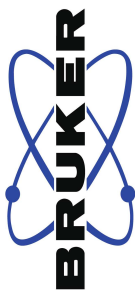

Current Data Parameters  
NAME VIT-IV-2-B  
EXPNO 1  
PROCNO 1  
F2 - Acquisition Parameters  
Date\_ 20120912  
Time 14.34  
INSTRUM spect  
PROBHD 5 mm PABBO BB/  
PULPROG zg30  
TD 65536  
SOLVENT CDCl3  
NS 8  
DS 0  
SWH 12335.526 Hz  
FIDRES 0.188225 Hz  
AQ 2.6564426 sec  
RG 56.41  
DW 40.533 usec  
DE 6.50 usec  
TE 298.2 K  
D1 2.0000000 sec  
TD0 1  
===== CHANNEL f1 =====  
NUC1 1H  
P1 11.00 usec  
PLW1 26.5000000 W  
SF01 600.1937064 MHz  
F2 - Processing parameters  
SI 65536  
SF 600.1900112 MHz  
WDW EM  
SSB 0  
LB 0  
GB 0  
PC 1.00

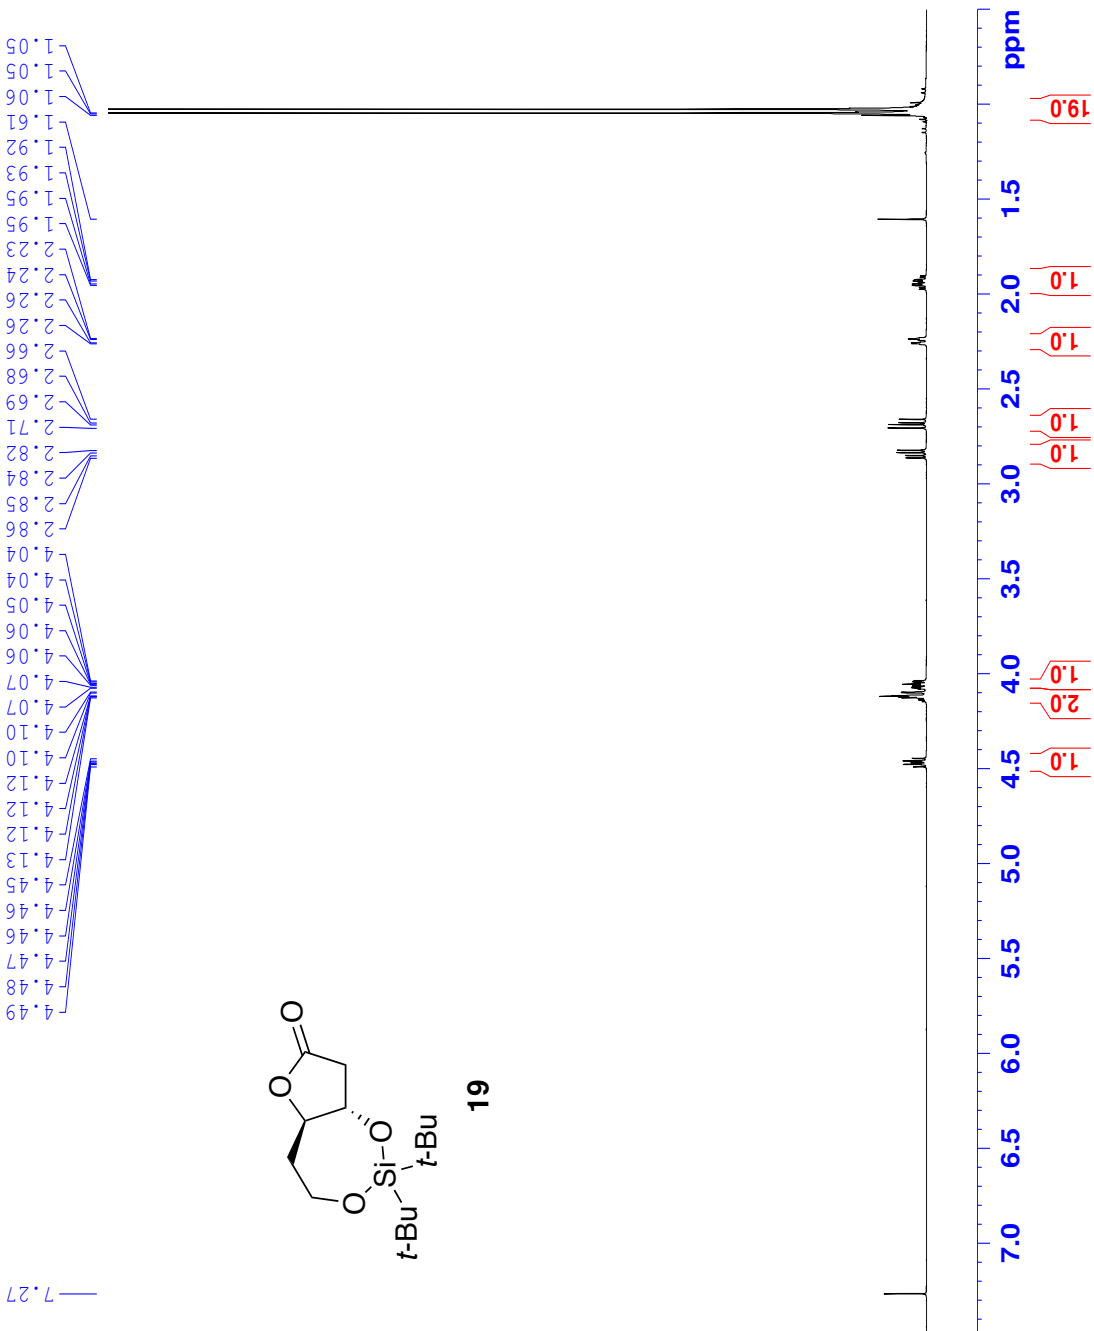

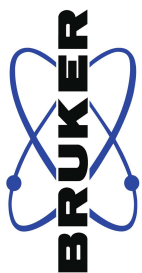

Current Data Parameters  
NAME VIT-IV-2-B  
EXPNO 2  
PROCNO 1

F2 - Acquisition Parameters  
Date\_ 20120912  
Time 15.12  
INSTRUM spect  
PROBHD 5 mm PABBO BB/  
PULPROG zgpg30  
AQ 653.6  
SOLVENT CDCl3  
NS 128  
DS 0  
SWH 36057.691 Hz  
FIDRES 0.550197 Hz  
AQ 0.9088159 sec  
RG 184.65  
DW 13.867 usec  
DE 13.867 usec  
TE 298.3 K  
D1 2.50000000 sec  
D11 0.03000000 sec  
TD0 1

===== CHANNEL f1 =====  
NUC1 13C  
P1 10.65 usec  
PLW1 104.0000000 W  
SFO1 150.9329866 MHz

===== CHANNEL f2 =====  
CPDPRG2 waltz16  
NUC2 1H  
PCPDZ 70.00 usec  
PLW2 26.50000000 W  
PLW12 0.65426996 W  
PLW13 0.32706000 W  
SFO2 600.1924008 MHz

F2 - Processing parameters  
SI 32768  
SF 150.9178655 MHz  
WDW EM  
SSB 0  
LB 1.00 Hz  
GB 0  
PC 1.40

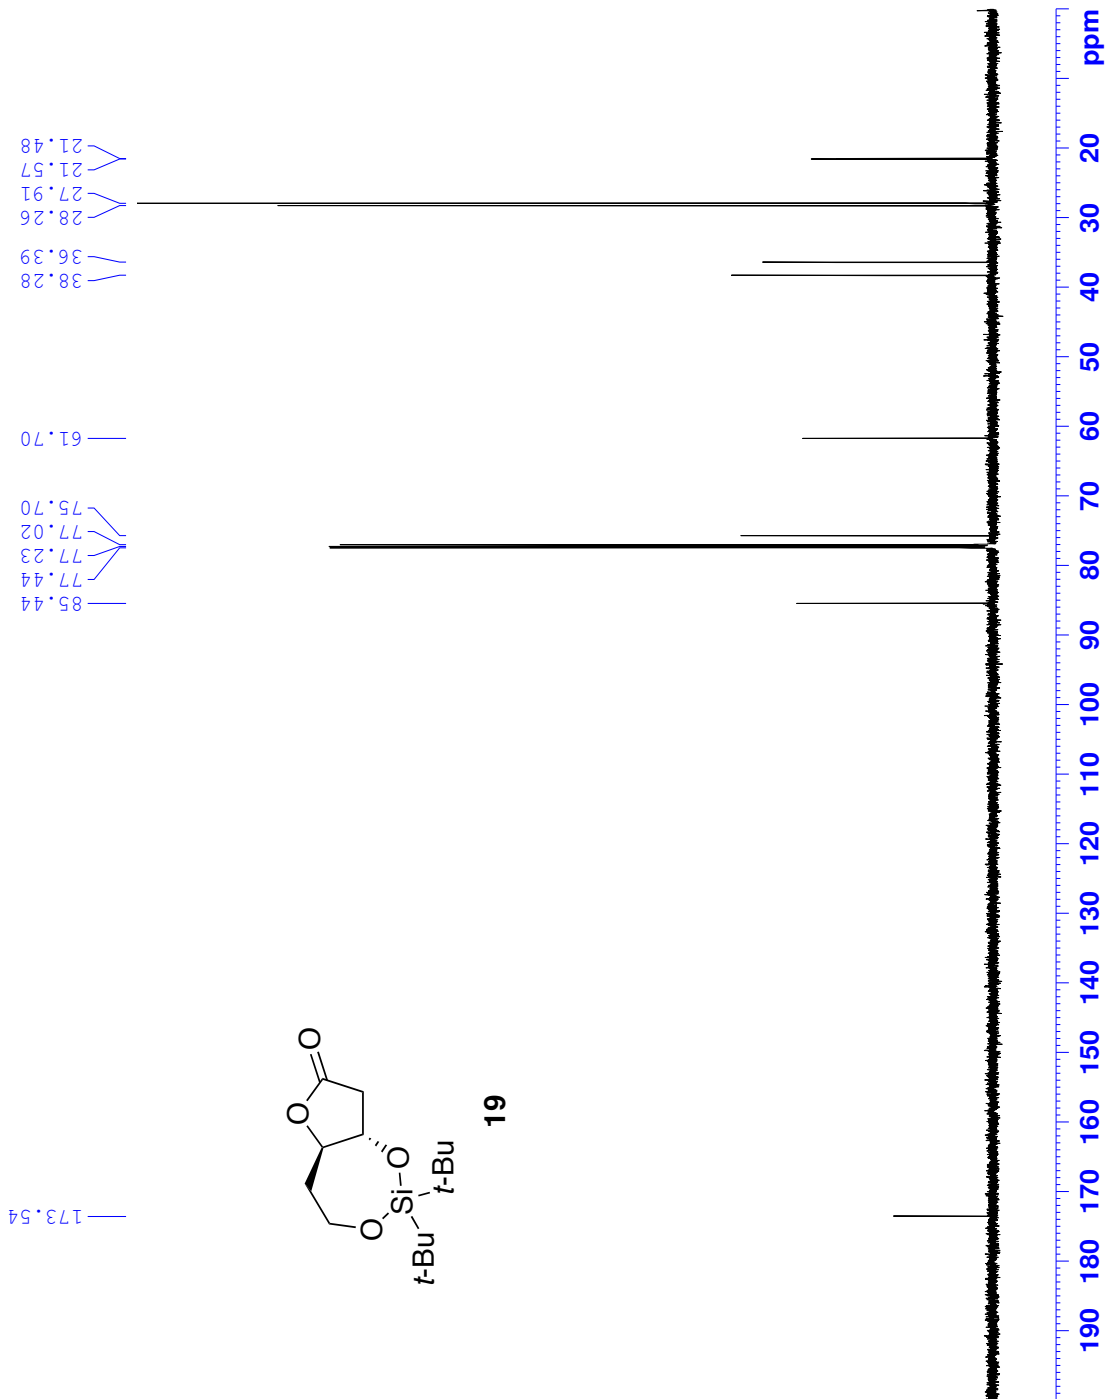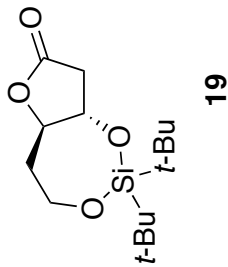

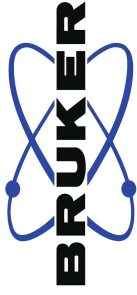

Current Data Parameters  
NAME VIT-IV-16-A  
EXPNO 5  
PROCNO 1

F2 - Acquisition Parameters  
Date\_ 20120917  
Time 16.41  
INSTRUM spect  
PROBHD 5 mm PABBO BB/  
PULPROG zg30  
TD 65536  
SOLVENT C6D6  
NS 8  
DS 0  
SWH 12335.526 Hz  
FIDRES 0.188225 Hz  
AQ 2.6564426 sec  
RG 56.41  
DW 40.533 usec  
DE 6.50 usec  
TE 298.2 K  
D1 2.0000000 sec  
TDO 1

===== CHANNEL f1 =====  
NUC1 1H  
P1 11.00 usec  
PLW1 26.5000000 W  
SFO1 600.1937064 MHz

F2 - Processing parameters  
SI 65536  
SF 600.1899953 MHz  
WDW EM  
SSE 0  
LB 0.30 Hz  
GB 0  
PC 1.00

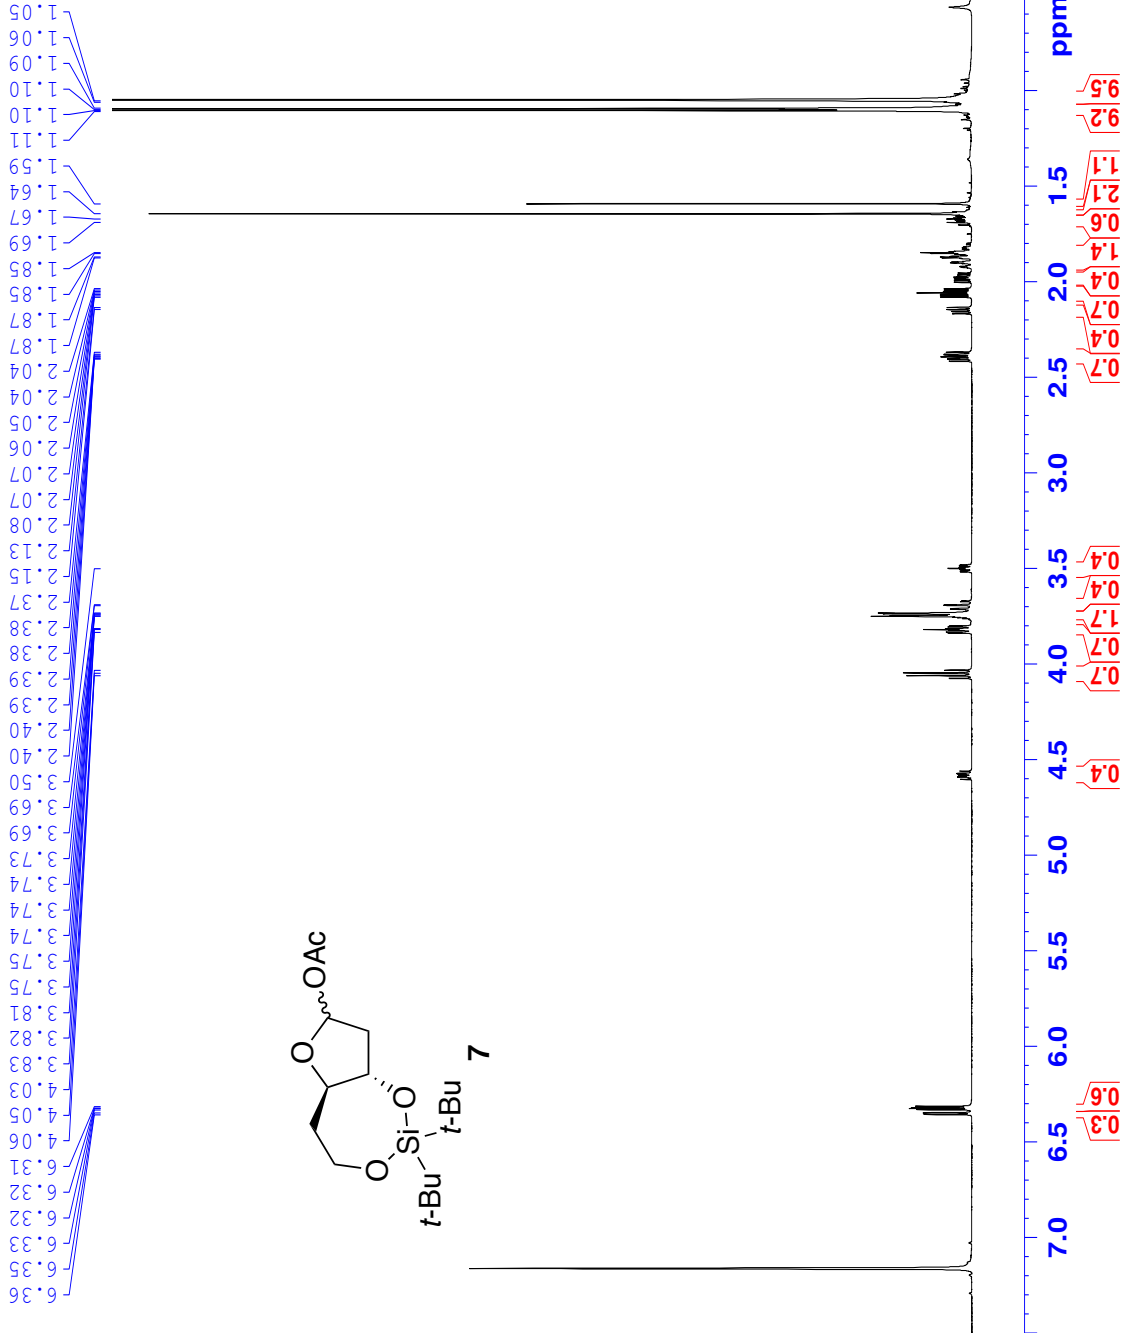

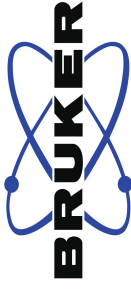

Current Data Parameters  
NAME VII-IV-16-A  
EXPNO 6  
PROCNO 1

F2 - Acquisition Parameters  
Date\_ 20120917  
Time 16.41  
INSTRUM spect  
PROBHD 5 mm PABBO BB/  
PULPROG zgpg30  
TD 65536  
SOLVENT C6D6  
DS 128  
NS 0  
SWH 36057.691 Hz  
FIDRES 0.550197 Hz  
AQ 0.9088159 sec  
RG 184.65  
DW 13.867 usec  
DE 6.50 usec  
TE 298.5 K  
D1 2.50000000 sec  
D11 0.03000000 sec  
TD0 1

==== CHANNEL f1 =====  
NUC1 13C  
PI 10.65 usec  
PLW1 104.0000000 W  
SFO1 150.9329866 MHz

==== CHANNEL f2 =====  
CPDPRG2 waltz16  
NUC2 1H  
PCPD2 70.00 usec  
PLW2 26.50000000 W  
PLW12 0.65438998 W  
PLW13 0.32065001 W  
SFO2 600.1924008 MHz

F2 - Processing parameters  
SI 32768  
SF 150.9178394 MHz  
WDW EM  
SSB 0  
LB 1.00 Hz  
GB 0  
PC 1.40

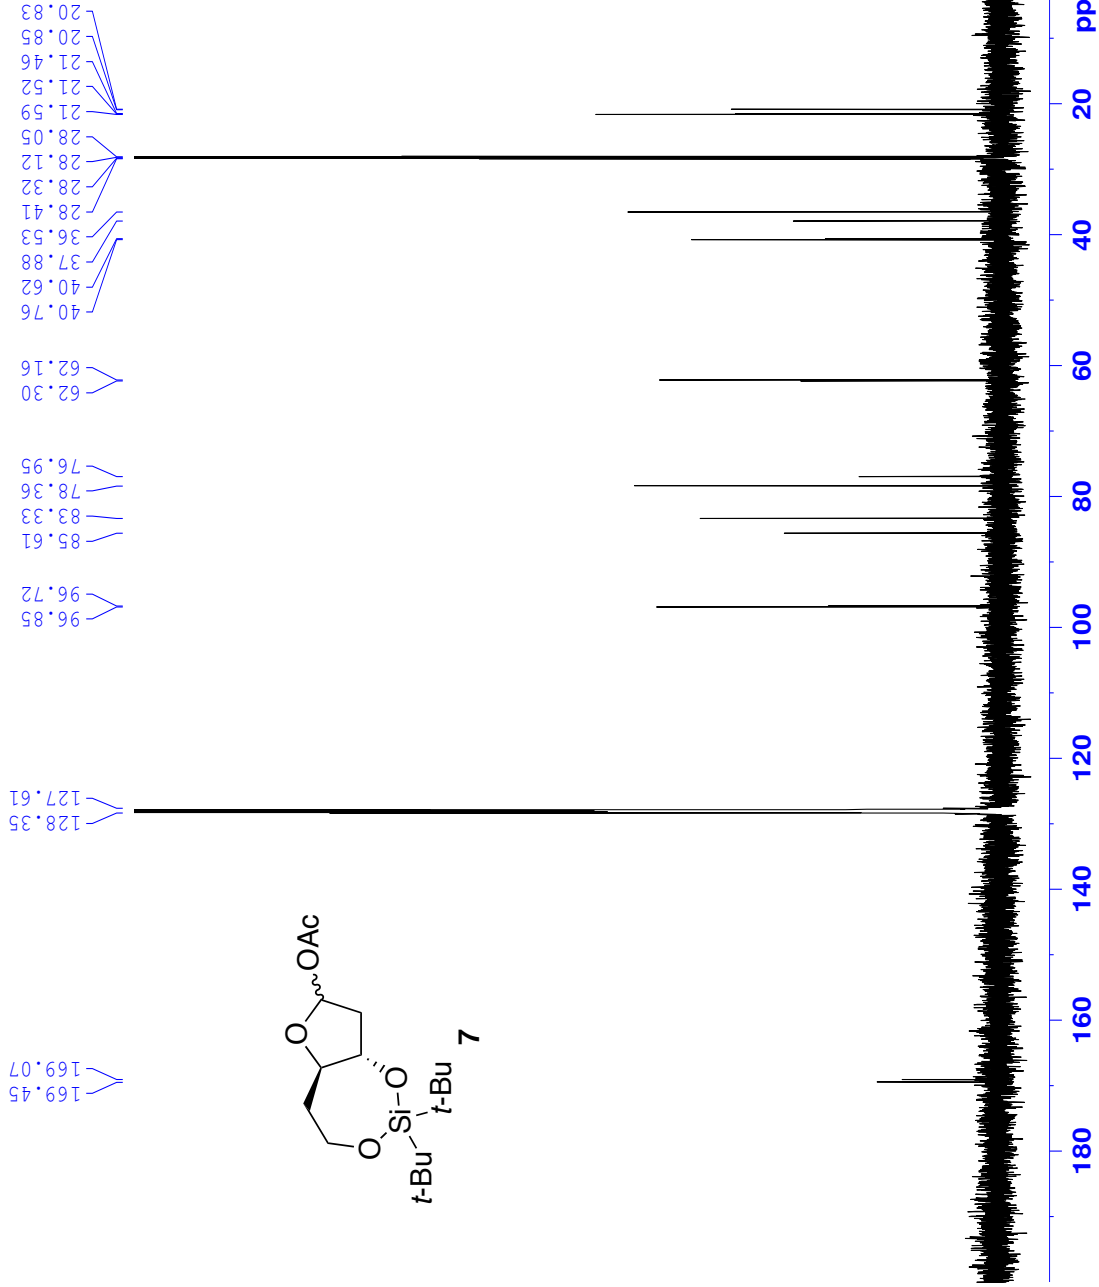

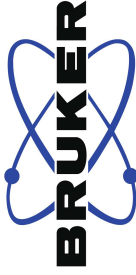

Current Data Parameters  
NAME VTT-IV-85-A  
EXPNO 1  
PROCNO 1

F2 - Acquisition Parameters  
Date\_ 20130307  
Time 18.42  
INSTRUM spect  
PROBHD 5 mm PAQXI 1H/  
PULPROG zg30  
TD 65536  
SOLVENT C6D6  
NS 8  
DS 0  
SWH 12335.526 Hz  
FIDRES 0.188225 Hz  
AQ 2.6564426 sec  
RG 33.59  
DW 40.533 usec  
DE 6.50 usec  
TE 298.2 K  
D1 2.00000000 sec  
TD0 1

==== CHANNEL f1 =====  
NUC1 1H  
P1 9.79 usec  
PLW1 9.30000019 W  
SFO1 600.1937064 MHz

F2 - Processing parameters  
SI 65536  
SF 600.1899947 MHz  
WDW EM  
SSB 0  
LB 0.30 Hz  
GB 0  
PC 1.00

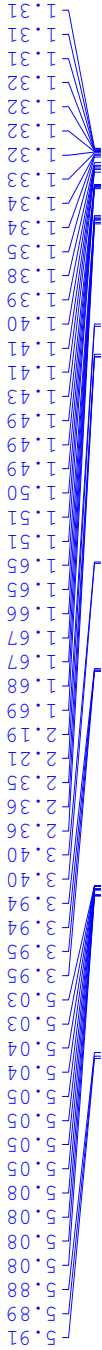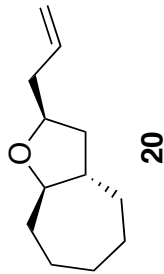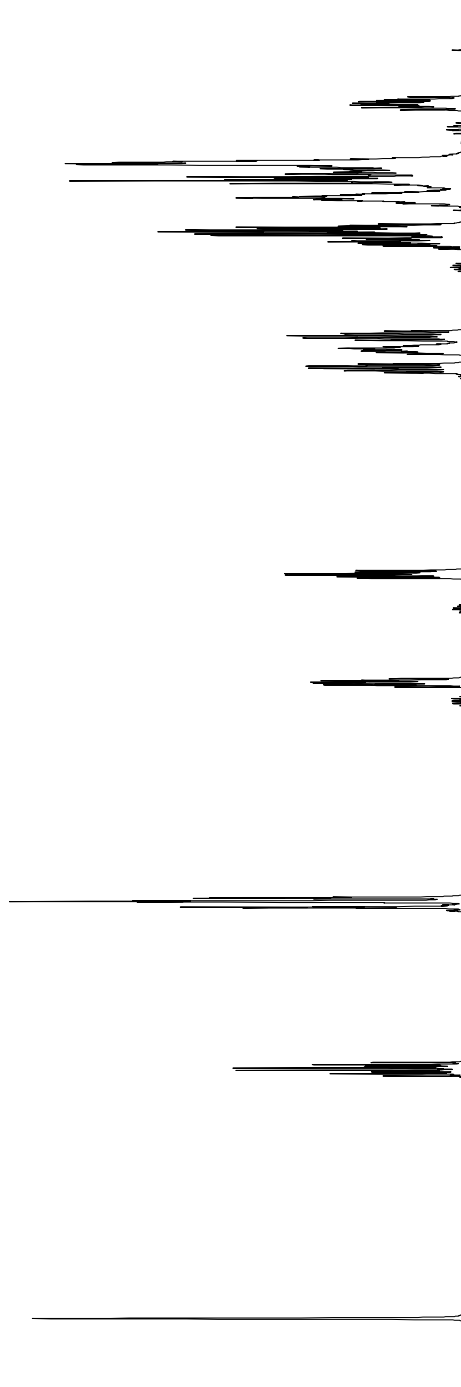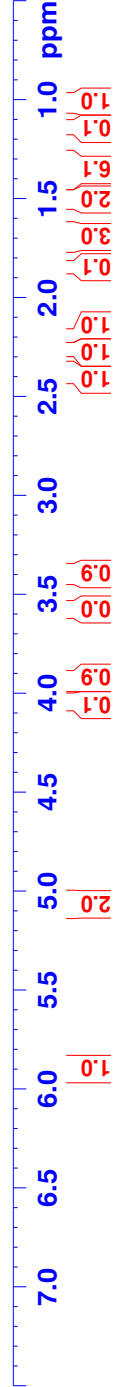



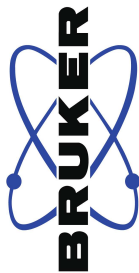

Current Data Parameters  
NAME VTT-IV-85-A  
EXPNO 2  
PROCNO 1

F2 - Acquisition Parameters  
Date\_ 20130307  
Time\_ 18.44  
INSTRUM spect  
PROBHD 5 mm PAQXI 1H/  
PULPROG zgpg30  
TD 65536  
SOLVENT C6D6  
NS 128  
DS 0  
SWH 36057.691 Hz  
FIDRES 0.550197 Hz  
AQ 0.9088159 sec  
RG 184.65  
DW 13.867 usec  
DE 6.50 usec  
TE 298.2 K  
D1 2.00000000 sec  
D11 0.03000000 sec  
TD0 1

==== CHANNEL f1 =====  
NUC1 13C  
P1 15.00 usec  
PLW1 106.0000000 W  
SFO1 150.9329866 MHz

==== CHANNEL f2 =====  
CPDPRG2 waltz16  
NUC2 1H  
PCPD2 70.00 usec  
PLW2 9.30000019 W  
PLWI2 0.18190999 W  
PLWI3 0.08913500 W  
SFO2 600.1924008 MHz

F2 - Processing parameters  
SI 32768  
SF 150.9178381 MHz  
WDW EM  
SSB 0  
LB 1.00 Hz  
GB 0  
PC 1.40

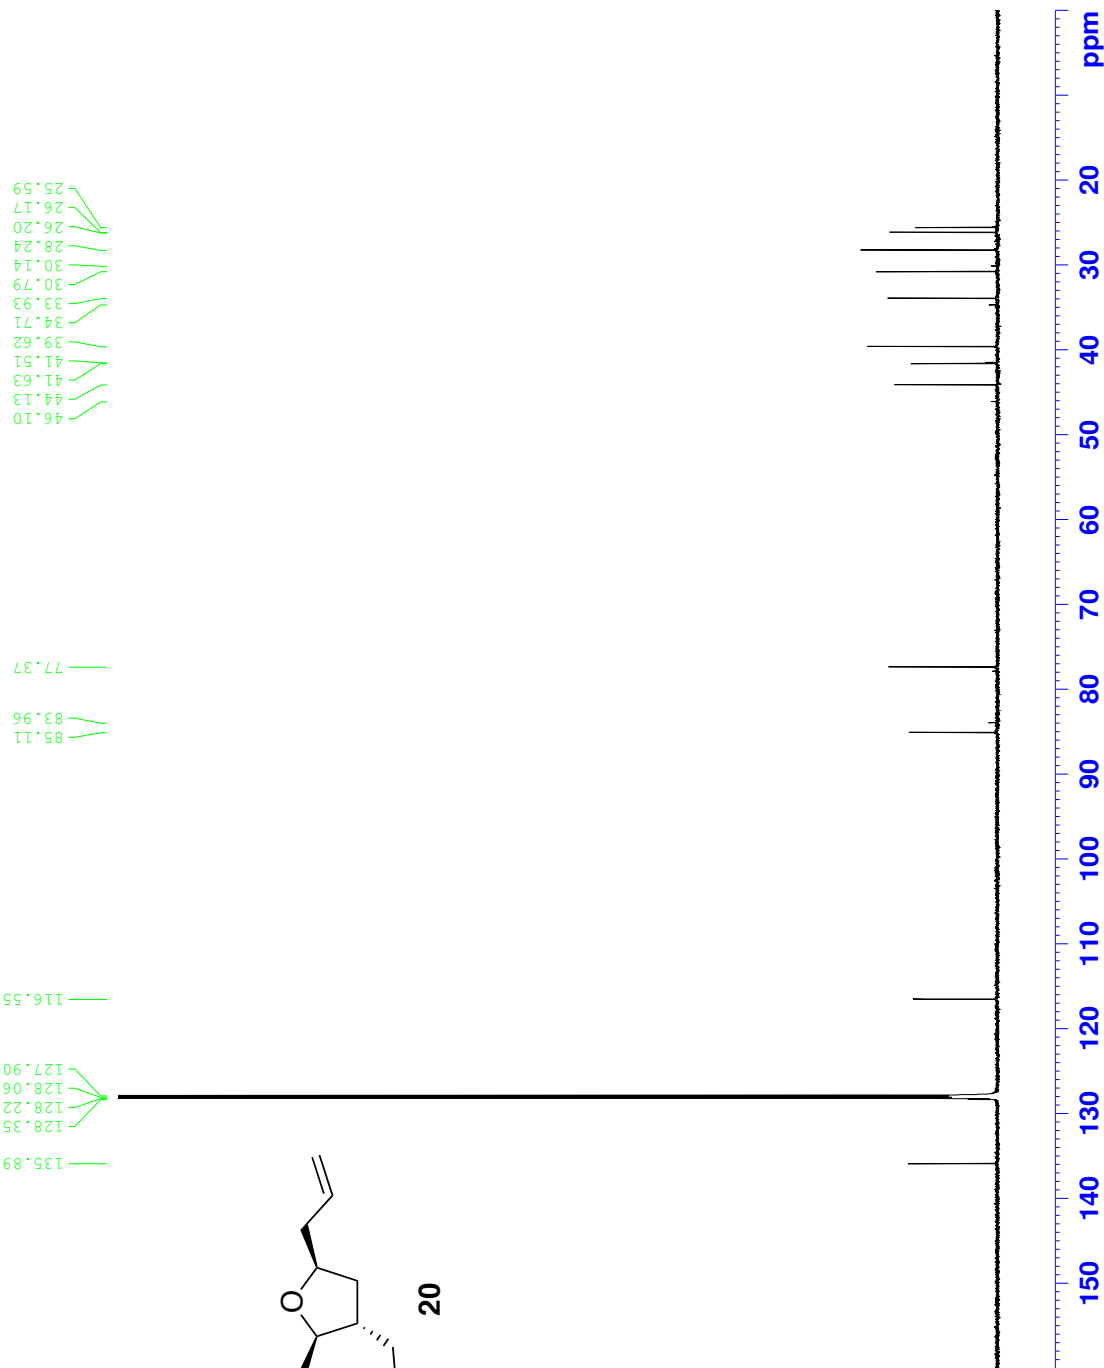

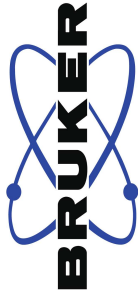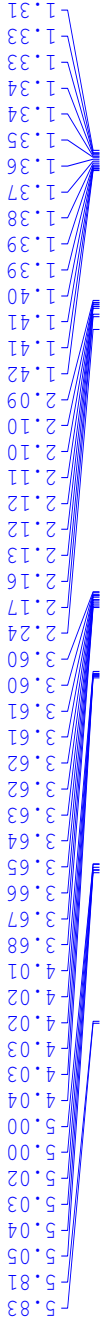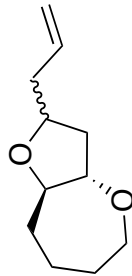

Current Data Parameters  
NAME VTT-III-200-A  
EXPNO 5  
PROCNO 1

F2 - Acquisition Parameters  
Date\_ 20120813  
Time 15.58  
INSTRUM spect  
PROBHD 5 mm FAPBO BB/  
PULPROG zg30  
TD 65536  
SOLVENT C6D6  
NS 8  
DS 0  
SWH 12335.526 Hz  
FIDRES 0.188225 Hz  
AQ 2.6564426 sec  
RG 76.07  
DW 40.533 usec  
DE 6.50 usec  
TE 298.1 K  
D1 2.0000000 sec  
TD0 1

==== CHANNEL f1 =====  
NUC1 1H  
P1 11.00 usec  
PLW1 26.5000000 W  
SFO1 600.1937064 MHz

F2 - Processing parameters  
SI 65536  
SF 600.1899954 MHz  
WDW EM  
SSE 0  
LB 0.30 Hz  
GB 0  
PC 1.00

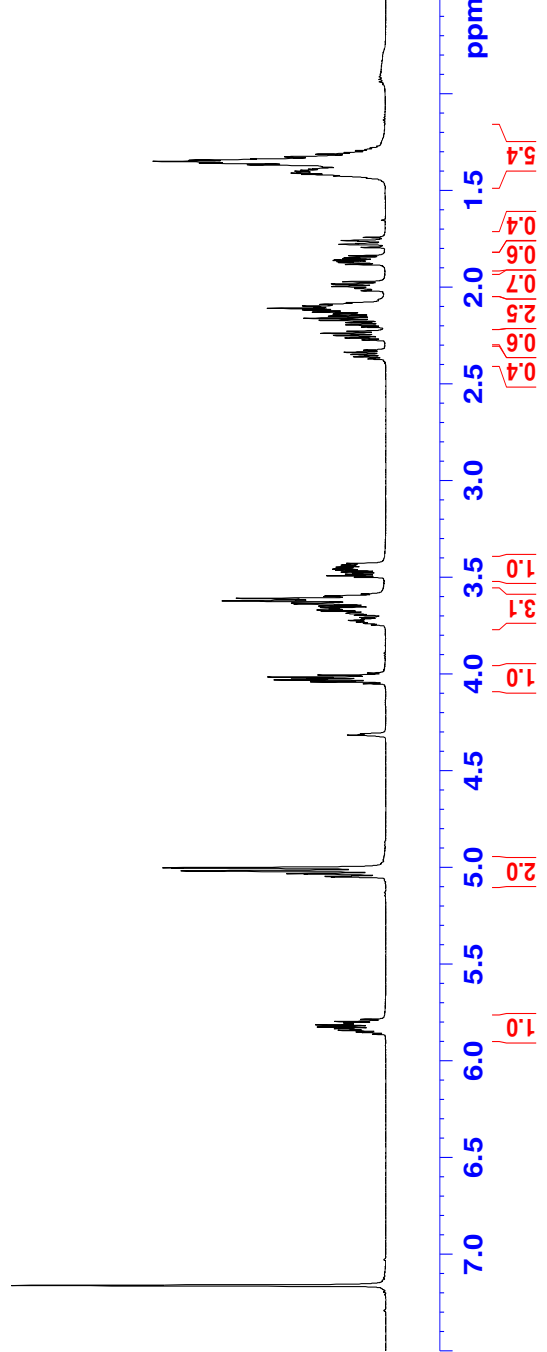

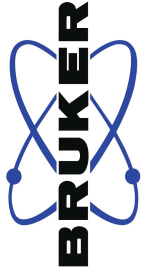

Current Data Parameters  
NAME VTI-III-200-A  
EXPNO 6  
PROCNO 1

F2 - Acquisition Parameters  
Date\_ 20120613  
Time 16.00  
INSTRUM spect  
PROBHD 5 mm PABBO/BB/  
PULPROG zgpg30  
TD 65336  
SOLVENT C6D6  
NS 128  
DS 0  
SWH 36057.691 Hz  
FIDRES 0.550197 Hz  
AQ 0.9088159 sec  
RG 184.65  
DW 13.867 usec  
DE 6.50 usec  
TE 298.2 K  
D1 2.00000000 sec  
D11 0.03000000 sec  
TD0 1

==== CHANNEL f1 =====  
NUC1 13C  
P1 10.65 usec  
PLW1 104.0000000 W  
SFO1 150.9329866 MHz

==== CHANNEL f2 =====  
CPDPRG2 waltz16  
NUC2 1H  
PCPD2 70.00 usec  
PLW2 26.5000000 W  
PLM2 0.5900000 W  
PLM3 0.5900000 W  
SFO2 600.1924008 MHz

F2 - Processing Parameters  
SI 32768  
SF 150.9178960 MHz  
WDW EM  
SSB 0  
LB 1.00 Hz  
GB 0  
PC 1.40

41.21  
40.74  
38.43  
37.53  
31.91  
30.75  
28.87  
28.80  
22.88  
22.49

83.75  
81.73  
81.10  
80.60  
76.62  
76.10  
70.22  
69.98

134.86  
134.75  
127.97  
127.84  
127.68  
127.52  
116.62  
116.58

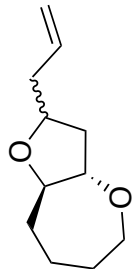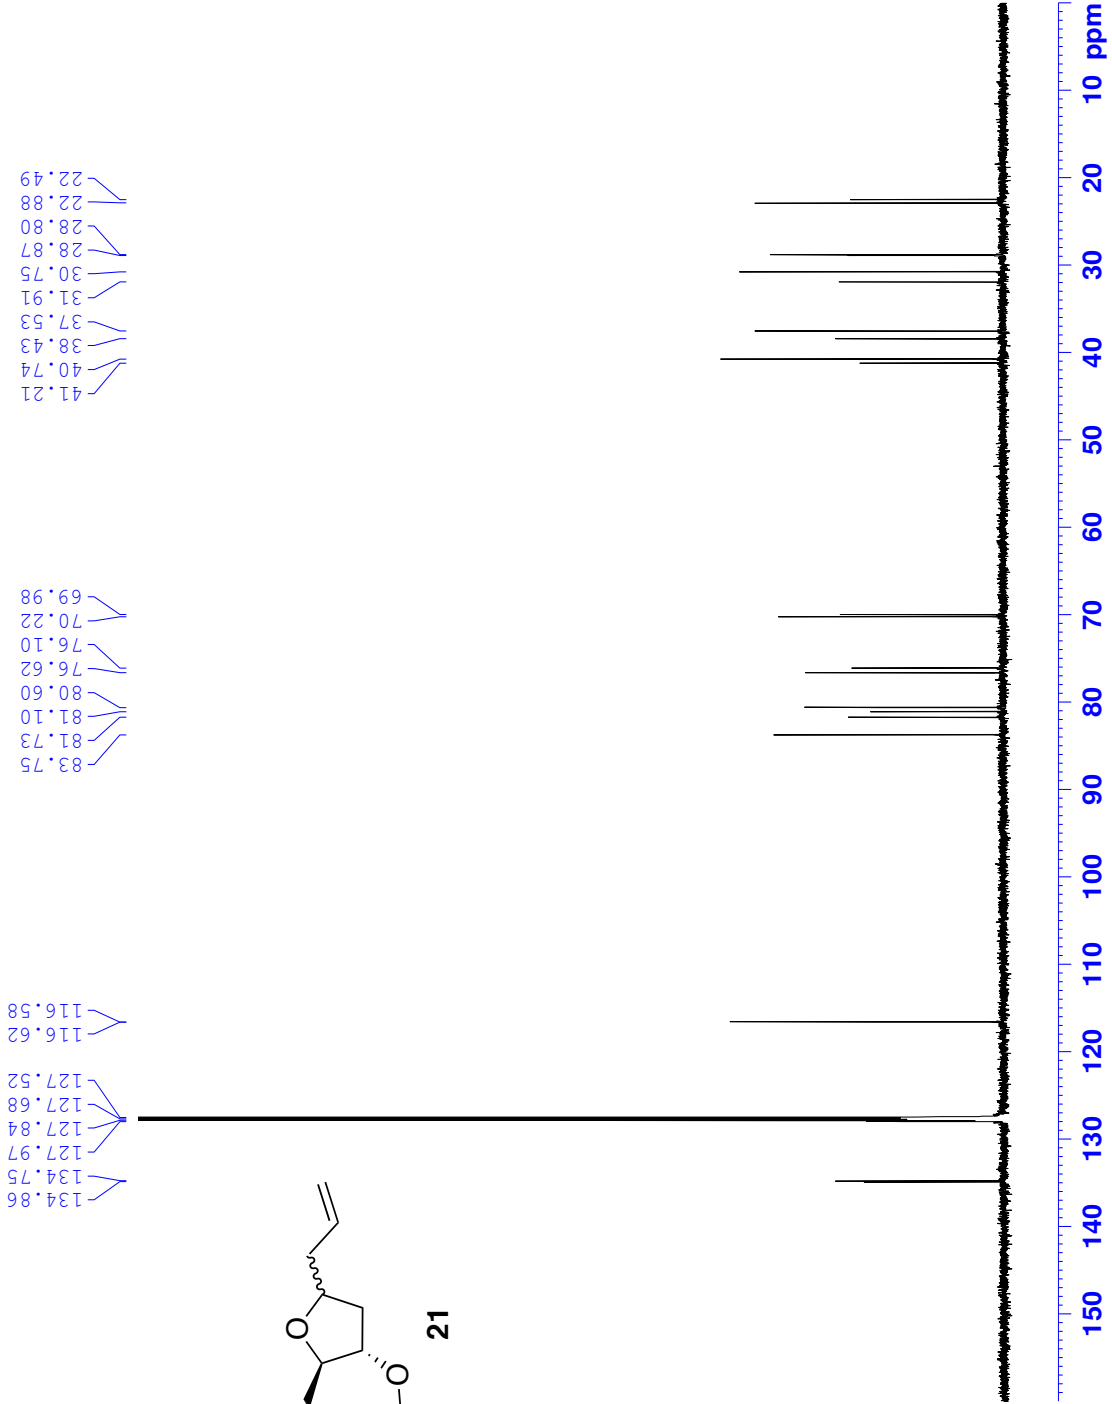

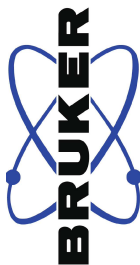

Current Data Parameters  
 NAME VIT-II-153-A2  
 EXPNO 2  
 PROCNO 1

F2 - Acquisition Parameters  
 Date\_ 20110921  
 Time 15.43  
 INSTRUM spect  
 PROBHD 5 mm BBO BB-1H  
 PULPROG zgpg30  
 ID 65536  
 SOLVENT CDC13  
 NS 35  
 DS 4  
 SWH 30030.029 Hz  
 FIDRES 0.458222 Hz  
 AQ 1.0912244 sec  
 RG 32768  
 DW 16.650 usec  
 DE 6.50 usec  
 TE 298.5 K  
 D1 2.0000000 sec  
 D11 0.0300000 sec  
 TD0 1

==== CHANNEL f1 =====  
 NUC1 13C  
 P1 10.25 usec  
 PL1 2.00 dB  
 PL1W 49.29017639 W  
 SF01 125.787161 MHz

==== CHANNEL f2 =====  
 CPDPRG2 waltz16  
 NUC2 1H  
 P2 70.00 usec  
 PL2 -3.00 dB  
 PL12 14.63 dB  
 PL13 14.91 dB  
 PL2W 37.58904266 W  
 PL12W 0.64872593 W  
 PL13W 0.60822082 W  
 SF02 500.2010008 MHz

F2 - Processing parameters  
 SI 32768  
 SF 125.7751222 MHz  
 EM  
 WDW 0  
 SSB 0  
 LB 1.00 Hz  
 GB 0  
 PC 1.40

85.64  
 84.51  
 78.67  
 77.82  
 77.41  
 77.16  
 76.91  
 68.17  
 67.97  
 66.30  
 51.02  
 49.19  
 40.97  
 40.68  
 35.13  
 33.13  
 27.94  
 27.87  
 21.83  
 21.73

134.50  
 134.46  
 117.42

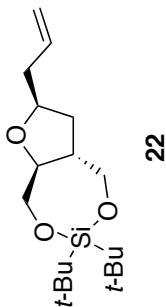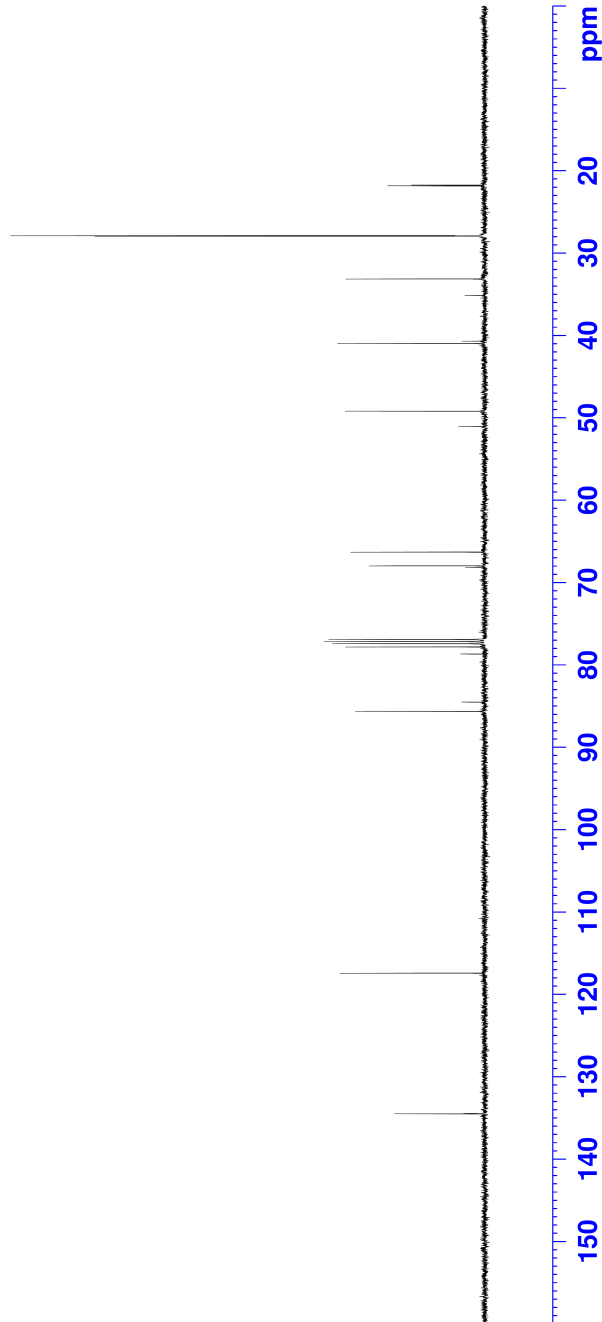

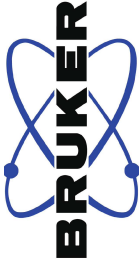

Current Data Parameters  
 NAME VTT-II-186-A  
 EXPNO 1  
 PROCNO 1

F2 - Acquisition Parameter  
 Date\_ 20111103  
 Time 18.21  
 INSTRUM spect  
 PROBHD 5 mm BBO BB-1H  
 PULPROG zg30  
 TD 65336  
 SOLVENT CDCl3  
 NS 16  
 DS 2  
 SWH 8278.146 Hz  
 FIDRES 0.126314 Hz  
 AQ 3.9584243 se  
 RG 256  
 DW 60.400 us  
 DE 6.50 us  
 TE 298.2 K  
 D1 2.00000000 se  
 TD0 1

==== CHANNEL f1 =====  
 NUC1 1H  
 P1 8.10 us  
 PL1 -5.00 dB  
 PL1W 31.77312851 W  
 SF01 400.1324710 MHz

F2 - Processing parameters  
 SI 32768  
 SF 400.1300091 MHz  
 WDW EM  
 SSB 0  
 LB 0.30 Hz  
 GB 0  
 PC 1.00

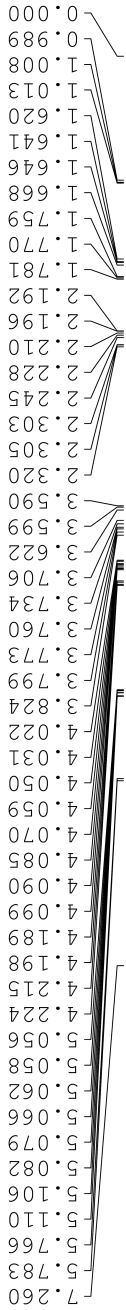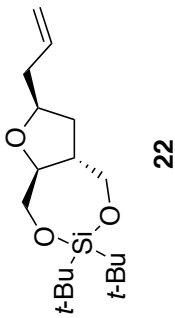

22

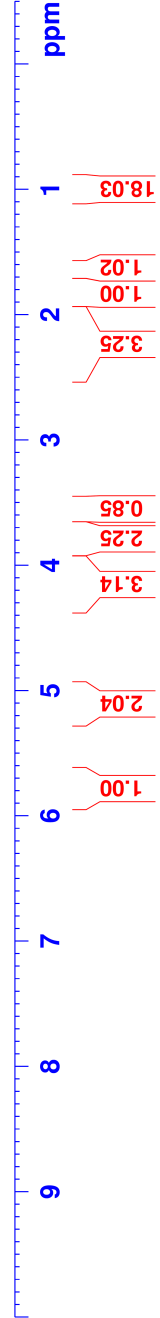

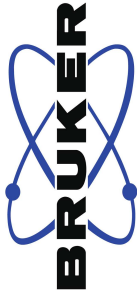

Current Data Parameters  
NAME VII-IV-95-A  
EXPNO 1  
PROCNO 1

F2 - Acquisition Parameters  
Date\_ 20130321  
Time 19.50  
INSTRUM spect  
PROBHD 5 mm PABBO BB/  
PULPROG zg30  
ID 65536  
SOLVENT C6D6  
NS 8  
DS 0  
SWH 12335.526 Hz  
FIDRES 0.188225 Hz  
AQ 2.6564426 sec  
RG 33.59  
DW 40.533 usec  
DE 6.50 usec  
TE 298.1 K  
D1 1.00000000 sec  
TDO 1

==== CHANNEL f1 =====  
NUC1 1H  
P1 11.00 usec  
PLW1 26.5000000 W  
SFO1 600.1937064 MHz

F2 - Processing parameters  
SI 65536  
SF 600.1899953 MHz  
WDW EM  
SSB 0  
LB 0.30 Hz  
GB 0  
PC 1.00

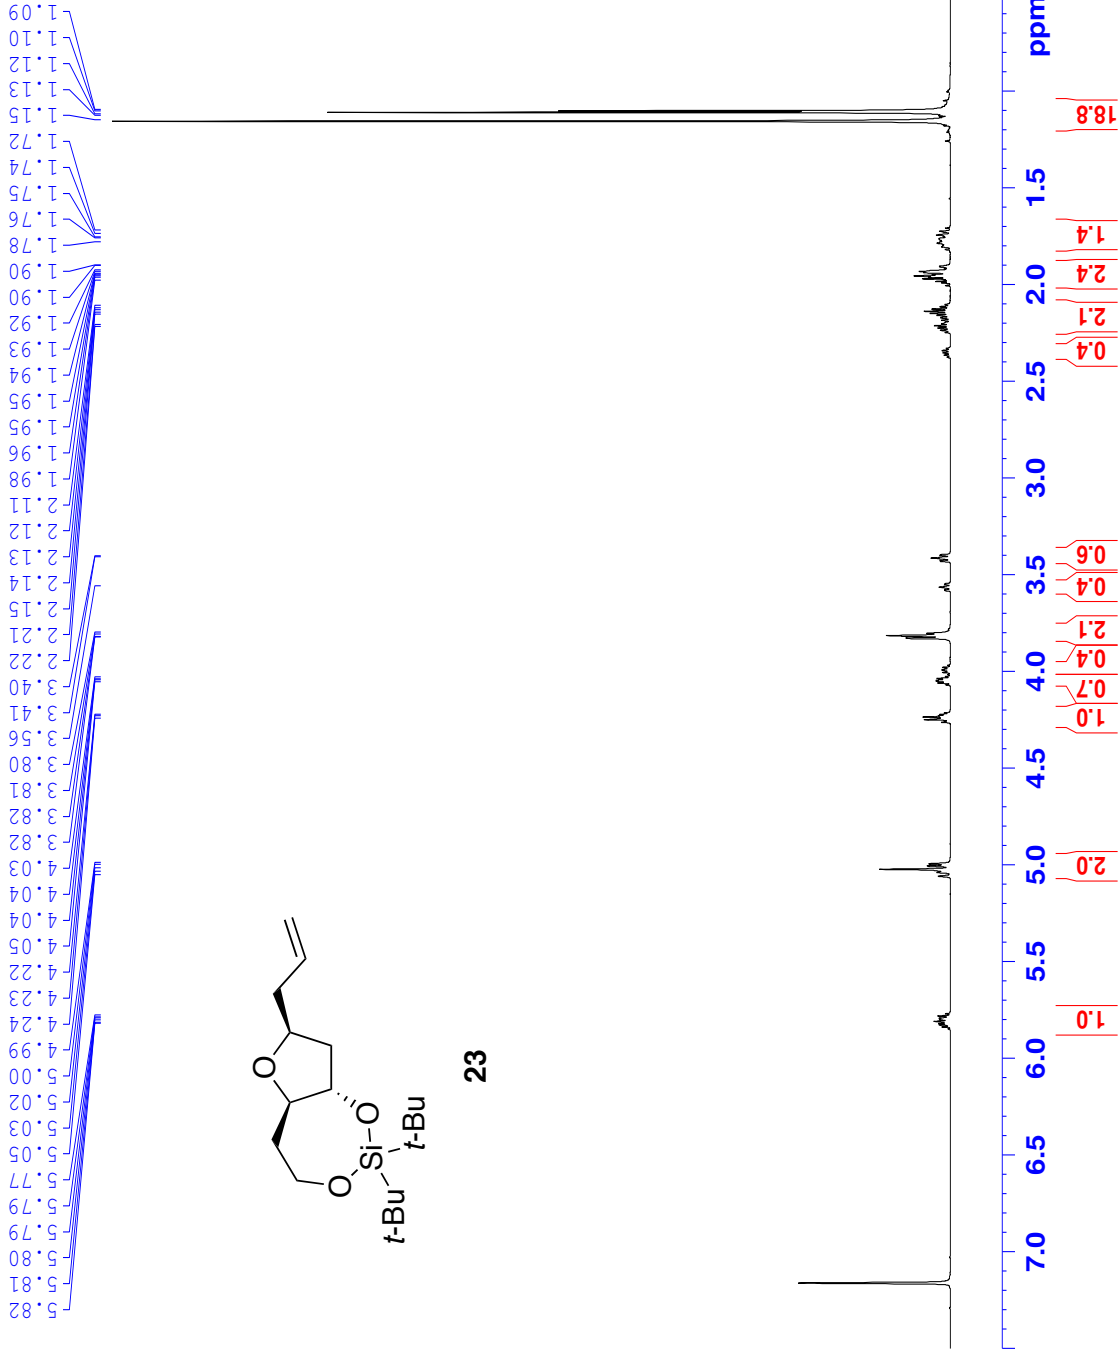

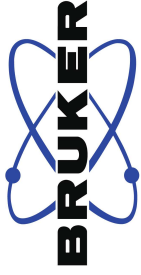

Current Data Parameters  
NAME VTT-IV-95-A  
EXPNO 6  
PROCNO 1

F2 - Acquisition Parameters  
Date\_ 20130321  
Time 21.39  
INSTRUM spect  
PROBHD 5 mm PABBO BB/  
PULPROG zgpg30  
TD 65536  
SOLVENT C6D6  
NS 128  
DS 0  
SWH 36057.691 Hz  
FIDRES 0.550197 Hz  
AQ 0.9088159 sec  
RG 184.65  
DM 13.867 usec  
DE 6.50 usec  
TE 298.1 K  
D1 2.50000000 sec  
D11 0.03000000 sec  
TDO 1

==== CHANNEL f1 =====  
NUC1 13C  
P1 10.65 usec  
PLW1 104.0000000 W  
SFO1 150.9329866 MHz

==== CHANNEL f2 =====  
CPDPRG2 waltz16  
NUC2 1H  
PCPD2 70.00 usec  
PLW2 26.50000000 W  
PLW12 0.65438998 W  
PLW13 0.32065001 W  
SFO2 600.1924008 MHz

F2 - Processing parameters  
SI 32768  
SF 150.9178388 MHz  
WDW EM  
SSB 0  
LB 1.00 Hz  
GB 0  
PC 1.40

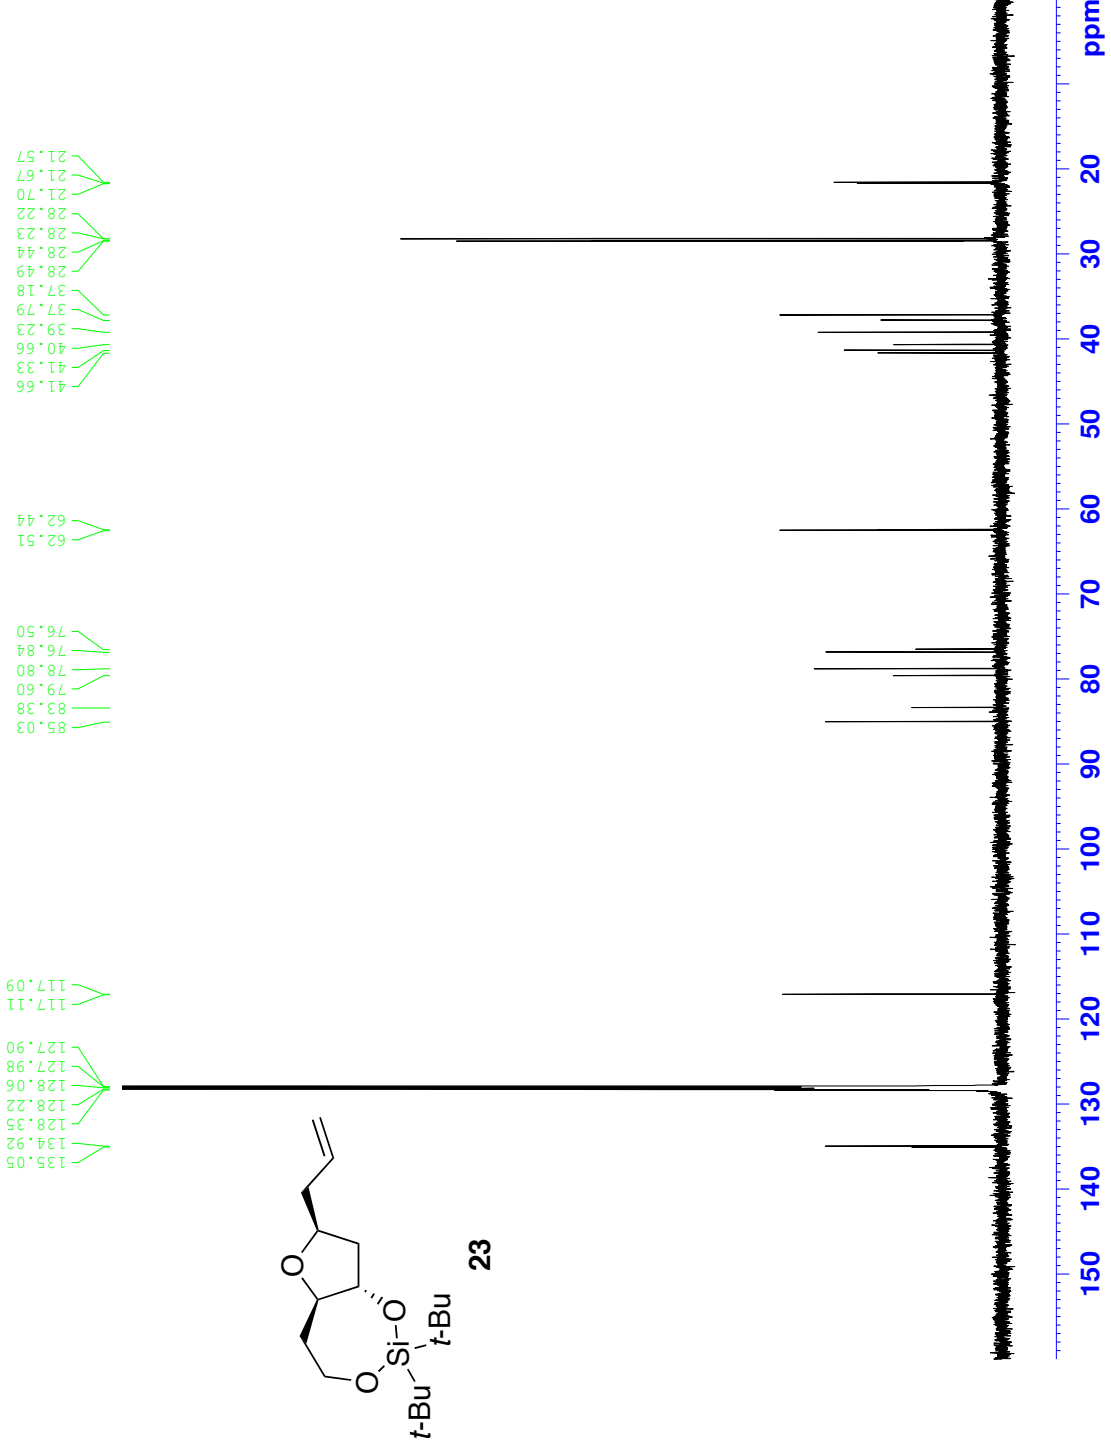

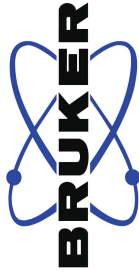

Current Data Parameters  
NAME VII-IV-97-A  
EXPNO 1  
PROCNO 1

F2 - Acquisition Parameters  
Date\_ 20130328  
Time 21.04  
INSTRUM spect  
PROBHD 5 mm PABBO BB/  
PULPROG zg30  
TD 65536  
SOLVENT MeOD  
NS 16  
DS 0  
SWH 12335.526 Hz  
FIDRES 0.188225 Hz  
AQ 2.6564426 sec  
RG 33.59  
DW 40.533 usec  
DE 6.50 usec  
TE 298.1 K  
D1 2.00000000 sec  
TD0 1

==== CHANNEL f1 =====  
NUC1 1H  
P1 11.00 usec  
PLW1 26.50000000 W  
SFO1 600.1937064 MHz

F2 - Processing parameters  
SI 65536  
SF 600.1900117 MHz  
WDW EM  
SSB 0  
LB 0.30 Hz  
GB 0  
PC 1.00

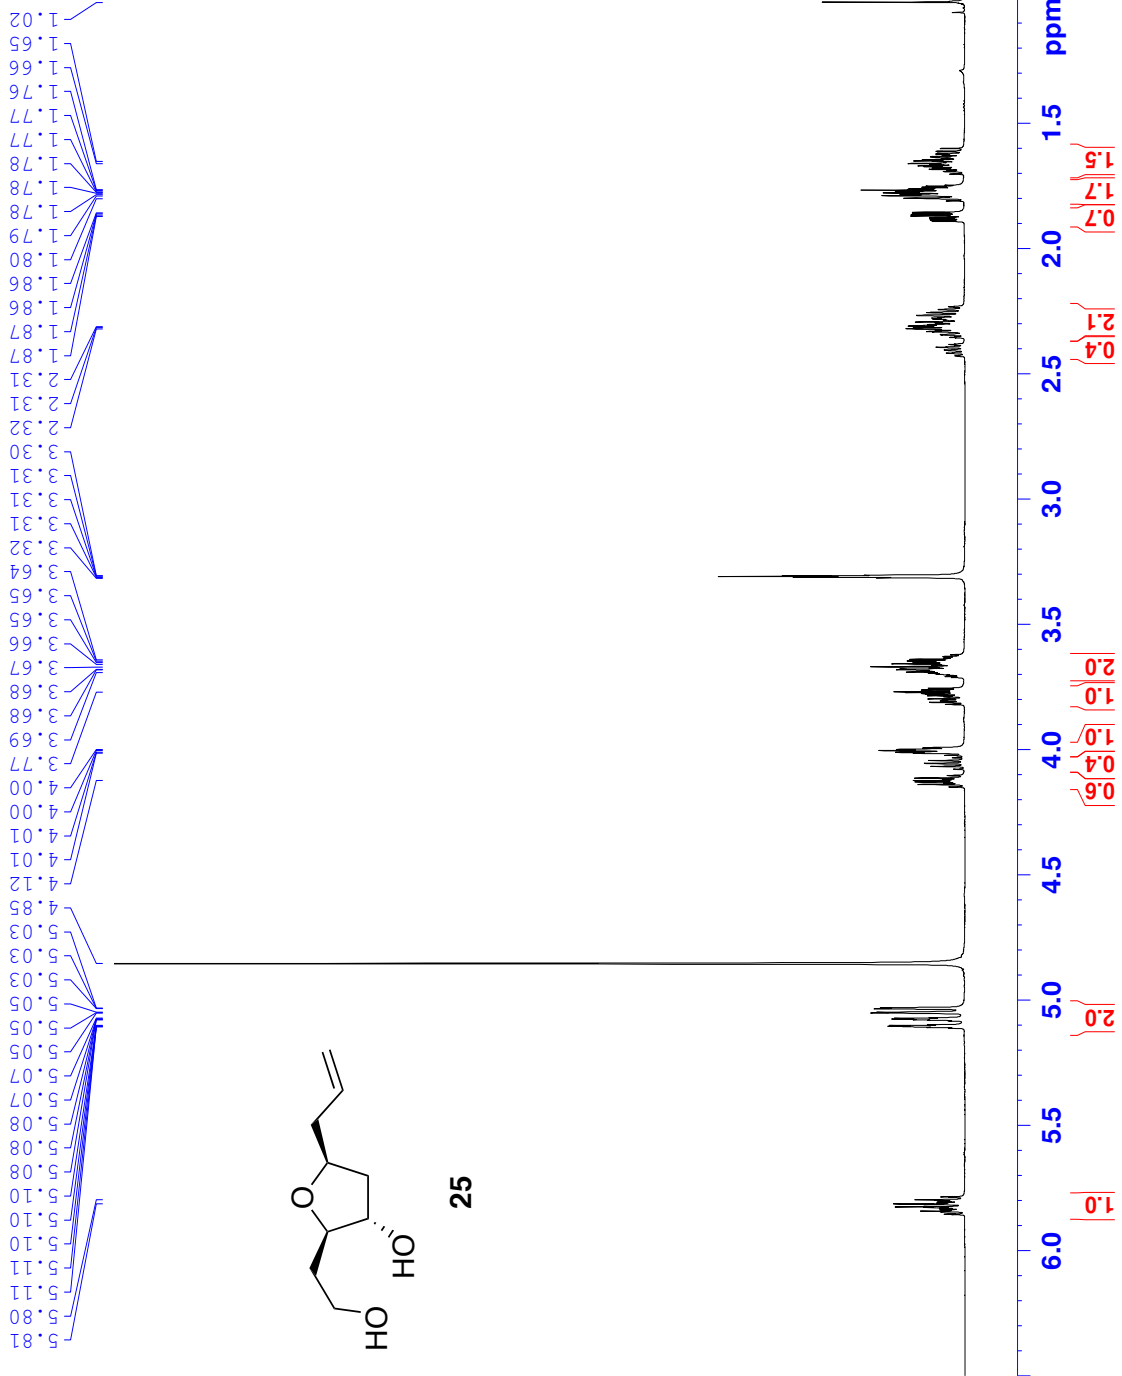



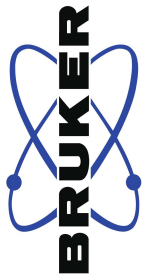

Current Data Parameters  
NAME VIT-IV-97-A  
EXPNO 2  
PROCNO 1

F2 - Acquisition Parameters  
Date\_ 20130328  
Time 21.07  
INSTRUM spect  
PROBHD 5 mm PABBO BB/  
PULPROG zgpg30  
TD 65536  
SOLVENT MeOD  
NS 955  
DS 0  
SWH 36057.691 Hz  
FIDRES 0.550197 Hz  
AQ 0.9088159 sec  
RG 184.65  
DW 13.867 usec  
DE 6.50 usec  
TE 298.1 K  
D1 2.50000000 sec  
D11 0.05000000 sec  
TD0 1

==== CHANNEL f1 =====  
NUC1 13C  
P1 10.25 usec  
PLW1 104.00000000 W  
SF01 150.9329866 MHz

==== CHANNEL f2 =====  
CPDPRG2 waltz16  
NUC2 13C  
PCPD2 70.00 usec  
PLW2 26.50000000 W  
PLWI2 0.65438998 W  
PLWI3 0.32065001 W  
SF02 600.1924008 MHz

F2 - Processing parameters  
SI 32768  
SF 150.9176618 MHz  
WDW EM  
SSB 0  
LB 1.00 Hz  
GB 0  
PC 1.40

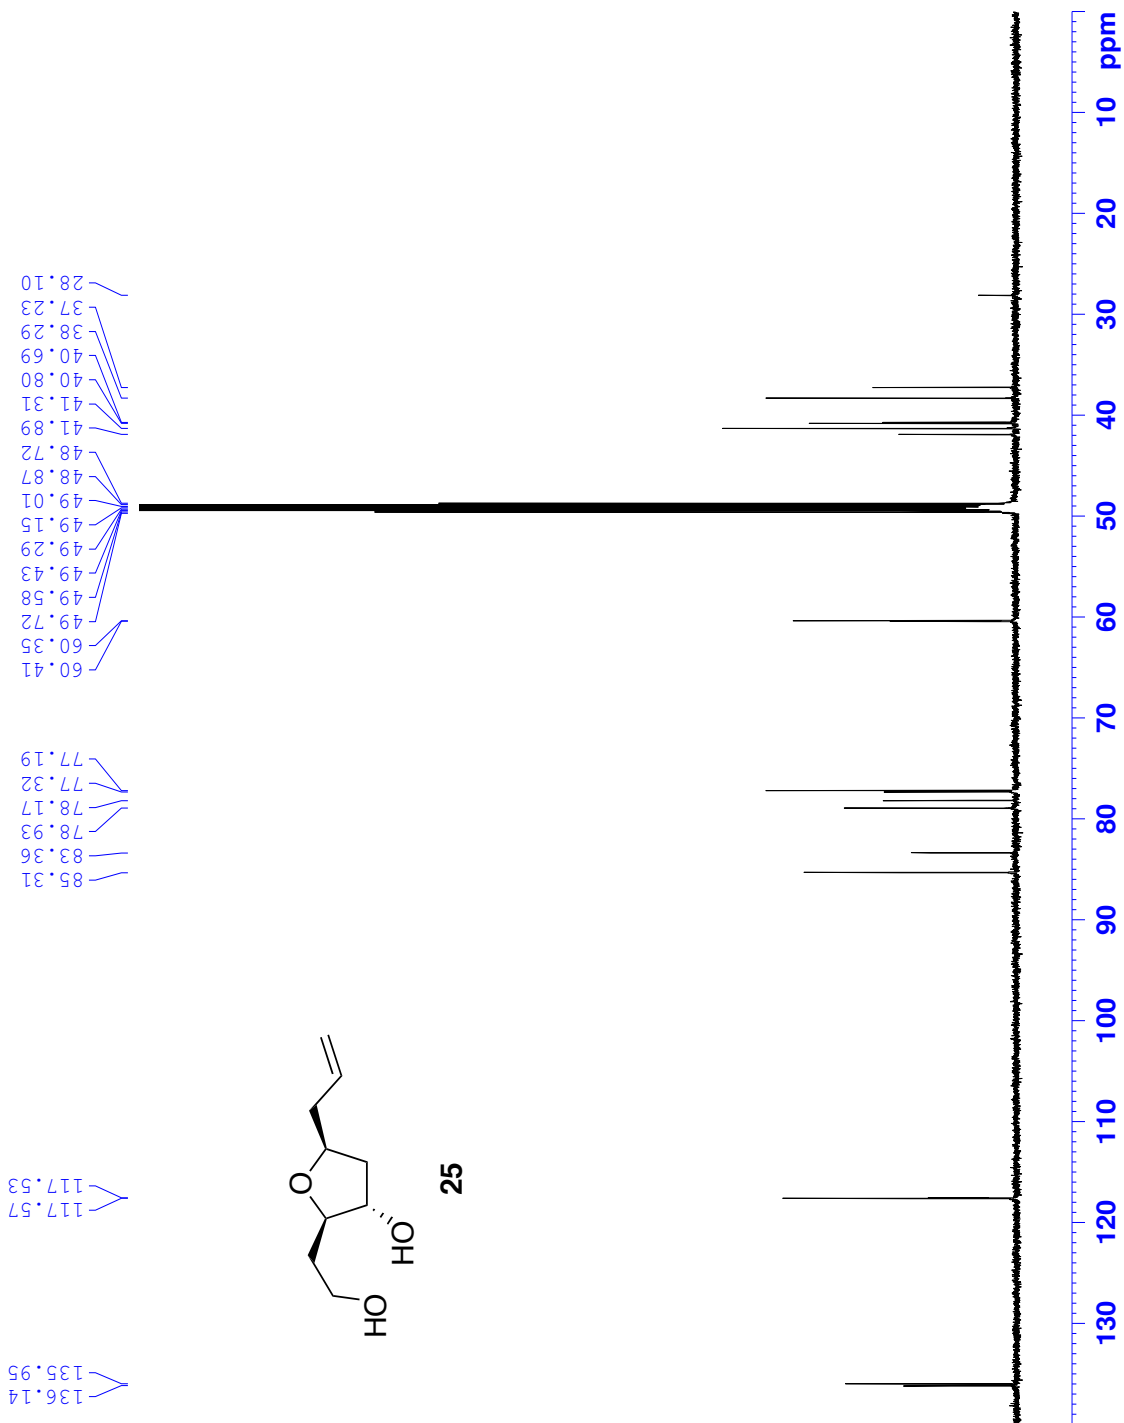

VTT-II-156-B 1 1 "D:\NMR data\data\oal209\nmr"

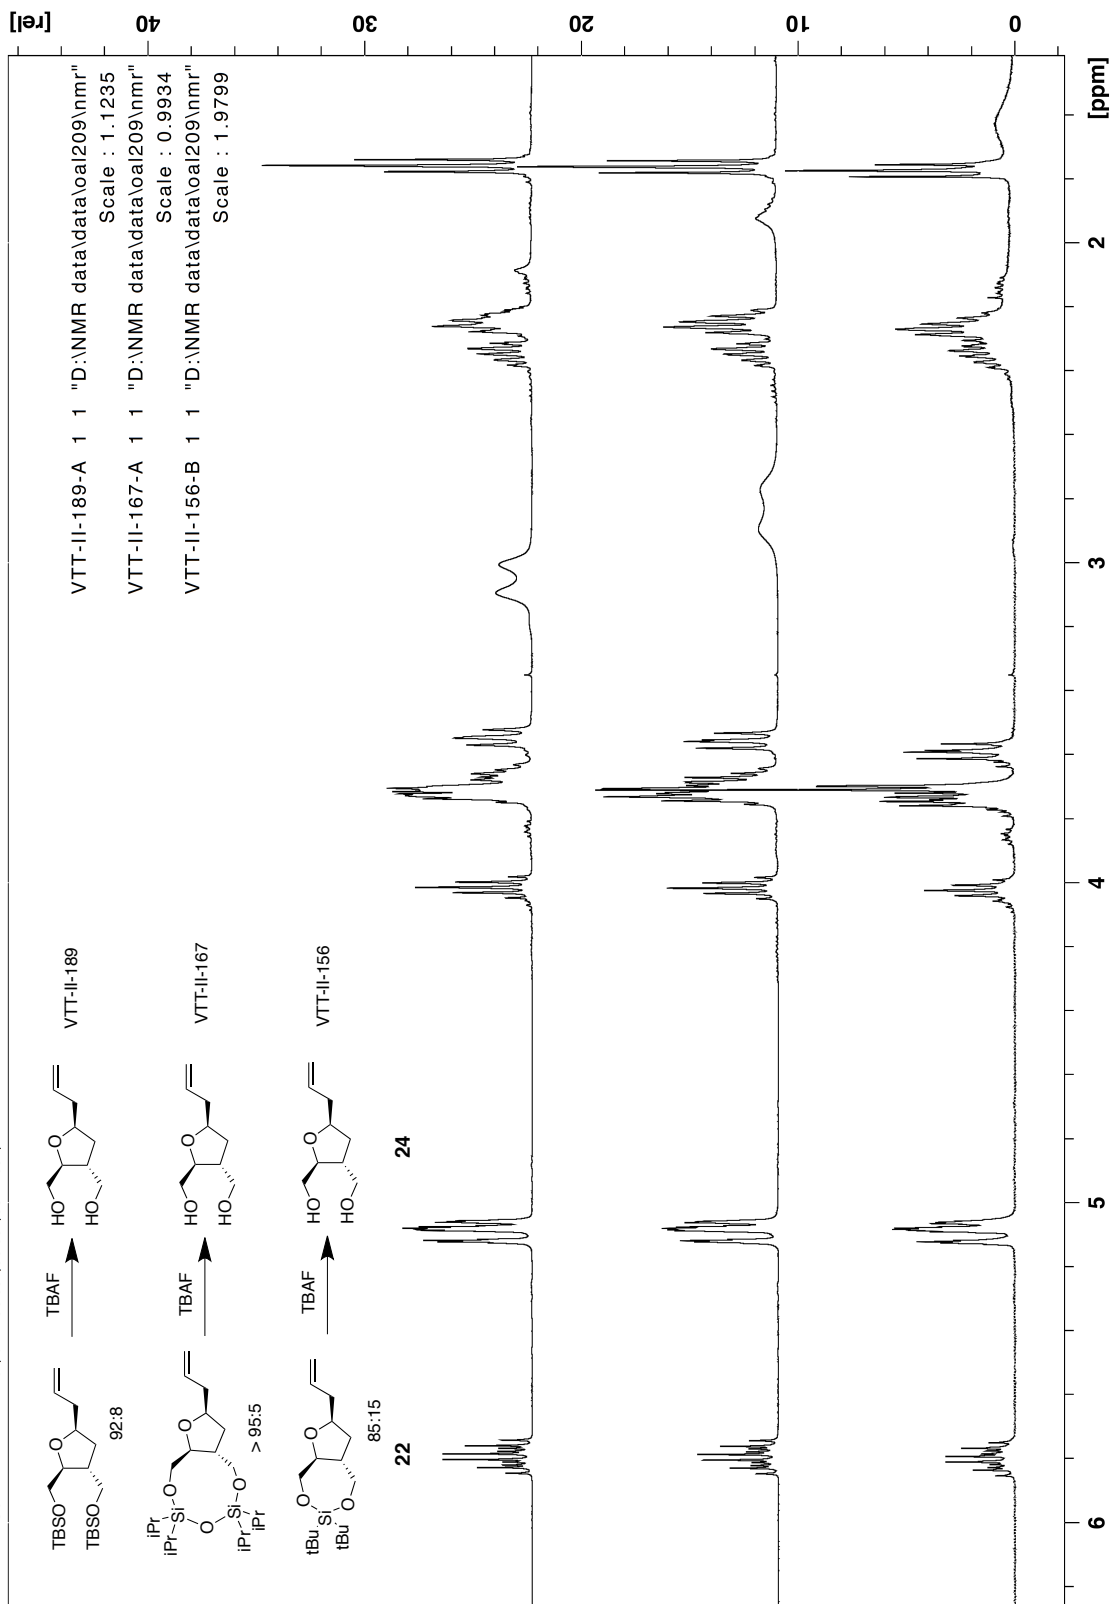

Supplement: c4ob01251h1.pdf [file c4ob01251h1.pdf]
